# Supplementary material for: Iminyl-radicals by electrochemical decarboxylation of α-imino-oxy acids: construction of indole-fused polycyclics
Source: Royal Society of Chemistry journal article supplement (doi:10.1039/d1cc03891e), 2021-01-01

## Supporting Information

### **Iminyl-Radicals by Electrochemical Decarboxylation of $\alpha$ -Imino-oxy Acids: Construction of Indole-fused Polycyclics**

Jin-Lin Wan, Jian-Feng Cui, Wei-Qiang Zhong and Jing-Mei Huang\*

Key Laboratory of Functional Molecular Engineering of Guangdong Province, School of Chemistry and Chemical Engineering, South China University of Technology, Guangzhou, Guangdong 510640, China

\*E-mail: chehjm@scut.edu.cn

## Table of Contents

|                                                                             |     |
|-----------------------------------------------------------------------------|-----|
| 1. General Information.....                                                 | S2  |
| 2. Optimization of Reaction Conditions.....                                 | S3  |
| 3. Synthesis and Characterization of Starting Substrates.....               | S4  |
| 4. General Procedure and Characterization of the Electrolysis Products..... | S21 |
| 5. Cyclic Voltammetry Studies.....                                          | S33 |
| 6. Single Crystal Structure and Data of Compound <b>2a</b> .....            | S33 |
| 7. References.....                                                          | S35 |
| 8. NMR Spectra for Products.....                                            | S37 |

## 1. General Information

Commercial solvents and reagents were used without further purification unless otherwise noted.

Electrolysis reactions were conducted using a Model QJ3005T (32V) DC power supply purchased from Ningbo Jiuyuan Electronic Co., Ltd., China.

Analytical thin layer chromatography (TLC) plates and the silica gel (200 – 300 mesh) for column chromatography were phased from Qingdao Haiyang Chemical and Special Silica Gel Co, Ltd.

Proton nuclear magnetic resonance ( $^1\text{H}$  NMR), carbon nuclear magnetic resonance ( $^{13}\text{C}$  NMR) and fluorine nuclear magnetic resonance ( $^{19}\text{F}$  NMR) spectroscopy were performed on Bruker Advance III-400 spectrometers (400 MHz for  $^1\text{H}$  NMR, 101 MHz for  $^{13}\text{C}$  NMR, 377 MHz for  $^{19}\text{F}$  NMR) and Bruker AscendTM 500 spectrometers (500 MHz for  $^1\text{H}$  NMR, 126 MHz for  $^{13}\text{C}$  NMR, 471 MHz for  $^{19}\text{F}$  NMR). Chemical shifts of  $^1\text{H}$  NMR,  $^{13}\text{C}$  NMR and  $^{19}\text{F}$  NMR spectra were reported as in units of parts per million (ppm) downfield from TMS ( $\delta$  0.0 ppm) and relative to the signal of  $\text{CDCl}_3$  ( $\delta$  7.26 ppm for  $^1\text{H}$  NMR and  $\delta$  77.2 ppm for  $^{13}\text{C}$  NMR) and  $\text{DMSO}-d_6$  ( $\delta$  2.50 ppm for  $^1\text{H}$  NMR and  $\delta$  39.5 ppm for  $^{13}\text{C}$  NMR). Multiplicities were given as: s (singlet); br s (broad singlet); d (doublet); t (triplet); q (quartet); m (multiplets), etc. The number of protons (n) for a given resonance was indicated by nH.

Infrared spectra (IR) were recorded on a Bruker TENSOR 27 FTIR spectrophotometer and are reported as wavelength numbers ( $\text{cm}^{-1}$ ). Infrared spectra were recorded by preparing a KBr pellet containing the title compounds.

HR-MS was carried out on a high-resolution mass spectrometer (LCMS-IT-TOF and LCMS-Q Exactive).

Cyclic voltammetry (CV) analysis was performed on Ingsens IGS-1030 electrochemical workstation (Ingsens Instruments (Guangzhou) Co., Ltd., China) with a conventional three electrode cell, using a glassy carbon electrode (GCE) ( $d = 3\text{ mm}$ ) as working electrode, a Pt wire as counter electrode and saturated calomel electrode (SCE) as a reference electrode. Cyclic voltammograms were recorded at 100 mV/s scan rate.

## 2. Optimization of Reaction Conditions.

Table 1. Optimization of reaction conditions<sup>a</sup>

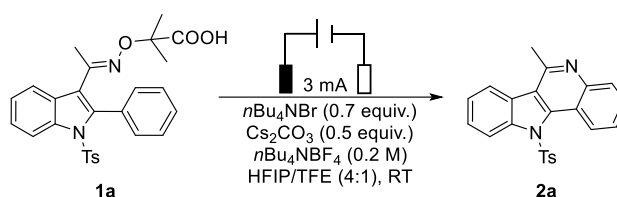

| entry | Deviation from standard conditions                                | Yield (%) <sup>b</sup> |
|-------|-------------------------------------------------------------------|------------------------|
| 1     | None                                                              | 82                     |
| 2     | HFIP as solvent                                                   | 58                     |
| 3     | TFE as solvent                                                    | 36                     |
| 4     | HFIP/TFE (1:1) as solvent                                         | 59                     |
| 5     | HFIP/TFE (2:3) as solvent                                         | 47                     |
| 6     | HFIP/MeOH (4:1) as solvent                                        | 64                     |
| 7     | HFIP/MeCN (4:1) as solvent                                        | 39                     |
| 8     | No $n\text{Bu}_4\text{NBr}$                                       | 41                     |
| 9     | $n\text{Bu}_4\text{NBr}$ (0.5 equiv.)                             | 58                     |
| 10    | $n\text{Bu}_4\text{NBr}$ (1.0 equiv.)                             | 71                     |
| 11    | 0.2M $n\text{Bu}_4\text{NBr}$ without $n\text{-Bu}_4\text{NBF}_4$ | 63                     |
| 12    | $\text{K}_2\text{CO}_3$ instead of $\text{Cs}_2\text{CO}_3$       | 64                     |
| 13    | $\text{Na}_2\text{CO}_3$ instead of $\text{Cs}_2\text{CO}_3$      | 69                     |
| 14    | Graphite rod as anode                                             | 25                     |
| 15    | Pt plate as anode                                                 | 18                     |
| 16    | Without current                                                   | n.d.                   |

<sup>a</sup>Reaction conditions: undivided cell, RVC anode, Pt cathode, **1a** (0.25 mmol),  $n\text{Bu}_4\text{NBr}$  (0.7 equiv.),  $n\text{Bu}_4\text{NBF}_4$  (0.2 M),  $\text{Cs}_2\text{CO}_3$  (0.5 equiv.), HFIP (4 mL), TFE (1 mL),  $I = 3\text{ mA}$ , 6.5 h (2.9  $\text{Fmol}^{-1}$ ), RT. <sup>b</sup>Yield determined by  $^1\text{H-NMR}$  analysis using nitromethane as the internal standard.

Table S2. Screening of mediator.<sup>[a]</sup>

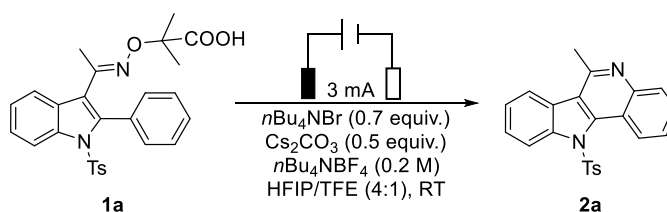

| entry | Deviation from standard conditions                                  | Yield (%) <sup>b</sup> |
|-------|---------------------------------------------------------------------|------------------------|
| 1     | None                                                                | 82                     |
| 2     | NaBr instead of <i>n</i> Bu <sub>4</sub> NBr                        | 54                     |
| 3     | KBr instead of <i>n</i> Bu <sub>4</sub> NBr                         | 59                     |
| 4     | <i>n</i> Bu <sub>4</sub> NI instead of <i>n</i> Bu <sub>4</sub> NBr | 8                      |
| 5     | NaI instead of <i>n</i> Bu <sub>4</sub> NBr                         | 41                     |
| 6     | KI instead of <i>n</i> Bu <sub>4</sub> NBr                          | 47                     |
| 7     | TEMPO instead of <i>n</i> Bu <sub>4</sub> NBr                       | 0                      |
| 8     | Cp <sub>2</sub> Fe instead of <i>n</i> Bu <sub>4</sub> NBr          | 0                      |

<sup>a</sup>standard conditions: undivided cell, RVC anode (100 PPI, 1.0 cm x 1.0 cm x 0.5 cm), Pt cathode (1 cm x 1.5 cm), substrate (0.25 mmol), *n*Bu<sub>4</sub>NBr (0.7 equiv.), *n*Bu<sub>4</sub>NBF<sub>4</sub> (0.2 M), Cs<sub>2</sub>CO<sub>3</sub> (0.5 equiv.), HFIP (4 mL), TFE (1 mL), *I* = 3 mA, 6.5 h (2.9 Fmol<sup>-1</sup>), RT. <sup>b</sup>Yield determined by <sup>1</sup>H-NMR analysis using nitromethane as the internal standard.

### 3. Synthesis and Characterization of Starting Substrates

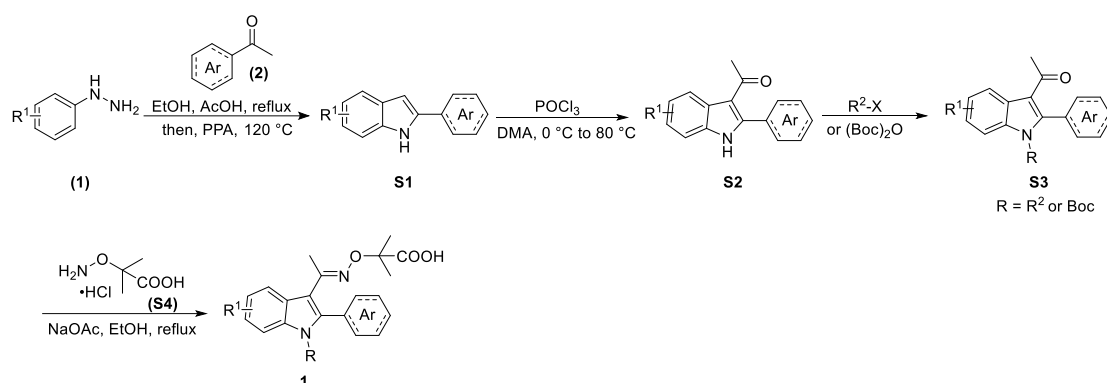

The various 2-phenyl-1H-indoles **S1** were prepared according to reported method<sup>[1]</sup>: Appropriate amounts of substituted acetophenone **2** and phenyl hydrazine **1** (1 equiv.) were mixed in ethanol, and a few drops of glacial acetic acid was added. The solution was heated under reflux at 80 °C for 1–2 h. The solvent was evaporated in vacuum to give a solid that was added to polyphosphoric acid, and the mixture was slowly heated to 120 °C and kept at this temperature for a few hours until the reaction was complete (TLC monitoring). The mixture was allowed to cool and then poured into cold water. The acidic solution was neutralized by the slow addition of NaOH (1 M), and the solid precipitate of the crude product was collected. Purification by column chromatography gave the intermediates **S1**.

1-(2-aryl-1H-indol-3-yl)ethan-1-ones **S2** were prepared according to reported method<sup>[2]</sup>: *N,N*-Dimethyl acetamide (DMA, 10 equiv.) was cooled to 0 °C. Then, POCl<sub>3</sub> (5 equiv.) and the intermediates **S1** (1 equiv.) in DMA were added via syringe. The reaction mixture was heated to 80 °C for 2 h. The cooled solution was then poured onto water and washed with ethyl acetate. The aqueous phase was treated with NaOH (2 M) to precipitate the product. The solids were isolated through vacuum filtration. The residual solvent and moisture in the solid were further removed under reduced pr-

essure to give the intermediates **S2**.

The different *N*-protected 1-(2-phenyl-1H-indol-3-yl)ethan-1-ones **S3** were prepared according to reported method;<sup>[4-6]</sup> and 2-(aminooxy)-2-methylpropanoic acid hydrochloride **S4** were prepared according to previous report.<sup>[7]</sup>

The starting substrates **1a-1p**, **1s** and **1ya-1yc** were synthesized according to the following procedures: <sup>[8]</sup> 2-(aminooxy)-2-methylpropanoic acid hydrochloride (1.2 equiv.) and NaOAc (2.4 equiv.) were added to a stirred solution of the corresponding ketone (1.0 equiv.) in EtOH (0.2 M). The mixture was then heated to reflux until complete by TLC analysis (4 – 6 hours). The reaction was cooled to room temperature, quenched with H<sub>2</sub>O and extracted with ethyl acetate. The combined organic extracts were then washed with H<sub>2</sub>O and brine, then dried over MgSO<sub>4</sub> and concentrated in vacuo. The residue was purified by flash column chromatography on silica gel to give desired products **1a-1p**, **1s** and **1ya-1yc**.

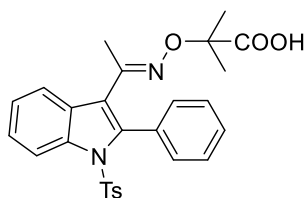

**(E)-2-methyl-2-(((1-(2-phenyl-1-tosyl-1H-indol-3-yl)ethylidene)amino)oxy)propanoic acid (1a):** Yield = 75% (**S3-1a**); White solid; Only one set of peaks was observed in the <sup>1</sup>H and <sup>13</sup>C NMR: <sup>1</sup>H NMR (500 MHz, DMSO-*d*<sub>6</sub>) δ 12.63 (s, 1H), 8.23 (d, *J* = 8.3 Hz, 1H), 7.79 (d, *J* = 7.8 Hz, 1H), 7.55 – 7.45 (m, 4H), 7.40 – 7.30 (m, 7H), 2.29 (s, 3H), 1.52 (s, 3H), 1.41 (s, 6H); <sup>13</sup>C NMR (126 MHz, DMSO-*d*<sub>6</sub>) δ 175.4, 150.9, 146.0, 139.2, 136.2, 134.8, 131.9, 131.2, 130.5, 129.8, 128.6, 128.1, 127.0, 126.0, 124.9, 121.9, 120.7, 115.6, 81.3, 24.4, 21.5, 15.2.

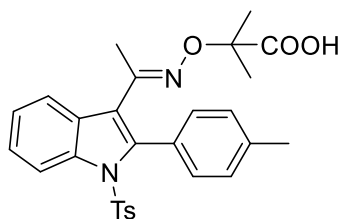

**(E)-2-methyl-2-(((1-(2-(p-tolyl)-1-tosyl-1H-indol-3-yl)ethylidene)amino)oxy)propanoic acid (1b):** Yield = 81% (**S3-1b**); White solid; Only one set of peaks was observed in the <sup>1</sup>H and <sup>13</sup>C NMR: <sup>1</sup>H NMR (400 MHz, CDCl<sub>3</sub>) δ 8.36 (d, *J* = 8.4 Hz, 1H), 7.75 (d, *J* = 7.0 Hz, 1H), 7.34 – 7.23 (m, 8H), 7.06 (d, *J* = 8.1 Hz, 2H), 2.46 (s, 3H), 2.31 (s, 3H), 1.70 (s, 3H), 1.57 (s, 6H); <sup>13</sup>C NMR (101 MHz, CDCl<sub>3</sub>) δ 178.2, 153.8, 144.9, 139.5, 139.4, 136.6, 135.5, 131.8, 129.5, 129.1, 128.4, 128.3, 127.9, 127.0, 125.3, 124.4, 121.0, 120.0, 115.6, 81.4, 24.2, 21.5, 15.5.

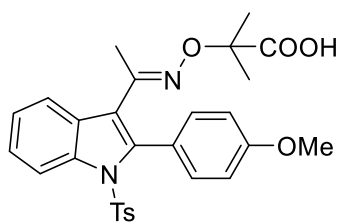

**2-(((1-(2-(4-methoxyphenyl)-1-tosyl-1H-indol-3-yl)ethylidene)amino)oxy)-2-methylpropanoic acid (1c):** Yield = 77% (**S3-1c**); White solid; *E*:*Z* = 6.5:1; Data of the mixture of *E*- and *Z*-isomers:  $^1\text{H}$  NMR (500 MHz,  $\text{CDCl}_3$ )  $\delta$  8.33 – 8.29 (m, 1H), 7.74 – 7.72 (m, 1H), 7.28 – 7.21 (m, 6H), 6.99 (d,  $J$  = 8.2 Hz, 2H), 6.91 (d,  $J$  = 8.7 Hz, 2H), 3.86 (s, 2.6H, *E*-isomer), 3.84 (s, 0.4H, *Z*-isomer), 2.25 (s, 2.6H, *E*-isomer), 2.23 (s, 0.4H, *Z*-isomers), 1.66 (s, 3H), 1.55 (s, 6H);  $^{13}\text{C}$  NMR (126 MHz,  $\text{CDCl}_3$ )  $\delta$  179.0, 178.8, 160.5, 160.4, 153.5, 151.5, 144.8, 144.5, 139.2, 137.6, 137.5, 136.6, 135.5, 134.5, 133.3, 129.4, 129.1, 129.0, 128.4, 126.9, 126.8, 125.3, 125.0, 124.5, 124.4, 123.0, 122.9, 121.0, 120.30, 120.26, 120.1, 117.0, 115.6, 113.2, 113.0, 81.3, 80.8, 55.32, 55.25, 24.2, 23.9, 21.53, 21.45, 19.9, 15.5.

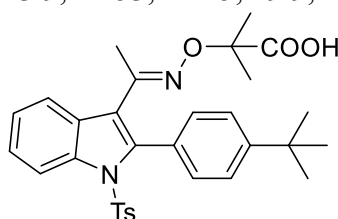

**2-(((1-(2-(4-(tert-butyl)phenyl)-1-tosyl-1H-indol-3-yl)ethylidene)amino)oxy)-2-methylpropanoic acid (1d):** Yield = 79% (**S3-1d**); White solid; *E*:*Z* = 5:1; Data of the mixture of *E*- and *Z*-isomers:  $^1\text{H}$  NMR (400 MHz,  $\text{DMSO}-d_6$ )  $\delta$  12.58 (s, 1H), 8.22 – 8.12 (m, 1H), 7.75 (d,  $J$  = 7.9 Hz, 1H), 7.48 – 7.46 (m, 2H), 7.42 (d,  $J$  = 8.3 Hz, 1H), 7.39 – 7.36 (m, 2H), 7.33 (d,  $J$  = 7.6 Hz, 1H), 7.29 – 7.21 (m, 4H), 2.30 (s, 2.5H, *E*-isomer), 2.25 (s, 0.5H, *Z*-isomer), 1.60 (s, 0.5H, *Z*-isomer), 1.52 (s, 2.5H, *E*-isomer), 1.38 (s, 5H, *E*-isomer), 1.36 (s, 9H), 1.12 (s, 1H, *Z*-isomer);  $^{13}\text{C}$  NMR (126 MHz,  $\text{CDCl}_3$ )  $\delta$  179.0, 153.4, 152.5, 152.4, 144.7, 144.5, 139.3, 137.9, 137.5, 136.7, 135.6, 134.5, 131.7, 130.4, 129.4, 129.1, 128.3, 127.7, 127.1, 126.8, 125.2, 125.1, 124.6, 124.4, 124.3, 121.0, 120.3, 120.0, 116.9, 115.5, 81.3, 80.9, 34.8, 31.4, 24.2, 23.9, 21.54, 21.47, 20.0, 15.5.

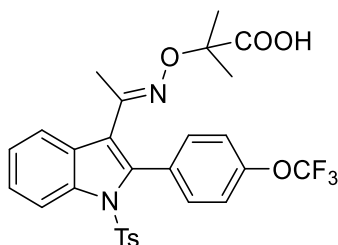

**2-methyl-2-(((1-(1-tosyl-2-(4-(trifluoromethoxy)phenyl)-1H-indol-3-yl)ethylidene)amino)oxy)propanoic acid (1e):** Yield = 80% (**S3-1e**); White solid; *E*:*Z* = 5:1; Data of the mixture of *E*- and *Z*-isomers:  $^1\text{H}$  NMR (500 MHz,  $\text{CDCl}_3$ )  $\delta$  8.34 – 8.30 (m, 1H), 7.70 (d,  $J$  = 7.3 Hz, 1H), 7.32 – 7.19 (m, 8H), 7.02 (d,  $J$  = 8.1 Hz, 2H), 2.27 (s, 2.5H, *E*-isomer), 2.24 (s, 0.5H, *Z*-isomer), 1.74 (s, 2.5H, *E*-isomer), 1.68 (s, 0.5H, *Z*-isomer), 1.50 (s, 5H, *E*-isomer), 1.31 (s, 1H, *Z*-isomer);  $^{19}\text{F}$  NMR (471 MHz,  $\text{CDCl}_3$ )  $\delta$  -57.6, -

57.7.

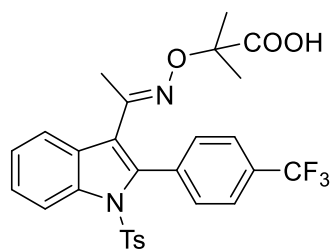

**2-methyl-2-(((1-(1-tosyl-2-(4-(trifluoromethyl)phenyl)-1H-indol-3-yl)ethylidene)amino)oxy)propanoic acid (1f):** Yield = 71% (**S3-1f**); White solid; *E:Z* = 14:1; Data of the mixture of *E*- and *Z*-isomers:  $^1\text{H}$  NMR (500 MHz,  $\text{CDCl}_3$ )  $\delta$  8.32 (d,  $J$  = 8.2 Hz, 1H), 7.69 (d,  $J$  = 7.4 Hz, 1H), 7.65 (d,  $J$  = 8.2 Hz, 2H), 7.45 (d,  $J$  = 8.0 Hz, 2H), 7.32 – 7.25 (m, 4H), 7.03 (d,  $J$  = 8.2 Hz, 2H), 2.27 (s, 2.8H, *E*-isomer), 2.24 (s, 0.2H, *Z*-isomer), 1.72 (s, 2.8H, *E*-isomer), 1.64 (s, 0.2H, *Z*-isomer), 1.49 (s, 6H);  $^{19}\text{F}$  NMR (471 MHz,  $\text{CDCl}_3$ )  $\delta$  -62.6, -62.6.

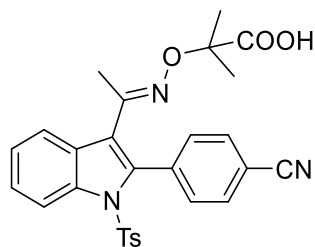

**2-(((1-(2-(4-cyanophenyl)-1-tosyl-1H-indol-3-yl)ethylidene)amino)oxy)-2-methylpropanoic acid (1g):** Yield = 68% (**S3-1g**); yellow solid; *E:Z* = 4:1; Data of the mixture of *E*- and *Z*-isomers:  $^1\text{H}$  NMR (500 MHz,  $\text{CDCl}_3$ )  $\delta$  8.30 (d,  $J$  = 8.3 Hz, 1H), 7.69 – 7.67 (m, 3H), 7.47 (d,  $J$  = 8.1 Hz, 2H), 7.34 – 7.31 (m, 1H), 7.29 – 7.26 (m, 3H), 7.06 (d,  $J$  = 8.2 Hz, 2H), 2.29 (s, 2.4H, *E*-isomer), 2.24 (s, 0.6H, *Z*-isomer), 1.75 (s, 2.4H, *E*-isomer), 1.66 (s, 0.6H, *Z*-isomer), 1.51 (s, 6H);  $^{13}\text{C}$  NMR (126 MHz,  $\text{CDCl}_3$ )  $\delta$  179.4, 151.6, 149.8, 145.4, 145.0, 137.9, 136.8, 136.2, 136.0, 135.5, 135.0, 134.9, 133.9, 132.5, 131.2, 129.7, 129.3, 128.7, 128.4, 126.8, 126.6, 126.1, 125.0, 124.7, 123.0, 121.9, 121.2, 120.5, 118.5, 117.0, 115.7, 112.9, 112.5, 81.4, 80.9, 24.1, 21.6, 21.5, 20.0, 15.9.

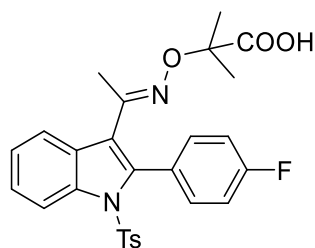

**2-(((1-(2-(4-fluorophenyl)-1-tosyl-1H-indol-3-yl)ethylidene)amino)oxy)-2-methylpropanoic acid (1h):** Yield = 61% (**S3-1h**); White solid; *E:Z* = 2.8:1; Data of the mixture of *E*- and *Z*-isomers:  $^1\text{H}$  NMR (400 MHz,  $\text{CDCl}_3$ )  $\delta$  8.37 – 8.33 (m, 1H), 7.74 (d,  $J$  = 7.6 Hz, 0.6H), 7.43 – 7.29 (m, 6H), 7.24 (d,  $J$  = 8.0 Hz, 0.4H), 7.13 – 7.04 (m, 4H), 2.31 (s, 2.2 H, *E*-isomer), 2.28 (s, 0.8H, *Z*-isomer), 1.74 (s, 2.2 H, *E*-isomer), 1.70 (s, 0.8H, *Z*-isomer), 1.56 (s, 4.4 H, *E*-isomer), 1.31 (s, 1.6 H, *Z*-isomer);  $^{19}\text{F}$  NMR (471 MHz,  $\text{CDCl}_3$ )  $\delta$  -111.1, -111.3.

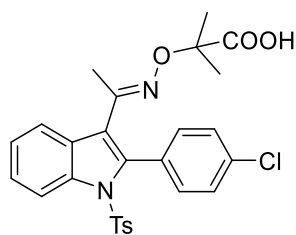

**2-(((1-(2-(4-chlorophenyl)-1-tosyl-1H-indol-3-yl)ethylidene)amino)oxy)-2-methylpropanoic acid (1i):** Yield = 66% (**S3-1i**); White solid; *E:Z* = 2.7:1; Data of the mixture of *E*- and *Z*-isomers:  $^1\text{H}$  NMR (400 MHz,  $\text{CDCl}_3$ )  $\delta$  8.37 – 8.33 (m, 1H), 7.73 (d,  $J$  = 7.7 Hz, 1H), 7.41 – 7.26 (m, 8H), 7.10 – 7.04 (m, 2H), 2.32 (s, 2.2 H, *E*-isomer), 2.28 (s, 0.8 H, *Z*-isomer), 1.75 (s, 2.2 H, *E*-isomer), 1.71 (s, 0.8 H, *Z*-isomer), 1.56 (s, 4.4 H, *E*-isomer), 1.31 (s, 1.6 H, *Z*-isomer);  $^{13}\text{C}$  NMR (101 MHz,  $\text{CDCl}_3$ )  $\delta$  178.1, 153.0, 151.1, 145.2, 144.8, 137.60, 137.56, 136.7, 136.1, 135.7, 135.5, 135.3, 133.1, 129.6, 129.4, 129.2, 128.7, 128.2, 126.9, 126.7, 125.7, 125.6, 124.7, 124.5, 121.3, 121.0, 120.7, 120.3, 117.0, 115.6, 81.4, 81.0, 24.2, 23.8, 21.6, 21.5, 20.0, 15.8.

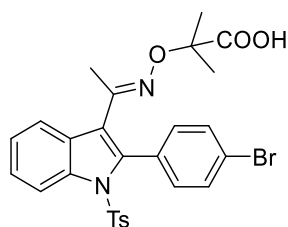

**2-(((1-(2-(4-bromophenyl)-1-tosyl-1H-indol-3-yl)ethylidene)amino)oxy)-2-methylpropanoic acid (1j):** Yield = 64% (**S3-1j**); White solid; *E:Z* = 2.7:1; Data of the mixture of *E*- and *Z*-isomers:  $^1\text{H}$  NMR (400 MHz,  $\text{CDCl}_3$ )  $\delta$  8.37 – 8.33 (m, 1H), 7.72 (d,  $J$  = 7.8 Hz, 1H), 7.58 – 7.55 (m, 2H), 7.45 – 7.29 (m, 4H), 7.25 – 7.20 (m, 2H), 7.10 – 7.04 (m, 2H), 2.33 (s, 2.2H, *E*-isomer), 2.28 (s, 0.8H, *Z*-isomer), 1.76 (s, 2.2H, *E*-isomer), 1.71 (s, 0.8H, *Z*-isomer), 1.55 (s, 4.4H, *E*-isomer), 1.29 (s, 1.6H, *Z*-isomer);  $^{13}\text{C}$  NMR (101 MHz,  $\text{CDCl}_3$ )  $\delta$  177.5, 153.1, 151.3, 145.2, 144.8, 137.6, 136.7, 135.3, 133.4, 131.0, 130.8, 129.8, 129.6, 129.2, 128.6, 128.2, 126.9, 126.7, 125.7, 125.6, 124.7, 124.6, 124.0, 123.8, 121.0, 120.6, 120.2, 119.9, 117.0, 115.6, 81.5, 81.0, 24.2, 24.0, 21.6, 21.5, 20.0, 15.9.

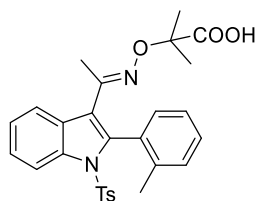

**2-methyl-2-(((1-(2-(o-tolyl)-1-tosyl-1H-indol-3-yl)ethylidene)amino)oxy)propanoic acid (1k):** Yield = 64% (**S3-1k**); White solid; *E:Z* = 1:1; Data of the mixture of *E*- and *Z*-isomers:  $^1\text{H}$  NMR (500 MHz,  $\text{CDCl}_3$ )  $\delta$  8.36 (d,  $J$  = 8.3 Hz, 1H), 7.78 (d,  $J$  = 7.7 Hz, 1H), 7.37 – 7.33 (m, 3H), 7.31 – 7.22 (m, 3H), 7.18 – 7.15 (m, 1H), 7.06 (d,  $J$  = 8.1 Hz, 2H), 6.99 (d,  $J$  = 7.4 Hz, 1H), 2.30 (s, 3H), 2.05 (s, 3H), 1.68 (s, 3H), 1.50 (s, 3H), 1.48 (s, 3H);  $^{13}\text{C}$  NMR (126 MHz,  $\text{CDCl}_3$ )  $\delta$  178.6, 153.2, 145.0, 144.8, 140.0, 139.6, 138.2, 136.4, 135.9, 131.9, 130.6, 129.74, 129.70, 129.5, 128.3, 128.0, 127.2, 126.9, 125.3, 125.1, 124.8, 124.2, 121.3, 120.9, 119.4, 115.1, 81.3, 81.0, 24.2, 24.1, 24.0, 23.8, 21.6, 21.5, 20.2, 14.8.

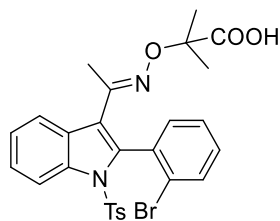

**2-(((1-(2-bromophenyl)-1-tosyl-1H-indol-3-yl)ethylidene)amino)oxy)-2-methylpropanoic acid (1l):** Yield = 68% (**S3-1l**); White solid; *E:Z* = 1:1; Data of the mixture of *E*- and *Z*-isomers:  $^1\text{H}$  NMR (500 MHz,  $\text{CDCl}_3$ )  $\delta$  8.30 (d,  $J$  = 8.4 Hz, 1H), 7.79 (d,  $J$  = 7.8 Hz, 1H), 7.61 (d,  $J$  = 7.9 Hz, 1H), 7.45 (d,  $J$  = 8.3 Hz, 2H), 7.34 – 7.25 (m, 5H), 7.10 (d,  $J$  = 8.2 Hz, 2H), 2.30 (s, 3H), 1.82 (s, 3H), 1.50 (s, 3H), 1.44 (s, 3H);  $^{13}\text{C}$  NMR (126 MHz,  $\text{CDCl}_3$ )  $\delta$  178.8, 152.6, 145.2, 144.9, 136.6, 136.1, 135.7, 135.4, 135.1, 133.9, 132.9, 132.63, 132.56, 132.4, 130.9, 129.7, 129.4, 127.7, 127.2, 126.9, 126.6, 126.5, 125.6, 125.4, 124.2, 124.0, 121.5, 120.0, 115.0, 81.4, 81.0, 24.2, 24.14, 24.07, 23.7, 21.6, 21.6, 14.9.

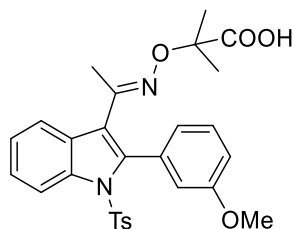

**2-(((1-(2-methoxyphenyl)-1-tosyl-1H-indol-3-yl)ethylidene)amino)oxy)-2-methylpropanoic acid (1m):** Yield = 72% (**S3-1m**); White solid; *E:Z* = 4:1; Data of the mixture of *E*- and *Z*-isomers:  $^1\text{H}$  NMR (500 MHz,  $\text{CDCl}_3$ )  $\delta$  8.33 (d,  $J$  = 8.0 Hz, 1H), 7.74 (d,  $J$  = 8.2 Hz, 1H), 7.31 – 7.27 (m, 5H), 7.03 – 6.98 (m, 3H), 6.89 (d,  $J$  = 7.5 Hz, 1H), 6.81 (s, 1H), 3.80 (s, 0.6H, *Z*-isomer), 3.77 (s, 2.4H, *E*-isomer), 2.27 (s, 2.4H, *E*-isomer), 2.24 (s, 0.6H, *Z*-isomer), 1.70 (s, 2.4H, *E*-isomer), 1.67 (s, 0.6H, *Z*-isomer), 1.53 (s, 4.8H, *E*-isomer), 1.28 (s, 1.2H, *Z*-isomer);  $^{13}\text{C}$  NMR (126 MHz,  $\text{CDCl}_3$ )  $\delta$  178.7, 178.6, 158.8, 158.6, 153.2, 151.3, 144.9, 144.6, 140.6, 138.8, 137.6, 137.4, 136.7, 135.5, 134.4, 132.02, 131.95, 129.5, 129.3, 129.1, 128.8, 128.7, 128.5, 128.3, 127.0, 126.8, 126.5, 125.4, 125.3, 124.54, 124.50, 124.4, 121.1, 120.9, 120.5, 120.1, 117.3, 117.0, 115.5, 115.4, 81.3, 80.9, 55.32, 55.29, 24.2, 23.9, 21.54, 21.47, 19.9, 15.4.

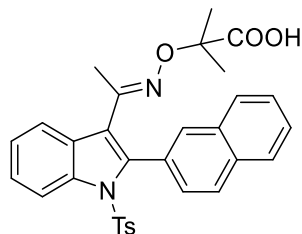

**2-methyl-2-(((1-(2-naphthalen-2-yl)-1-tosyl-1H-indol-3-yl)ethylidene)amino)oxy)propanoic acid (1n):** Yield = 75% (**S3-1n**); White solid; *E:Z* = 2:1; Data of the mixture of *E*- and *Z*-isomers:  $^1\text{H}$  NMR (500 MHz,  $\text{CDCl}_3$ )  $\delta$  8.38 – 8.34 (m, 1H), 7.91 – 7.84 (m, 2H), 7.78 (d,  $J$  = 7.8 Hz, 2H), 7.61 (s, 1H), 7.58 – 7.51 (m, 3H), 7.36 – 7.27 (m, 2H), 7.25 – 7.21 (m, 2H), 7.00 – 6.97 (m, 2H), 2.26 (s, 2H, *E*-isomer), 2.24 (s, 1H,

Z-isomer), 1.63 (s, 2H, *E*-isomer), 1.61 (s, 1H, Z-isomer), 1.50 (s, 4H, *E*-isomer), 1.33 (s, 2H, Z-isomer);  $^{13}\text{C}$  NMR (126 MHz,  $\text{CDCl}_3$ )  $\delta$  178.1, 153.5, 151.5, 145.0, 144.7, 139.1, 137.7, 137.4, 136.7, 135.4, 134.4, 133.5, 133.4, 132.6, 132.3, 131.3, 129.5, 129.3, 129.1, 128.9, 128.50, 128.45, 128.4, 128.3, 127.89, 127.85, 127.1, 127.01, 126.98, 126.9, 126.8, 126.5, 126.4, 125.5, 125.4, 124.6, 124.5, 121.2, 120.7, 120.4, 117.0, 115.6, 81.4, 81.0, 24.2, 23.9, 21.6, 21.5, 19.9, 15.7.

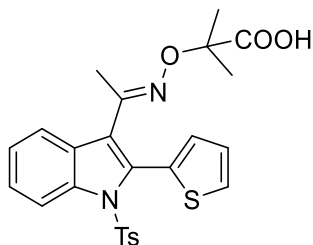

**2-methyl-2-(((1-(2-(thiophen-2-yl)-1-tosyl-1H-indol-3-yl)ethylidene)amino)oxy)propanoic acid (1o):** Yield = 75% (**S3-1o**); White solid; *E:Z* = 5:1; Data of the mixture of *E*- and *Z*-isomers:  $^1\text{H}$  NMR (500 MHz,  $\text{CDCl}_3$ )  $\delta$  8.32 (d,  $J$  = 8.2 Hz, 1H), 7.74 (d,  $J$  = 8.2 Hz, 1H), 7.49 (d,  $J$  = 4.3 Hz, 1H), 7.35 (d,  $J$  = 8.3 Hz, 2H), 7.31 – 7.28 (m, 1H), 7.27 – 7.24 (m, 1H), 7.12 – 7.11 (m, 1H), 7.08 – 7.07 (m, 1H), 7.03 (d,  $J$  = 8.1 Hz, 2H), 2.27 (s, 2.5H, *E*-isomer), 2.26 (s, 0.5H, Z-isomer), 1.77 (s, 2.5H, *E*-isomer), 1.73 (s, 0.5H, Z-isomer), 1.55 (s, 5H, *E*-isomer), 1.29 (s, 1H, Z-isomer);  $^{13}\text{C}$  NMR (126 MHz,  $\text{CDCl}_3$ )  $\delta$  179.2, 178.8, 153.0, 150.9, 145.0, 144.7, 137.5, 136.9, 135.5, 134.6, 132.8, 131.3, 130.9, 130.6, 130.3, 130.1, 129.6, 129.4, 129.3, 129.0, 128.3, 127.8, 127.0, 126.8, 126.8, 126.6, 125.8, 125.6, 124.5, 124.4, 122.3, 121.9, 121.3, 120.7, 116.7, 81.4, 81.0, 24.2, 23.9, 21.6, 21.5, 19.9, 14.9.

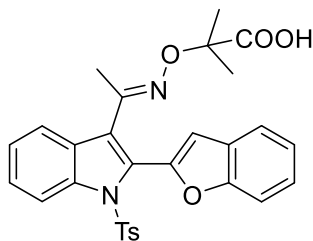

**2-(((1-(2-(benzofuran-2-yl)-1-tosyl-1H-indol-3-yl)ethylidene)amino)oxy)-2-methylpropanoic acid (1p):** Yield = 64% (**S3-1p**); White solid; *E:Z* = 5:1; Data of the mixture of *E*- and *Z*-isomers:  $^1\text{H}$  NMR (400 MHz,  $\text{DMSO}-d_6$ )  $\delta$  12.67 (s, 1H), 8.21 – 8.13 (m, 1H), 7.89 (d,  $J$  = 8.0 Hz, 1H), 7.79 (d,  $J$  = 7.7 Hz, 1H), 7.73 – 7.70 (m, 3H), 7.55 – 7.50 (m, 1H), 7.47 – 7.43 (m, 1H), 7.41 – 7.35 (m, 4H), 7.30 (d,  $J$  = 0.8 Hz, 1H), 2.33 (s, 2.5H, *E*-isomer), 2.31 (s, 0.5H, Z-isomer), 1.84 (s, 0.5H, Z-isomer), 1.75 (s, 2.5H, *E*-isomer), 1.43 (s, 5H, *E*-isomer), 1.16 (s, 1H, Z-isomer);  $^{13}\text{C}$  NMR (126 MHz,  $\text{CDCl}_3$ )  $\delta$  179.3, 155.4, 155.2, 152.3, 145.5, 145.2, 145.0, 144.8, 137.3, 136.8, 135.4, 134.9, 129.7, 129.4, 128.1, 128.0, 127.8, 127.7, 127.6, 127.2, 127.1, 126.6, 126.4, 126.3, 125.5, 125.4, 124.4, 123.8, 123.2, 122.2, 121.71, 121.65, 121.2, 116.1, 115.1, 112.1, 111.51, 111.45, 110.4, 81.5, 81.1, 24.2, 23.9, 21.61, 21.56, 20.6, 15.2.

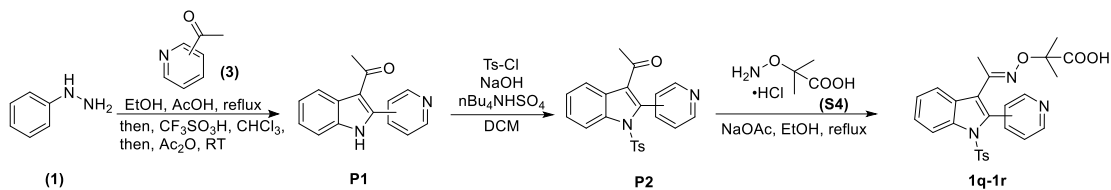

The intermediates **P1** were prepared according to the reported method<sup>[3]</sup>: Appropriate amounts of compounds **3** and phenyl hydrazine **1** (1 equiv.) were mixed in ethanol, and a few drops of glacial acetic acid was added. The solution was heated under reflux at 80 °C for 1–2 h. The solvent was evaporated in vacuo, to give a solid that was then added to CHCl<sub>3</sub> (0.3M), and the resulting mixture was added CF<sub>3</sub>SO<sub>3</sub>H (12 equiv.) and stirred at RT for 12 h. Ac<sub>2</sub>O (2 equiv.) was then added to the above mixture and stirred at RT for 8h. The reaction was quenched with H<sub>2</sub>O and extracted with CHCl<sub>3</sub>. The combined organic extracts were then washed with H<sub>2</sub>O and brine, then dried over MgSO<sub>4</sub>. After the removal of the solvent, the residue was purified by flash column chromatography on silica gel to give intermediates **P1**

The intermediates **P2** were prepared according to the reported method<sup>[4]</sup>. The starting substrates **1q-1r** were synthesized according to the following procedures:<sup>[8]</sup> 2-(aminooxy)-2-methylpropanoic acid hydrochloride (1.2 equiv.) and NaOAc (2.4 equiv.) were added to a stirred solution of the corresponding ketone (1.0 equiv.) in EtOH (0.2 M). The mixture was then heated to reflux until complete by TLC analysis (4 – 6 hours). The reaction was cooled to room temperature, the cooled reaction solution was poured into water to precipitate the product. The solids were isolated through vacuum filtration. The residual solvent and moisture in the solid were further removed under reduced pressure to give the products **1q-1r**.

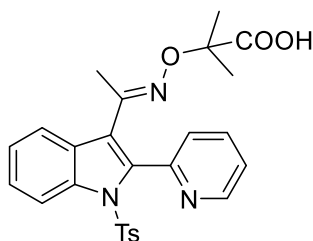

**(E)-2-methyl-2-(((1-(2-(pyridin-2-yl)-1-tosyl-1H-indol-3-yl)ethylidene)amino)oxy)propanoic acid (1q):** Yield = 83% (**P2-1q**); White solid; Only one set of peaks was observed in the <sup>1</sup>H and <sup>13</sup>C NMR: <sup>1</sup>H NMR (500 MHz, DMSO-*d*<sub>6</sub>) δ 12.61 (br s, 1H), 8.75 (d, *J* = 4.3 Hz, 1H), 8.10 (d, *J* = 8.4 Hz, 1H), 7.96 – 7.93 (m, 1H), 7.88 (d, *J* = 7.9 Hz, 1H), 7.80 (d, *J* = 8.1 Hz, 2H), 7.68 (d, *J* = 7.7 Hz, 1H), 7.55 – 7.53 (m, 1H), 7.45 – 7.42 (m, 1H), 7.36 (d, *J* = 8.0 Hz, 2H), 7.33 – 7.30 (m, 1H), 2.31 (s, 3H), 1.56 (s, 3H), 1.40 (s, 6H); <sup>13</sup>C NMR (126 MHz, DMSO-*d*<sub>6</sub>) δ 175.3, 150.9, 150.6, 149.3, 146.0, 138.3, 136.5, 135.5, 134.5, 130.5, 128.2, 127.8, 127.5, 126.3, 125.0, 124.6, 122.7, 120.6, 115.1, 81.4, 24.4, 21.5, 15.1.

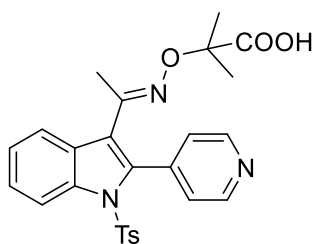

**(*E*)-2-methyl-2-(((1-(2-(pyridin-4-yl)-1-tosyl-1H-indol-3-yl)ethylidene)amino)oxy)propanoic acid (1r):** Yield = 85% (**P2-1r**); White solid; Only one set of peaks was observed in the  $^1\text{H}$  and  $^{13}\text{C}$  NMR:  $^1\text{H}$  NMR (500 MHz,  $\text{DMSO-}d_6$ )  $\delta$  8.70 (d,  $J$  = 5.8 Hz, 2H), 8.19 (d,  $J$  = 8.4 Hz, 1H), 7.75 (d,  $J$  = 7.9 Hz, 1H), 7.50 – 7.45 (m, 5H), 7.37 – 7.32 (m, 3H), 2.30 (s, 3H), 1.68 (s, 3H), 1.36 (s, 6H);  $^{13}\text{C}$  NMR (126 MHz,  $\text{DMSO-}d_6$ )  $\delta$  175.3, 149.9, 149.4, 146.3, 139.4, 136.3, 135.9, 134.2, 130.7, 128.6, 127.0, 126.6, 126.4, 125.2, 122.04, 121.96, 115.6, 81.5, 24.4, 21.5, 15.7.

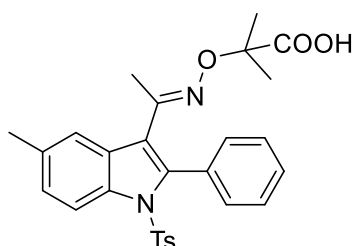

**(*E*)-2-methyl-2-(((1-(5-methyl-2-phenyl-1-tosyl-1H-indol-3-yl)ethylidene)amino)oxy)propanoic acid (1s):** Yield = 79% (**S3-1s**); White solid; Only one set of peaks was observed in the  $^1\text{H}$  and  $^{13}\text{C}$  NMR:  $^1\text{H}$  NMR (400 MHz,  $\text{CDCl}_3$ )  $\delta$  8.21 (d,  $J$  = 8.6 Hz, 1H), 7.50 (s, 1H), 7.45 – 7.41 (m, 1H), 7.38 – 7.35 (m, 2H), 7.30 – 7.28 (m, 4H), 7.17 (d,  $J$  = 8.6 Hz, 1H), 7.04 (d,  $J$  = 8.2 Hz, 2H), 2.36 (s, 3H), 2.27 (s, 3H), 1.66 (s, 3H), 1.47 (s, 6H);  $^{13}\text{C}$  NMR (101 MHz,  $\text{CDCl}_3$ )  $\delta$  178.5, 153.3, 144.9, 139.2, 135.4, 134.8, 134.1, 131.8, 131.0, 129.5, 129.3, 128.6, 127.5, 126.9, 126.8, 120.9, 120.2, 115.3, 81.5, 24.3, 21.6, 21.4, 15.6.

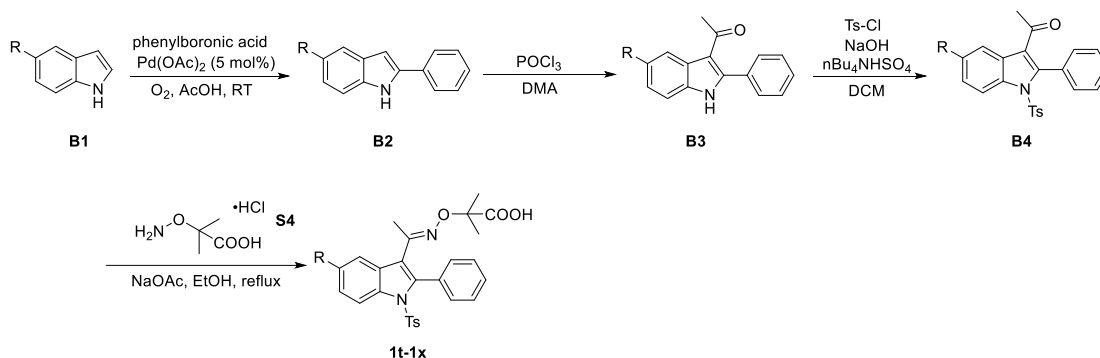

The intermediates **B2** were prepared according to the reported method<sup>[9]</sup>: 5-substituted indoles **B1** (1.0 equiv.), phenyl boronic acid (1.5 equiv.) and  $\text{Pd}(\text{OAc})_2$  (0.05 equiv.) were added to a three-necked flask. After AcOH was added by syringe, the resulting solution was degassed twice and refilled with  $\text{O}_2$  (1.0 atm.). The mixture was stirred for 8 h at room temperature. AcOH was distilled under reduced pressure, and the residue was dissolved in  $\text{CH}_2\text{Cl}_2$  and washed with  $\text{NaHCO}_3$  (aq. Sat.). The organic layer was dried over  $\text{MgSO}_4$ . After the removal of the solvent, the residue was purified by flash column chromatography on silica gel to give intermediates **B2**

The intermediates **B3** and **B4** were prepared according to the reported method.<sup>[2, 4]</sup> The starting substrates **1t–1x** were synthesized according to the following procedures:<sup>[8]</sup> 2-(aminooxy)-2-methylpropanoic acid hydrochloride (1.2 equiv.) and NaOAc (2.4 equiv.) were added to a stirred solution of the corresponding ketone (1.0 equiv.) in EtOH (0.2 M). The mixture was then heated to reflux until complete by TLC analysis (4–6 hours). The reaction was cooled to room temperature, quenched with H<sub>2</sub>O and extracted with ethyl acetate. The combined organic extracts were then washed with H<sub>2</sub>O and brine, then dried over MgSO<sub>4</sub> and concentrated in vacuo. The residue was purified by flash column chromatography on silica gel to give products **1t–1x**.

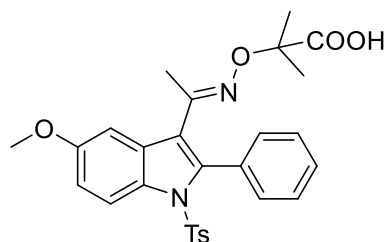

**2-(((1-(5-methoxy-2-phenyl-1-tosyl-1H-indol-3-yl)ethylidene)amino)oxy)-2-methylpropanoic acid (1t):** Yield = 63% (**B4-1t**); white solid; *E*:*Z* = 6.5 :1; Data of the mixture of *E*- and *Z*-isomers: <sup>1</sup>H NMR (500 MHz, CDCl<sub>3</sub>) δ 8.22 (d, *J* = 9.1 Hz, 0.8H), 8.18 (d, *J* = 9.1 Hz, 0.2H), 7.47 – 7.44 (m, 0.8H), 7.40 – 7.37 (m, 2H), 7.31 – 7.19 (m, 5H), 7.05 (d, *J* = 8.2 Hz, 1.7H), 7.01 (d, *J* = 8.2 Hz, 0.3H), 6.97 (dd, *J* = 9.1, 2.6 Hz, 1H), 6.78 – 6.77 (m, 0.2H), 3.78 (s, 0.4H, *Z*-isomers), 3.76 (s, 2.6H, *E*-isomers), 2.28 (s, 2.6H, *E*-isomers), 2.25 (s, 0.4H, *Z*-isomers), 1.61 (s, 3H), 1.54 (s, 5.2H, *E*-isomers), 1.28 (s, 0.8H, *Z*-isomers); <sup>13</sup>C NMR (126 MHz, CDCl<sub>3</sub>) δ 179.1, 178.8, 157.2, 157.1, 153.6, 151.1, 144.9, 144.5, 140.0, 138.4, 135.4, 134.2, 131.9, 131.14, 131.08, 130.9, 130.2, 129.5, 129.4, 129.3, 129.2, 129.1, 127.6, 127.5, 127.0, 126.8, 121.3, 120.2, 117.9, 116.6, 114.8, 114.3, 103.2, 102.7, 81.2, 80.8, 55.6, 24.2, 23.9, 21.6, 21.5, 19.7, 15.3.

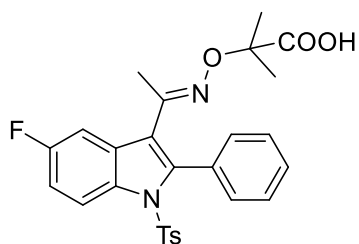

**2-(((1-(5-fluoro-2-phenyl-1-tosyl-1H-indol-3-yl)ethylidene)amino)oxy)-2-methylpropanoic acid (1u):** Yield = 59% (**B4-1u**); white solid; *E*:*Z* = 9 :1; Data of the mixture of *E*- and *Z*-isomers: <sup>1</sup>H NMR (500 MHz, DMSO-*d*<sub>6</sub>) δ 12.71 (s, 1H), 8.26 (dd, *J* = 9.2, 4.6 Hz, 0.9H), 8.18 (dd, *J* = 9.2, 4.5 Hz, 0.1H), 7.60 – 7.54 (m, 2H), 7.51 – 7.48 (m, 2H), 7.40 – 7.34 (m, 4H), 7.33 – 7.26 (m, 3H), 2.31 (s, 2.7H, *E*-isomer), 2.27 (s, 0.3H, *Z*-isomer), 1.57 (s, 0.3H, *Z*-isomer), 1.50 (s, 2.7H, *E*-isomer), 1.44 (s, 5.4H, *E*-isomer), 1.18 (s, 0.6H, *Z*-isomer); <sup>19</sup>F NMR (471 MHz, DMSO-*d*<sub>6</sub>) δ -117.7, -117.8; <sup>13</sup>C NMR (126 MHz, DMSO) δ 175.3, 160.0 (d, *J*<sub>C-F</sub> = 239.4 Hz), 150.8, 148.3, 146.2, 145.7, 141.1, 139.4, 134.6, 133.7, 133.5, 132.6, 131.9, 130.84, 130.75, 130.6, 130.4 (d, *J*<sub>C-F</sub> = 11.3 Hz), 130.1, 129.9, 129.6 (d, *J*<sub>C-F</sub> = 11.3 Hz), 128.1, 127.0, 126.7, 121.1 (d, *J*<sub>C-F</sub> =

3.8 Hz), 120.2 (d,  $J_{\text{C-F}} = 3.8$  Hz), 118.1 (d,  $J_{\text{C-F}} = 8.8$  Hz), 117.2 (d,  $J_{\text{C-F}} = 8.8$  Hz), 113.8 (d,  $J_{\text{C-F}} = 25.2$  Hz), 113.5 (d,  $J_{\text{C-F}} = 25.2$  Hz), 107.6 (d,  $J_{\text{C-F}} = 25.2$  Hz), 106.9 (d,  $J_{\text{C-F}} = 25.2$  Hz), 81.4, 80.8, 24.4, 24.1, 21.5, 21.4, 19.8, 14.9.

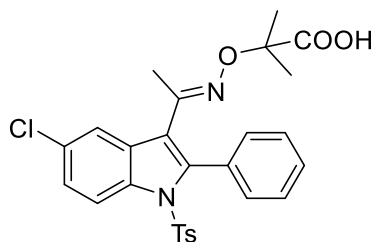

**2-(((1-(5-chloro-2-phenyl-1-tosyl-1H-indol-3-yl)ethylidene)amino)oxy)-2-methylpropanoic acid (1v):** Yield = 68% (**B4-1v**); white solid;  $E:Z = 5:1$ ; Data of the mixture of  $E$ - and  $Z$ -isomers:  $^1\text{H}$  NMR (500 MHz,  $\text{DMSO}-d_6$ )  $\delta$  12.47 (s, 1H), 8.26 (d,  $J = 9.0$  Hz, 0.8H), 8.18 (d,  $J = 8.9$  Hz, 0.2H), 7.88 (d,  $J = 1.9$  Hz, 1H), 7.57 – 7.54 (m, 1H), 7.51 – 7.45 (m, 4H), 7.40 – 7.37 (m, 3H), 7.31 – 7.25 (m, 2H), 2.30 (s, 2.5H,  $E$ -isomer), 2.27 (s, 0.5H,  $Z$ -isomer), 1.58 (s, 0.5H,  $Z$ -isomer), 1.51 (s, 2.5H,  $E$ -isomer), 1.45 (s, 5H,  $E$ -isomer), 1.19 (s, 1H,  $Z$ -isomer);  $^{13}\text{C}$  NMR (126 MHz,  $\text{DMSO}-d_6$ )  $\delta$  175.3, 175.2, 150.8, 148.1, 146.3, 145.8, 140.8, 139.1, 135.5, 134.7, 134.6, 133.8, 131.9, 130.7, 130.6, 130.2, 130.1, 129.8, 129.6, 128.1, 127.0, 126.7, 126.0, 125.7, 121.5, 120.8, 120.4, 119.7, 118.0, 117.1, 81.4, 80.8, 24.4, 24.1, 21.5, 21.4, 19.9, 15.0.

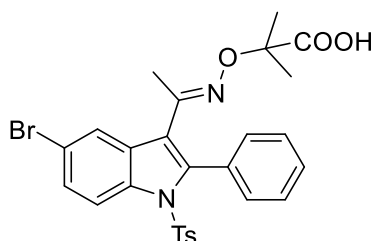

**2-(((1-(5-bromo-2-phenyl-1-tosyl-1H-indol-3-yl)ethylidene)amino)oxy)-2-methylpropanoic acid (1w):** Yield = 62% (**B4-1w**); white solid;  $E:Z = 3.3:1$ ; Data of the mixture of  $E$ - and  $Z$ -isomers:  $^1\text{H}$  NMR (500 MHz,  $\text{DMSO}-d_6$ )  $\delta$  12.62 (s, 1H), 8.20 (d,  $J = 8.9$  Hz, 0.8H), 8.12 (d,  $J = 8.9$  Hz, 0.2H), 8.01 (d,  $J = 1.8$  Hz, 1H), 7.64 – 7.60 (m, 1H), 7.59 – 7.53 (m, 1H), 7.50 – 7.43 (m, 2.5H), 7.39 – 7.35 (m, 3H), 7.32 – 7.27 (m, 2.5H), 2.31 (s, 2.3H,  $E$ -isomer), 2.27 (s, 0.7H,  $Z$ -isomer), 1.57 (s, 0.7H,  $Z$ -isomer), 1.50 (s, 2.3H,  $E$ -isomer), 1.44 (s, 4.6H,  $E$ -isomer), 1.18 (s, 1.4H,  $Z$ -isomer);  $^{13}\text{C}$  NMR (126 MHz,  $\text{DMSO}-d_6$ )  $\delta$  175.3, 175.2, 150.8, 148.1, 146.3, 145.9, 140.6, 138.9, 135.8, 135.0, 134.6, 133.8, 131.9, 130.7, 130.6, 130.5, 130.2, 130.23, 130.18, 129.9, 128.7, 128.4, 128.2, 128.1, 127.0, 126.7, 124.5, 123.9, 120.2, 119.6, 118.3, 117.72, 117.66, 117.5, 81.4, 80.8, 24.4, 24.1, 21.5, 21.4, 19.9, 15.0.

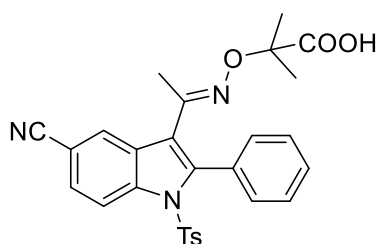

**2-(((1-(5-cyano-2-phenyl-1-tosyl-1H-indol-3-yl)ethylidene)amino)oxy)-2-methylpropanoic acid (1x):** Yield = 68% (**B4-1x**); white solid; *E:Z* = 3 :1; Data of the mixture of *E*- and *Z*-isomers:  $^1\text{H}$  NMR (500 MHz,  $\text{CDCl}_3$ )  $\delta$  8.45 (d,  $J$  = 8.8 Hz, 0.75H), 8.41 (d,  $J$  = 8.7 Hz, 0.25H), 8.21 (s, 0.75H), 7.75 (s, 0.25H), 7.63 – 7.61 (m, 1H), 7.50 – 7.45 (m, 1H), 7.42 – 7.37 (m, 2H), 7.28 – 7.21 (m, 4H), 7.11 (d,  $J$  = 8.2 Hz, 1.5H), 7.07 (d,  $J$  = 8.2 Hz, 0.5H), 2.34 (s, 2.3H, *E*-isomer), 2.30 (s, 0.7H, *Z*-isomer), 1.63 (s, 0.7H, *Z*-isomer), 1.61 (s, 2.3H, *E*-isomer), 1.55 (s, 4.5H, *E*-isomer), 1.31 (s, 1.5H, *Z*-isomer);  $^{13}\text{C}$  NMR (126 MHz,  $\text{CDCl}_3$ )  $\delta$  178.4, 177.9, 151.8, 149.3, 145.7, 145.4, 140.9, 139.6, 139.2, 138.3, 135.2, 134.4, 131.9, 129.9, 129.83, 129.75, 129.5, 128.6, 128.3, 128.1, 128.0, 127.8, 127.7, 127.1, 126.9, 126.8, 125.7, 119.6, 119.5, 119.2, 117.3, 116.2, 107.8, 107.7, 81.5, 81.1, 24.2, 23.9, 21.6, 21.5, 19.8, 15.1.

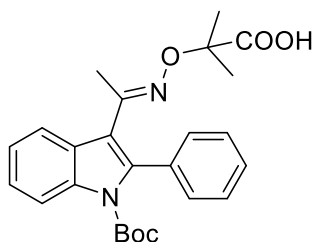

**(*E*)-2-(((1-(1-(tert-butoxycarbonyl)-2-phenyl-1H-indol-3-yl)ethylidene)amino)oxy)-2-methylpropanoic acid (1ya):** Yield = 75% (**S3-1ya**); White solid; Only one set of peaks was observed in the  $^1\text{H}$  and  $^{13}\text{C}$  NMR:  $^1\text{H}$  NMR (500 MHz,  $\text{CDCl}_3$ )  $\delta$  8.22 (d,  $J$  = 8.2 Hz, 1H), 7.77 – 7.75 (m, 1H), 7.40 – 7.38 (m, 3H), 7.36 – 7.34 (m, 2H), 7.33 – 7.31 (m, 1H), 7.28 – 7.25 (m, 1H), 1.83 (s, 3H), 1.55 – 1.54 (m, 6H), 1.22 (s, 9H);  $^{13}\text{C}$  NMR (126 MHz,  $\text{CDCl}_3$ )  $\delta$  149.9, 138.1, 136.4, 133.9, 130.0, 129.2, 128.3, 128.0, 127.6, 125.0, 123.5, 120.5, 117.9, 115.1, 83.8, 81.3, 27.4, 24.3, 15.9.

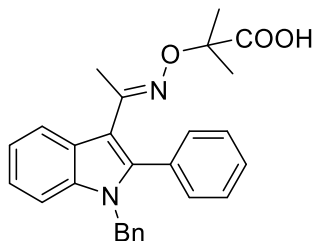

**(*E*)-2-(((1-(1-benzyl-2-phenyl-1H-indol-3-yl)ethylidene)amino)oxy)-2-methylpropanoic acid (1yb):** Yield = 65% (**S3-1yb**); White solid; Only one set of peaks was observed in the  $^1\text{H}$  and  $^{13}\text{C}$  NMR:  $^1\text{H}$  NMR (500 MHz,  $\text{CDCl}_3$ )  $\delta$  7.98 – 7.96 (m, 1H), 7.42 – 7.37 (m, 3H), 7.31 – 7.29 (m, 2H), 7.24 – 7.17 (m, 6H), 6.93 (d,  $J$  = 1.8 Hz, 2H), 5.18 (s, 2H), 1.97 (s, 3H), 1.56 – 1.54 (m, 6H);  $^{13}\text{C}$  NMR (126 MHz,  $\text{CDCl}_3$ )  $\delta$  141.1, 137.4, 136.7, 131.7, 130.7, 129.2, 128.8, 128.7, 128.6, 127.4, 126.1, 123.0, 121.6, 121.2, 110.6, 81.3, 47.6, 24.5, 16.1.

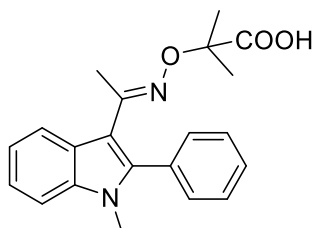

**(*E*)-2-methyl-2-(((1-(1-methyl-2-phenyl-1H-indol-3-yl)ethylidene)amino)oxy)propanoic acid (1yc):** Yield = 77% (**S3-1yc**); White solid; Only one set of peaks was observed in the  $^1\text{H}$  and  $^{13}\text{C}$  NMR:  $^1\text{H}$  NMR (400 MHz,  $\text{CDCl}_3$ )  $\delta$  8.03 – 8.01 (m, 1H), 7.54 – 7.53 (m, 3H), 7.45 – 7.40 (m, 3H), 7.36 – 7.32 (m, 1H), 7.30 – 7.26 (m, 1H), 3.61 (s, 3H), 2.02 (s, 3H), 1.60 (s, 6H);  $^{13}\text{C}$  NMR (101 MHz,  $\text{CDCl}_3$ )  $\delta$  178.0, 155.7, 140.9, 137.1, 132.0, 130.7, 129.0, 128.7, 125.9, 122.8, 121.3, 121.1, 110.8, 109.7, 81.2, 30.8, 24.5, 16.1.

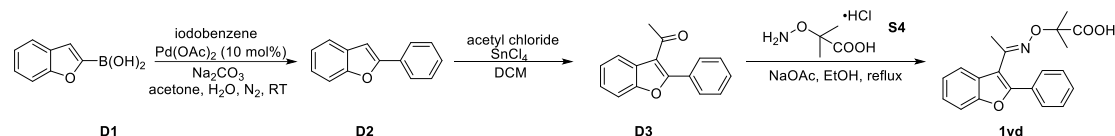

The intermediate **D2** was prepared according to the reported method<sup>[11]</sup>: Into a three-necked flask, benzofuran-2-boronic acid (1 equiv.), iodobenzene (1 equiv.),  $\text{Pd}(\text{OAc})_2$  (0.1 equiv.) and  $\text{Na}_2\text{CO}_3$  (2 equiv.) were placed under Argon, and acetone and water were added. The reaction mixture was stirred at room temperature until full consumption of the starting material was indicated by TLC (8 h). The reaction mixture was quenched with water and extracted with dichloromethane. The combined organic layers were dried over anhydrous  $\text{MgSO}_4$ , filtrated and concentrated to dryness in vacuo. The crude compound was purified by flash chromatography to afford 2-phenylbenzofuran **D2**.

The intermediate **D3** was prepared according to the reported method<sup>[12]</sup>:  $\text{SnCl}_4$  (0.697 g, 2.67 mmol) was added drop-wisely to a mixture of **D2** (0.5 g, 2.57 mmol) and the acetyl chloride (0.26 g, 3.34 mmol) in dry dichloromethane (50 mL). The resulting solution was stirred at room temperature overnight. The reaction was quenched with ice and stirred for 1 h. The organic layer was separated and the aqueous layer was extracted with dichloromethane. The combined organic extracts were washed with brine, dried over sodium sulfate. After the removal of the solvent, the residue was purified by flash column chromatography on silica gel to give intermediate **D3**.

The starting substrate **1yd** was synthesized according to the following procedures:<sup>[8]</sup> 2-(aminooxy)-2-methylpropanoic acid hydrochloride (1.2 equiv.) and  $\text{NaOAc}$  (2.4 equiv.) were added to a stirred solution of the corresponding ketone (1.0 equiv.) in EtOH (0.2 M). The mixture was then heated to reflux until complete by TLC analysis (4 – 6 hours). The reaction was cooled to room temperature, quenched with  $\text{H}_2\text{O}$  and extracted with ethyl acetate. The combined organic extracts were then washed with  $\text{H}_2\text{O}$  and brine, then dried over  $\text{MgSO}_4$ . After the removal of the solvent, the residue was purified by flash column chromatography on silica gel to give product **1yd**.

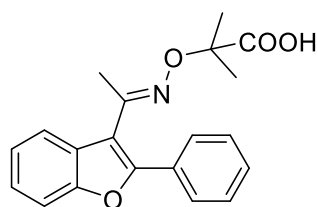

**2-methyl-2-(((1-(2-phenylbenzofuran-3-yl)ethylidene)amino)oxy)propanoic acid (1yd):** Yield = 62% (**D3-1yd**); yellow oil; *E:Z* = 5:1; Data of the mixture of *E*- and *Z*-isomers:  $^1\text{H}$  NMR (500 MHz,  $\text{CDCl}_3$ )  $\delta$  9.46 (br s, 1H), 7.75 – 7.71 (m, 3H), 7.47 – 7.41 (m, 3H), 7.38 – 7.35 (m, 1H), 7.25 – 7.20 (m, 2H), 2.16 (s, 2.5H, *E*-isomer), 2.15 (s, 0.5H, *Z*-isomer), 1.66 (s, 5H, *E*-isomer), 1.42 (s, 1H, *Z*-isomer);  $^{13}\text{C}$  NMR (126 MHz,  $\text{CDCl}_3$ )

$\delta$  179.9, 154.1, 153.9, 152.1, 130.4, 129.3, 129.1, 128.8, 128.6, 128.3, 128.2, 126.9, 125.0, 124.7, 123.4, 123.0, 121.4, 121.3, 114.1, 111.1, 81.5, 81.3, 24.3, 24.0, 20.6, 16.1.

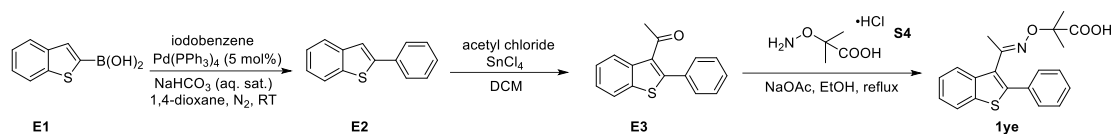

The intermediate **E2** was prepared according to the reported method<sup>[13]</sup>: Phenyl iodide (10.0 mmol, 1.0 eq.) was added under N<sub>2</sub> at RT to a solution of (Ph<sub>3</sub>P)<sub>4</sub>Pd (0.5 mmol, 0.05 eq.) in 1,4-dioxane (80 mL) and stirred for 20 min. NaHCO<sub>3</sub> (aq. Sat., 14 mL) and 1-benzothiophene-2-boronic acid (11.0 mmol, 1.1 eq.) were added and the resulting reaction mixture was refluxed for 1 h. The reaction mixture was then allowed to cool to r.t. and extracted with CH<sub>2</sub>Cl<sub>2</sub> (3×80 mL). The combined organic extracts were washed with NaOH (aq. 1 M, 40 mL) and then with brine, dried over MgSO<sub>4</sub> and concentrated in vacuo to give a brown crystalline solid that was purified by flash chromatography to give the intermediates **E2**.

The intermediate **E3** was prepared according to the reported method<sup>[14]</sup>: Benzothiophene **E2** (0.011 mol) and acetyl chloride (1.29 g, 0.016 mol) were dissolved in dry benzene (100 mL) and the mixture was cooled to 5 °C. Then a solution of SnCl<sub>4</sub> (4.17 g, 0.016 mol) in dry benzene (30 mL) was added drop wisely for 30 min. The reaction mixture was stirred at room temperature for 3 h and acidified with cold 10% aqueous HCl (50 mL). The organic layer was separated, dried over Na<sub>2</sub>SO<sub>4</sub>, and concentrated in vacuo. The residue was purified by flash column chromatography on silica gel to give intermediate **E3**.

The starting substrate **1ye** was synthesized according to the following procedures:<sup>[8]</sup> 2-(aminooxy)-2-methylpropanoic acid hydrochloride (1.2 equiv.) and NaOAc (2.4 equiv.) were added to a stirred solution of the corresponding ketone **E3** (1.0 equiv.) in EtOH (0.2 M). The mixture was then heated to reflux until complete by TLC analysis (4 – 6 hours). The reaction was cooled to room temperature, quenched with H<sub>2</sub>O and extracted with ethyl acetate. The combined organic extracts were then washed with H<sub>2</sub>O and brine, then dried over MgSO<sub>4</sub>. After the removal of the solvent. The residue was purified by flash column chromatography on silica gel to give product **1ye**.

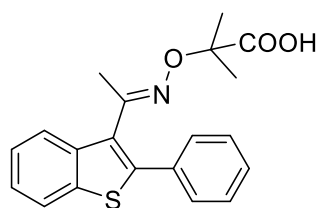

**2-methyl-2-(((1-(2-phenylbenzo[b]thiophen-3-yl)ethylidene)amino)oxy)propanoic acid (1ye)**: Yield = 66% (**E3-1ye**); yellow oil; *E*:*Z* = 5:1; Data of the mixture of *E*- and *Z*-isomers: <sup>1</sup>H NMR (500 MHz, CDCl<sub>3</sub>)  $\delta$  10.52 (br s, 1H), 7.76 – 7.71 (m, 3H), 7.47 – 7.41 (m, 3H), 7.38 – 7.35 (m, 1H), 7.24 – 7.22 (m, 2H), 2.16 (s, 2.5H, *E*-isomer), 2.15 (s, 0.5H, *Z*-isomer), 1.66 (s, 5H, *E*-isomer), 1.42 (s, 1H, *Z*-isomer); <sup>13</sup>C NMR (126 MHz, CDCl<sub>3</sub>)  $\delta$  180.0, 154.1, 153.9, 152.1, 130.4, 129.3, 129.1, 128.8, 128.6, 128.3, 128.2, 126.9, 125.0, 124.7, 123.4, 123.0, 121.4, 121.3, 114.1, 111.1, 81.5, 81.3, 24.3, 24.0, 20.6, 16.1.

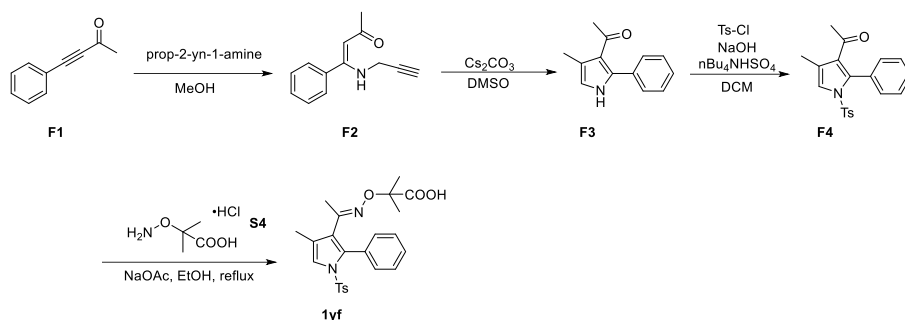

The intermediates **F2** and **F3** were prepared according to the reported method<sup>[15]</sup>: 1-Phenyloct-2-yn-1-one (10.0 mmol) and propargylamine (1.2 mmol) in MeOH (25 mL) were stirred for 6 h at 60°C. The solvent was evaporated and the residue was worked-up with ethyl acetate and a saturated NaCl solution. The organic phase was separated, dried over Na<sub>2</sub>SO<sub>4</sub> filtered and concentrated under reduced pressure to give intermediates **F2**.

A single neck flask, equipped with a magnetic stirrer, was charged with **F2** (2 mmol) and Cs<sub>2</sub>CO<sub>3</sub> (4 mmol) in anhydrous DMSO (30 mL). The reaction mixture was stirred for 10 min under argon at room temperature. Ethyl acetate was added and the resulting mixture was washed with a 0.1 N HCl solution and subsequently with a saturated NaCl solution. The organic phase was separated, dried over Na<sub>2</sub>SO<sub>4</sub>, filtered and concentrated under reduced pressure. The residue was purified by chromatography to give the intermediate **F3**.

The intermediate **F4** was prepared according to the reported method.<sup>[4]</sup> The starting substrate **1yf** was synthesized according to the following procedures:<sup>[8]</sup> 2-(aminooxy)-2-methylpropanoic acid hydrochloride (1.2 equiv.) and NaOAc (2.4 equiv.) were added to a stirred solution of the corresponding ketone (1.0 equiv.) in EtOH (0.2 M). The mixture was then heated to reflux until complete by TLC analysis (4–6 hours). The reaction was cooled to room temperature, quenched with H<sub>2</sub>O and extracted with ethyl acetate. The combined organic extracts were then washed with H<sub>2</sub>O and brine, then dried over MgSO<sub>4</sub>. After the removal of the solvent, the residue was purified by flash column chromatography on silica gel to give product **1yf**.

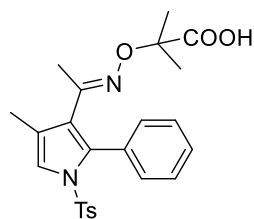

**2-methyl-2-(((1-(4-methyl-2-phenyl-1-tosyl-1H-pyrrol-3-yl)ethylidene)amino)oxy)propanoic acid (1yf):** Yield = 66% (**F4-1yf**); yellow oil; *E:Z* = 6.5:1; Data of the mixture of *E*- and *Z*-isomers: <sup>1</sup>H NMR (500 MHz, CDCl<sub>3</sub>) δ 7.36 – 7.31 (m, 1H), 7.27 – 7.21 (m, 3H), 7.19 – 7.14 (m, 2H), 7.09 – 7.07 (m, 4H), 2.34 (s, 3H), 2.08 (s, 2.6H, *E*-isomer), 1.97 (s, 0.4H, *Z*-isomer), 1.61 (s, 3H), 1.44 (s, 5.2H, *E*-isomer), 1.34 (s, 0.8H, *Z*-isomer); <sup>13</sup>C NMR (126 MHz, CDCl<sub>3</sub>) δ 178.9, 178.7, 153.9, 152.0, 144.8, 144.5, 135.6, 133.4, 132.1, 131.8, 131.0, 130.4, 130.1, 129.5, 129.2, 128.8, 128.6, 127.5, 127.4, 127.0, 125.4, 125.2, 122.2, 121.03, 120.95, 120.2, 81.1, 80.7, 24.1, 23.9, 21.6, 21.5, 20.8, 15.8, 11.8, 10.9.

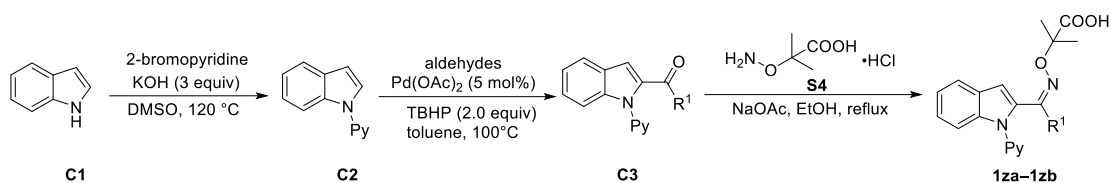

The intermediates **C2** and **C3** were prepared according to the reported method<sup>[10]</sup>. A three-necked flask was charged with the indole **C1** (1 equiv.), KOH (3 equiv.), 2-bromopyridine (2 equiv.), and dry DMSO (0.1 M) under argon atmosphere. The resulting mixture was heated in an oil bath at 120 °C until the end of the reaction. The mixture was quenched with a saturated solution of NH<sub>4</sub>Cl and extracted with ethyl acetate. The organic phase was dried over MgSO<sub>4</sub>, followed by evaporation under reduced pressure to remove the solvent. The product was purified by column chromatography on silica gel to afford 1-(pyridin-2-yl)-1H-indole **C2**.

A three-necked flask charged with Pd(OAc)<sub>2</sub> (5.0 mol %), 70% TBHP aqueous solution (200 mol %), 1-(pyridin-2-yl)-1H-indole **C2** (1 equiv.) and aldehydes (2 equiv.), toluene was added under Ar atmosphere. The reaction mixture was then allowed to stir at 100 °C for 11 h. The corresponding reaction mixture was filtered through a pad of celite, washed with dichloromethane and concentrated under reduced pressure. The residue was purified by flash chromatography on silica gel to afford the intermediates **C3**.

The starting substrates **1za-1zb** were synthesized according to the following procedures:<sup>[8]</sup> 2-(aminooxy)-2-methylpropanoic acid hydrochloride (1.2 equiv.) and NaOAc (2.4 equiv.) were added to a stirred solution of the corresponding ketone (1.0 equiv.) in EtOH (0.2 M). The mixture was then heated to reflux until complete by TLC analysis (4 – 6 hours). The reaction was cooled to room temperature, quenched with H<sub>2</sub>O and extracted with ethyl acetate. The combined organic extracts were then washed with H<sub>2</sub>O and brine, then dried over MgSO<sub>4</sub>. After the removal of the solvent, the residue was purified by flash column chromatography on silica gel to give products **1za-1zb**.

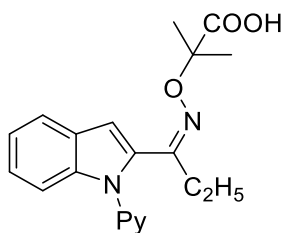

**(E)-2-methyl-2-(((1-(1-(pyridin-2-yl)-1H-indol-2-yl)propylidene)amino)oxy)propanoic acid (1za):** Yield = 72% (**C3-1za**); yellow solid; Only one set of peaks was observed in the <sup>1</sup>H and <sup>13</sup>C NMR: <sup>1</sup>H NMR (400 MHz, CDCl<sub>3</sub>) δ 9.53 (br s, 1H), 8.60 (d, *J* = 4.2 Hz, 1H), 7.80 – 7.77 (m, 1H), 7.65 (d, *J* = 7.6 Hz, 1H), 7.29 – 7.12 (m, 5H), 6.98 (s, 1H), 2.77 (q, *J* = 7.5 Hz, 2H), 1.29 – 1.23 (m, 9H); <sup>13</sup>C NMR (101 MHz, CDCl<sub>3</sub>) δ 177.6, 155.0, 152.5, 149.3, 139.9, 138.5, 133.9, 127.5, 124.3, 122.6, 122.3, 121.2, 121.1, 110.9, 108.1, 81.3, 24.0, 21.6, 11.5.

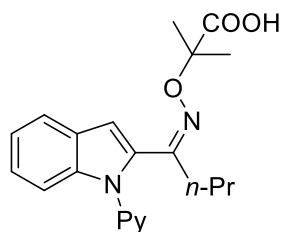

**(E)-2-methyl-2-(((1-(1-(pyridin-2-yl)-1H-indol-2-yl)butylidene)amino)oxy)propanoic acid (1zb):** Yield = 64% (**C3-1zb**); yellow solid. Only one set of peaks was observed in the  $^1\text{H}$  and  $^{13}\text{C}$  NMR:  $^1\text{H}$  NMR (500 MHz,  $\text{CDCl}_3$ )  $\delta$  9.67 (br s, 1H), 8.55 (d,  $J$  = 4.8 Hz, 1H), 7.74 (td,  $J$  = 7.7, 1.9 Hz, 1H), 7.61 (d,  $J$  = 7.6 Hz, 1H), 7.25 – 7.07 (m, 5H), 6.93 (s, 1H), 2.70 (t,  $J$  = 5.0 Hz, 2H), 1.72 – 1.65 (m, 2H), 1.19 (s, 6H), 1.00 (t,  $J$  = 7.4 Hz, 3H);  $^{13}\text{C}$  NMR (126 MHz,  $\text{CDCl}_3$ )  $\delta$  177.8, 153.6, 152.6, 149.2, 139.9, 138.5, 134.3, 127.5, 124.3, 122.6, 122.4, 121.14, 121.10, 110.9, 108.1, 81.2, 29.9, 24.0, 20.5, 14.4.

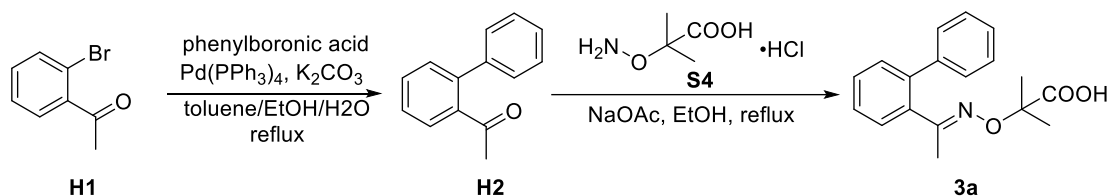

The intermediate **H2** was prepared according to the reported method<sup>[16]</sup>: o-Bromobenzaldehyde (5.0 mmol, 1.0 equiv), arylboronic acid (6.0 mmol, 1.2 equiv),  $\text{Pd}(\text{PPh}_3)_4$  (3 mol %) and  $\text{K}_2\text{CO}_3$  (10 mmol, 2.0 equiv) were dissolved in a mixture of toluene/EtOH/ $\text{H}_2\text{O}$  (4:4:1, 27 mL). The resulting mixture was deoxygenated with a stream of argon for 10 min, then heated to reflux until complete consumption of the starting aldehyde (monitored by GS-MS). The reaction was cooled down to room temperature and quenched with saturated  $\text{NH}_4\text{Cl}$  (10 mL). The reaction mixture was extracted with ethyl acetate (3 x 15 mL). The combined organic solution was washed with  $\text{H}_2\text{O}$ , saturated NaCl, dried over anhydrous  $\text{Na}_2\text{SO}_4$ , filtered and evaporated under reduced pressure. The residue was purified by silica gel column chromatography to give the intermediates **H2**.

The starting substrate **3a** was synthesized according to the following procedure:<sup>[8]</sup> 2-(aminooxy)-2-methylpropanoic acid hydrochloride (1.2 equiv.) and NaOAc (2.4 equiv.) were added to a stirred solution of the ketone **H2** (1.0 equiv.) in EtOH (0.2 M). The mixture was then heated to reflux until complete by TLC analysis (4 – 6 hours). The reaction was cooled to room temperature, quenched with  $\text{H}_2\text{O}$  and extracted with ethyl acetate. The combined organic extracts were then washed with  $\text{H}_2\text{O}$  and brine, then dried over  $\text{MgSO}_4$ . After the removal of the solvent. The residue was purified by flash column chromatography on silica gel to give product **3a**.

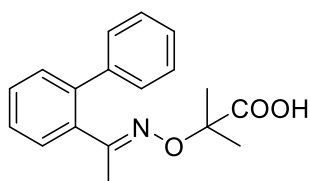

**2-(((1-([1,1'-biphenyl]-2-yl)ethylidene)amino)oxy)-2-methylpropanoic acid (3a):** Yield = 79% (**H2-3a**); White solid. E:Z = 5:1. Data of the mixture of *E*- and *Z*-isomers: <sup>1</sup>H NMR (400 MHz, CDCl<sub>3</sub>) δ 7.50 – 7.29 (m, 9H), 1.94 (s, 0.5H, *Z*-isomer), 1.80 (s, 2.5H, *E*-isomer), 1.52 (s, 5H, *E*-isomer), 1.33 (s, 1H, *Z*-isomer); <sup>13</sup>C NMR (101 MHz, CDCl<sub>3</sub>) δ 178.9, 160.1, 157.3, 140.9, 140.7, 140.6, 139.5, 136.5, 134.4, 130.3, 129.7, 129.3, 129.1, 129.0, 128.7, 128.49, 128.46, 128.4, 127.8, 127.6, 127.37, 127.36, 127.1, 81.2, 77.4, 77.1, 76.8, 24.3, 23.9, 22.0, 16.9.

#### 4. General Procedure and Characterization of the Electrolysis Products

Into a round bottom flask, *n*Bu<sub>4</sub>NBr (0.175 mmol), the substrate (0.25 mmol) and HFIP/TFE (4.0 mL/1.0 mL) with *n*Bu<sub>4</sub>NBF<sub>4</sub> (0.2 M) as an electrolyte was added. And then Cs<sub>2</sub>CO<sub>3</sub> (0.125 mmol) was added to the reaction mixture. The flask was equipped with a reticulated vitreous carbon anode (100 PPI, 1.0 cm x 1.0 cm x 0.5 cm) and a platinum plate (1 cm x 1.5 cm) cathode. The constant current (3 mA) electrolysis was carried out at room temperature until complete consumption of the substrate (monitored by TLC). Water (10 mL) was added to the reaction solution and HFIP/TFE was then removed under reduced pressure. The resulting suspension was extracted with ethyl acetate (3 x 10 mL). The combined organic solution was dried over anhydrous Na<sub>2</sub>SO<sub>4</sub>, filtered, and concentrated under reduced pressure. The residue was chromatographed through silica gel eluting with ethyl acetate/petroleum ether to give the desired product.

The gram scale electrolysis of compound **1a** (1.55 g, 3.06 mmol) was conducted in a 100 mL beaker-type cell for 50 h using a RVC plate (100PPI, 4.0 cm x 2.0 cm x 0.5 cm) as anode, a Pt plate cathode (3.0 cm x 2.0 cm) and a constant current of 3 mA. The RVC was fixed on a sharpened graphite rod (φ = 5 mm). Into the beaker-type cell, *n*Bu<sub>4</sub>NBr (2.14 mmol), the substrate **1a** (3.06 mmol) and HFIP/TFE (40 mL/10 mL) with *n*Bu<sub>4</sub>NBF<sub>4</sub> (0.2 M) as an electrolyte was added. And then Cs<sub>2</sub>CO<sub>3</sub> (1.53 mmol) was added to the reaction mixture. The constant current (3 mA) electrolysis was carried out at room temperature for 50 h. Water (50 mL) was added to the reaction solution and HFIP/TFE was then removed under reduced pressure. The resulting suspension was extracted with ethyl acetate (3 x 50 mL). The combined organic solution was dried over anhydrous Na<sub>2</sub>SO<sub>4</sub>, filtered, and concentrated under reduced pressure. The residue was chromatographed through silica gel eluting with ethyl acetate/petroleum ether to give the desired product (73% yield).

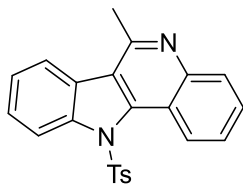

**6-methyl-11-tosyl-11H-indolo[3,2-c]quinoline (2a):** The crude product was purified by column chromatography on silica gel to give **2a** as yellow solid (79.3 mg, 82%); **M.P.:** 141–142 °C; <sup>1</sup>H NMR (400 MHz, CDCl<sub>3</sub>) δ 8.98 (d, *J* = 8.5 Hz, 1H), 8.40 (d, *J* = 8.2 Hz, 1H), 8.13 (d, *J* = 8.4 Hz, 1H), 7.91 (d, *J* = 7.8 Hz, 1H), 7.75 – 7.71 (m, 1H), 7.64 – 7.61 (m, 1H), 7.52 – 7.48 (m, 1H), 7.44 – 7.40 (m Hz, 1H), 6.96 (d, *J* = 8.2 Hz, 2H), 6.80 (d, *J* = 8.1 Hz, 2H), 3.01 (s, 3H), 2.15 (s, 3H); <sup>13</sup>C NMR (101 MHz, CDCl<sub>3</sub>) δ 153.7, 147.5, 145.0, 142.8, 141.2, 132.5, 129.2, 129.1, 128.8, 127.7, 127.0, 126.82, 126.76, 125.9, 125.7, 121.8, 121.5, 119.6, 119.2, 25.0, 21.5; HRMS (*m/z*) calcd. for

C<sub>23</sub>H<sub>19</sub>N<sub>2</sub>O<sub>2</sub>S [M+H]<sup>+</sup>: 387.1162; found: 387.1170. IR (KBr, cm<sup>-1</sup>):  $\nu$  = 3059, 2923, 2856, 1562, 1504, 1439, 1373, 1181.

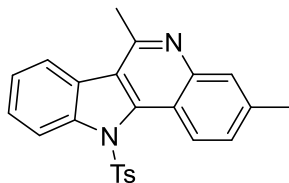

**3,6-dimethyl-11-tosyl-11H-indolo[3,2-c]quinoline (2b):** The crude product was purified by column chromatography on silica gel to give **2b** as yellow solid (90.1 mg, 90%); **M.P.:** 195-196 °C; <sup>1</sup>H NMR (400 MHz, CDCl<sub>3</sub>)  $\delta$  8.84 (d,  $J$  = 8.7 Hz, 1H), 8.36 (d,  $J$  = 8.2 Hz, 1H), 7.90 (s, 1H), 7.85 (d,  $J$  = 7.8 Hz, 1H), 7.47 – 7.43 (m, 2H), 7.39 – 7.36 (m, 1H), 6.95 (d,  $J$  = 8.2 Hz, 2H), 6.78 (d,  $J$  = 8.1 Hz, 2H), 2.96 (s, 3H), 2.58 (s, 3H), 2.12 (s, 3H); <sup>13</sup>C NMR (101 MHz, CDCl<sub>3</sub>)  $\delta$  153.5, 147.7, 144.8, 142.7, 140.9, 139.4, 132.5, 128.9, 127.9, 127.7, 126.64, 126.62, 126.4, 125.7, 121.6, 120.7, 118.9, 117.3, 24.9, 21.7, 21.4; HRMS ( $m/z$ ) calcd. for C<sub>24</sub>H<sub>21</sub>N<sub>2</sub>O<sub>2</sub>S [M+H]<sup>+</sup>: 401.1318; found: 401.1325; IR (KBr, cm<sup>-1</sup>):  $\nu$  = 3037, 2921, 2857, 1627, 1505, 1445, 1373, 1180.

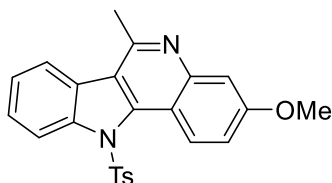

**3-methoxy-6-methyl-11-tosyl-11H-indolo[3,2-c]quinoline (2c):** The crude product was purified by column chromatography on silica gel to give **2c** as yellow solid (66.8mg, 64%); **M.P.:** 209-210 °C; <sup>1</sup>H NMR (500 MHz, CDCl<sub>3</sub>)  $\delta$  8.89 (d,  $J$  = 9.4 Hz, 1H), 8.39 (d,  $J$  = 8.3 Hz, 1H), 7.89 (d,  $J$  = 7.7 Hz, 1H), 7.49 – 7.47 (m, 2H), 7.43 – 7.40 (m, 1H), 7.29 (dd,  $J$  = 9.4, 2.7 Hz, 1H), 6.97 (d,  $J$  = 8.4 Hz, 2H), 6.82 (d,  $J$  = 8.2 Hz, 2H), 3.99 (s, 3H), 2.99 (s, 3H), 2.17 (s, 3H); <sup>13</sup>C NMR (126 MHz, CDCl<sub>3</sub>)  $\delta$  160.5, 154.1, 149.6, 144.9, 143.3, 141.0, 132.6, 129.1, 128.1, 128.0, 126.9, 126.6, 125.9, 121.6, 119.9, 119.2, 118.3, 114.3, 107.5, 55.7, 25.0, 21.6; HRMS ( $m/z$ ) calcd. for C<sub>24</sub>H<sub>21</sub>N<sub>2</sub>O<sub>3</sub>S [M+H]<sup>+</sup>: 417.1267; found: 417.1282; IR (KBr, cm<sup>-1</sup>):  $\nu$  = 3057, 2931, 2837, 1620, 1561, 1452, 1364, 1179.

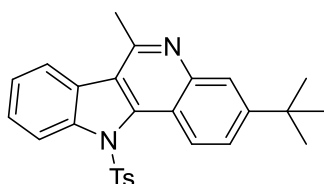

**3-(tert-butyl)-6-methyl-11-tosyl-11H-indolo[3,2-c]quinoline (2d):** The crude product was purified by column chromatography on silica gel to give **2d** as colorless oil (71.7 mg, 65%); <sup>1</sup>H NMR (500 MHz, CDCl<sub>3</sub>)  $\delta$  8.89 (d,  $J$  = 9.0 Hz, 1H), 8.39 (d,  $J$  = 8.3 Hz, 1H), 8.11 (s, 1H), 7.90 (d,  $J$  = 7.8 Hz, 1H), 7.72 (d,  $J$  = 7.1 Hz, 1H), 7.50 – 7.47 (m, 1H), 7.42 – 7.39 (m, 1H), 7.01 (d,  $J$  = 8.4 Hz, 2H), 6.83 (d,  $J$  = 8.2 Hz, 2H), 3.01 (s, 3H), 2.16 (s, 3H), 1.47 (s, 9H); <sup>13</sup>C NMR (126 MHz, CDCl<sub>3</sub>)  $\delta$  153.5, 152.5, 147.8, 144.9, 142.8, 141.0, 132.7, 129.1, 127.8, 126.79, 126.76, 126.4, 125.8, 124.6, 124.3, 121.7, 120.9, 119.0, 117.4, 35.2, 31.3, 25.0, 21.6; HRMS ( $m/z$ ) calcd. for C<sub>27</sub>H<sub>27</sub>N<sub>2</sub>O<sub>2</sub>S [M+H]<sup>+</sup>: 443.1788; found: 443.1797; IR (KBr, cm<sup>-1</sup>):  $\nu$  = 3055, 2961, 2869, 1620, 1552,

1447, 1373, 1182.

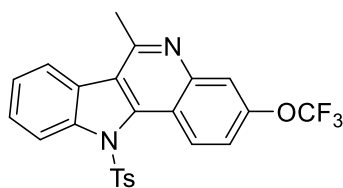

**6-methyl-11-tosyl-3-(trifluoromethoxy)-11H-indolo[3,2-c]quinoline (2e):** The crude product was purified by column chromatography on silica gel to give **2e** as white solid (89.2 mg, 76%); **M.P.:** 169-171 °C;  $^1\text{H}$  NMR (500 MHz,  $\text{CDCl}_3$ )  $\delta$  9.04 (d,  $J$  = 9.4 Hz, 1H), 8.42 (d,  $J$  = 8.4 Hz, 1H), 7.98 (s, 1H), 7.94 (d,  $J$  = 7.8 Hz, 1H), 7.56 – 7.52 (m, 1H), 7.50 – 7.44 (m, 2H), 6.98 (d,  $J$  = 8.3 Hz, 2H), 6.85 (d,  $J$  = 8.2 Hz, 2H), 3.03 (s, 3H), 2.18 (s, 3H);  $^{19}\text{F}$  NMR (471 MHz,  $\text{CDCl}_3$ )  $\delta$  -57.5;  $^{13}\text{C}$  NMR (101 MHz,  $\text{CDCl}_3$ )  $\delta$  155.2, 149.3 (q,  $J$  = 2.0 Hz), 148.0, 145.1, 142.5, 141.1, 132.4, 129.1, 128.8, 127.3, 127.2, 126.7, 126.0, 120.6 (q,  $J$  = 259.2 Hz), 121.8, 121.6, 119.2, 119.0, 118.6, 117.8, 25.0, 21.5; HRMS ( $m/z$ ) calcd. for  $\text{C}_{24}\text{H}_{18}\text{F}_3\text{N}_2\text{O}_3\text{S}$   $[\text{M}+\text{H}]^+$ : 471.0985; found: 471.0995; IR (KBr,  $\text{cm}^{-1}$ ):  $\nu$  = 3053, 2926, 2857, 1624, 1562, 1448, 1376, 1259, 1177.

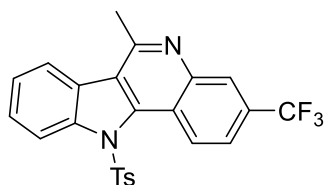

**6-methyl-11-tosyl-3-(trifluoromethyl)-11H-indolo[3,2-c]quinoline (2f):** The crude product was purified by column chromatography on silica gel to give **2f** as colorless oil (49.4 mg, 43%);  $^1\text{H}$  NMR (400 MHz,  $\text{CDCl}_3$ )  $\delta$  9.11 (d,  $J$  = 9.0 Hz, 1H), 8.44 (d,  $J$  = 7.6 Hz, 2H), 7.97 (d,  $J$  = 7.8 Hz, 1H), 7.80 (d,  $J$  = 8.9 Hz, 1H), 7.59 – 7.55 (m, 1H), 7.49 – 7.46 (m, 1H), 6.99 (d,  $J$  = 8.1 Hz, 2H), 6.85 (d,  $J$  = 8.0 Hz, 2H), 3.05 (s, 3H), 2.18 (s, 3H);  $^{19}\text{F}$  NMR (471 MHz,  $\text{CDCl}_3$ )  $\delta$  -62.6;  $^{13}\text{C}$  NMR (101 MHz,  $\text{CDCl}_3$ )  $\delta$  155.4, 146.5, 145.4, 142.2, 141.4, 132.5, 130.8, 130.5, 129.3, 128.1, 127.8, 127.2, 126.8, 126.7 (q,  $J_{\text{C-F}}$  = 4.0 Hz), 126.2, 124.2 (q,  $J_{\text{C-F}}$  = 272.7 Hz), 122.9, 122.2, 121.3 (q,  $J_{\text{C-F}}$  = 6.1 Hz), 119.1, 25.1, 21.6; HRMS ( $m/z$ ) calcd. for  $\text{C}_{24}\text{H}_{18}\text{F}_3\text{N}_2\text{O}_2\text{S}$   $[\text{M}+\text{H}]^+$ : 455.1036; found: 455.1054; IR (KBr,  $\text{cm}^{-1}$ ):  $\nu$  = 3058, 2928, 2862, 1590, 1508, 1447, 1334, 1177.

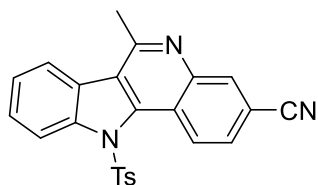

**6-methyl-11-tosyl-11H-indolo[3,2-c]quinoline-3-carbonitrile (2g):** The crude product was purified by column chromatography on silica gel to give **2g** as yellow solid (63.3 mg, 62%); **M.P.:** 224-225 °C;  $^1\text{H}$  NMR (500 MHz,  $\text{CDCl}_3$ )  $\delta$  9.09 (d,  $J$  = 8.8 Hz, 1H), 8.48 (s, 1H), 8.44 (d,  $J$  = 8.4 Hz, 1H), 7.99 (d,  $J$  = 7.9 Hz, 1H), 7.77 (d,  $J$  = 7.4 Hz, 1H), 7.61 – 7.58 (m, 1H), 7.51 – 7.48 (m, 1H), 6.98 (d,  $J$  = 8.4 Hz, 2H), 6.86 (d,  $J$  = 8.3 Hz, 2H), 3.06 (s, 3H), 2.19 (s, 3H);  $^{13}\text{C}$  NMR (126 MHz,  $\text{CDCl}_3$ )  $\delta$  156.0, 146.2, 145.5,

141.9, 141.6, 134.6, 132.4, 129.3, 128.4, 128.1, 126.9, 126.8, 126.4, 126.3, 123.4, 122.3, 121.9, 119.1, 118.8, 112.2, 25.2, 21.6; HRMS (m/z) calcd. for C<sub>24</sub>H<sub>18</sub>N<sub>3</sub>O<sub>2</sub>S [M+H]<sup>+</sup>: 412.1114; found: 412.1117; IR (KBr, cm<sup>-1</sup>):  $\nu$  = 3053, 2925, 2856, 1547, 1498, 1445, 1371, 1179.

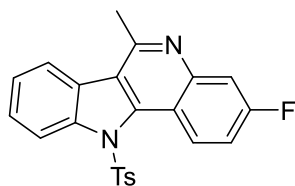

**3-fluoro-6-methyl-11-tosyl-11H-indolo[3,2-c]quinoline (2h):** The crude product was purified by column chromatography on silica gel to give **2h** as colorless oil (70.8 mg, 70%); <sup>1</sup>H NMR (400 MHz, CDCl<sub>3</sub>)  $\delta$  9.00 – 8.96 (m, 1H), 8.38 (d,  $J$  = 8.2 Hz, 1H), 7.89 (d,  $J$  = 7.8 Hz, 1H), 7.74 (dd,  $J$  = 10.1, 2.5 Hz, 1H), 7.52 – 7.48 (m, 1H), 7.44 – 7.37 (m, 2H), 6.94 (d,  $J$  = 8.2 Hz, 2H), 6.81 (d,  $J$  = 8.1 Hz, 2H), 2.98 (s, 3H), 2.16 (s, 3H); <sup>19</sup>F NMR (471 MHz, CDCl<sub>3</sub>)  $\delta$  -110.4; <sup>13</sup>C NMR (101 MHz, CDCl<sub>3</sub>)  $\delta$  162.8 (d,  $J_{C-F}$  = 251.5 Hz), 155.1, 148.8 (d,  $J_{C-F}$  = 12.1 Hz), 145.2, 142.9, 141.0, 132.4, 129.2, 129.1, 127.6, 127.1, 126.8, 126.0, 121.8, 121.0 (d,  $J_{C-F}$  = 2.0 Hz), 119.1, 116.5, 115.8 (d,  $J_{C-F}$  = 24.2 Hz), 112.7 (d,  $J_{C-F}$  = 20.2 Hz), 25.0, 21.6; HRMS (m/z) calcd. for C<sub>23</sub>H<sub>18</sub>FN<sub>2</sub>O<sub>2</sub>S [M+H]<sup>+</sup>: 405.1068; found: 405.1083; IR (KBr, cm<sup>-1</sup>):  $\nu$  = 3057, 2960, 2860, 1626, 1566, 1446, 1374, 1180.

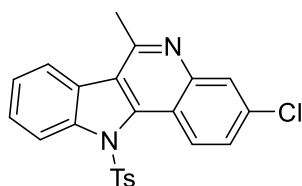

**3-chloro-6-methyl-11-tosyl-11H-indolo[3,2-c]quinoline (2i):** The crude product was purified by column chromatography on silica gel to give **2i** as colorless oil (66.2 mg, 63%); <sup>1</sup>H NMR (400 MHz, CDCl<sub>3</sub>)  $\delta$  8.93 (d,  $J$  = 9.2 Hz, 1H), 8.40 (d,  $J$  = 8.2 Hz, 1H), 8.12 (s, 1H), 7.92 (d,  $J$  = 7.8 Hz, 1H), 7.58 – 7.51 (m, 2H), 7.46 – 7.42 (m, 1H), 6.96 (d,  $J$  = 8.2 Hz, 2H), 6.83 (d,  $J$  = 8.1 Hz, 2H), 3.00 (s, 3H), 2.17 (s, 3H); <sup>13</sup>C NMR (101 MHz, CDCl<sub>3</sub>)  $\delta$  155.0, 148.0, 145.2, 142.6, 141.2, 135.1, 132.5, 129.2, 128.2, 127.9, 127.4, 127.3, 126.8, 126.6, 126.1, 121.9, 121.6, 119.1, 118.0, 25.1, 21.6; HRMS (m/z) calcd. for C<sub>23</sub>H<sub>18</sub>ClN<sub>2</sub>O<sub>2</sub>S [M+H]<sup>+</sup>: 421.0772; found: 421.0782; IR (KBr, cm<sup>-1</sup>):  $\nu$  = 3058, 2926, 2856, 1601, 1551, 1447, 1374, 1180.

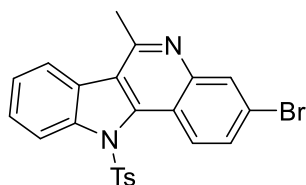

**3-bromo-6-methyl-11-tosyl-11H-indolo[3,2-c]quinoline (2j):** The crude product was purified by column chromatography on silica gel to give **2j** as colorless oil (63.2 mg, 54%); <sup>1</sup>H NMR (400 MHz, CDCl<sub>3</sub>)  $\delta$  8.85 (d,  $J$  = 9.1 Hz, 1H), 8.40 (d,  $J$  = 8.3 Hz, 1H), 8.30 (s, 1H), 7.92 (d,  $J$  = 7.8 Hz, 1H), 7.70 (d,  $J$  = 9.1 Hz, 1H), 7.55 – 7.51 (m, 1H), 7.46 – 7.42 (m, 1H), 6.96 (d,  $J$  = 8.0 Hz, 2H), 6.83 (d,  $J$  = 8.0 Hz, 2H), 3.00 (s, 3H), 2.17 (s, 3H); <sup>13</sup>C NMR (101 MHz, CDCl<sub>3</sub>)  $\delta$  155.0, 148.1, 145.2, 142.6, 141.2, 132.4,

131.2, 129.2, 129.1, 128.2, 127.4, 127.3, 126.8, 126.1, 123.4, 121.9, 121.7, 119.1, 118.2, 25.1, 21.6; HRMS ( $m/z$ ) calcd. for  $C_{23}H_{18}BrN_2O_2S$   $[M+H]^+$ : 465.0267; found: 465.0276; IR (KBr,  $cm^{-1}$ ):  $\nu$  = 3056, 2923, 2855, 1600, 1549, 1448, 1374, 1180.

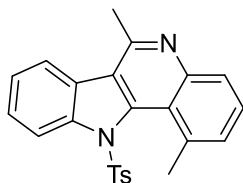

**1,6-dimethyl-11-tosyl-11H-indolo[3,2-c]quinoline (2k):** The crude product was purified by column chromatography on silica gel to give **2k** as yellow solid (53.4 mg, 53%); **M.P.**: 188-190 °C;  $^1H$  NMR (500 MHz,  $CDCl_3$ )  $\delta$  8.27 (d,  $J$  = 8.2 Hz, 1H), 8.00 (d,  $J$  = 8.3 Hz, 1H), 7.74 (d,  $J$  = 7.8 Hz, 1H), 7.69 – 7.66 (m, 1H), 7.48 – 7.45 (m, 2H), 7.38 – 7.35 (m, 1H), 6.69 (d,  $J$  = 8.2 Hz, 2H), 6.50 (d,  $J$  = 8.3 Hz, 2H), 3.16 (s, 3H), 2.91 (s, 3H), 2.14 (s, 3H);  $^{13}C$  NMR (126 MHz,  $CDCl_3$ )  $\delta$  152.7, 148.5, 144.7, 144.0, 141.8, 136.7, 130.2, 129.18, 129.16, 128.6, 128.3, 127.2, 126.9, 126.5, 126.0, 123.6, 121.9, 121.0, 120.0, 24.4, 22.5, 21.5; HRMS ( $m/z$ ) calcd. for  $C_{24}H_{21}N_2O_2S$   $[M+H]^+$ : 401.1318; found: 401.1327; IR (KBr,  $cm^{-1}$ ):  $\nu$  = 3059, 2926, 2857, 1564, 1501, 1439, 1370, 1175.

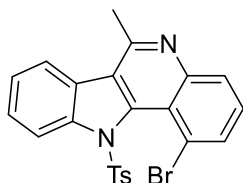

**1-bromo-6-methyl-11-tosyl-11H-indolo[3,2-c]quinoline (2l):** The crude product was purified by column chromatography on silica gel to give **2l** as yellow solid (42.5 mg, 37%); **M.P.**: 225-227 °C;  $^1H$  NMR (500 MHz,  $CDCl_3$ )  $\delta$  8.28 (d,  $J$  = 8.2 Hz, 1H), 8.13 (d,  $J$  = 8.4 Hz, 1H), 7.91 (d,  $J$  = 7.4 Hz, 1H), 7.79 (d,  $J$  = 7.8 Hz, 1H), 7.61 – 7.58 (m, 1H), 7.50 – 7.47 (m, 1H), 7.38 – 7.45 (m, 1H), 6.73 (d,  $J$  = 8.2 Hz, 2H), 6.59 (d,  $J$  = 8.2 Hz, 2H), 2.99 (s, 3H), 2.15 (s, 3H);  $^{13}C$  NMR (126 MHz,  $CDCl_3$ )  $\delta$  154.0, 148.5, 144.8, 142.7, 141.9, 132.1, 131.2, 129.4, 128.5, 128.1, 128.1, 127.4, 127.0, 126.3, 124.3, 122.1, 121.1, 119.8, 119.5, 24.5, 21.6; HRMS ( $m/z$ ) calcd. for  $C_{23}H_{18}BrN_2O_2S$   $[M+H]^+$ : 465.0267; found: 465.0270; IR (KBr,  $cm^{-1}$ ):  $\nu$  = 3060, 2926, 2860, 1541, 1496, 1437, 1374, 1172.

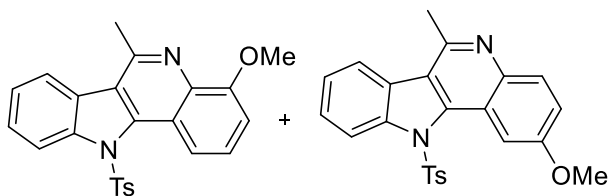

**4-methoxy-6-methyl-11-tosyl-11H-indolo[3,2-c]quinoline (2m) & 2-methoxy-6-methyl-11-tosyl-11H-indolo[3,2-c]quinoline (2m'):** The crude product was purified by column chromatography on silica gel to give **2m & 2m'** (1:1.1, 71.8 mg, 69%); **2m**: White solid; **M.P.**: 208-209 °C;  $^1H$  NMR (500 MHz,  $CDCl_3$ )  $\delta$  8.56 (d,  $J$  = 8.7 Hz, 1H), 8.42 (d,  $J$  = 8.3 Hz, 1H), 7.93 (d,  $J$  = 7.8 Hz, 1H), 7.58 – 7.55 (m, 1H), 7.54 – 7.51 (m, 1H), 7.46 – 7.43 (m, 1H), 7.14 (d,  $J$  = 7.6 Hz, 1H), 6.89 (d,  $J$  = 8.4 Hz, 2H), 6.77 (d,  $J$  = 8.2 Hz, 2H), 4.14 (s, 3H), 3.06 (s, 3H), 2.15 (s, 3H);  $^{13}C$  NMR (126 MHz,  $CDCl_3$ )

$\delta$  154.6, 152.6, 144.8, 143.1, 141.5, 138.9, 132.1, 128.8, 127.9, 127.0, 126.7, 125.9, 125.6, 122.3, 121.9, 120.6, 119.5, 118.8, 107.6, 56.2, 25.3, 21.4; HRMS ( $m/z$ ) calcd. for  $C_{24}H_{21}N_2O_3S$   $[M+H]^+$ : 417.1267; found: 417.1271; IR (KBr,  $cm^{-1}$ ):  $\nu$  = 3058, 2927, 2842, 1568, 1507, 1475, 1371, 1179.

**2m'**: colorless oil;  $^1H$  NMR (500 MHz,  $CDCl_3$ )  $\delta$  8.43 (d,  $J$  = 8.3 Hz, 1H), 8.39 (d,  $J$  = 2.8 Hz, 1H), 8.03 (d,  $J$  = 9.1 Hz, 1H), 7.92 (d,  $J$  = 7.8 Hz, 1H), 7.54 – 7.51 (m, 1H), 7.46 – 7.43 (m, 1H), 7.39 (dd,  $J$  = 9.2, 2.8 Hz, 1H), 6.96 (d,  $J$  = 8.4 Hz, 2H), 6.81 (d,  $J$  = 8.3 Hz, 2H), 4.05 (s, 3H), 2.98 (s, 3H), 2.17 (s, 3H);  $^{13}C$  NMR (126 MHz,  $CDCl_3$ )  $\delta$  157.2, 150.8, 144.9, 143.4, 142.2, 141.3, 132.3, 130.1, 128.9, 128.0, 126.9, 126.7, 125.9, 121.9, 121.8, 121.5, 120.4, 119.3, 105.2, 55.8, 24.6, 21.5; HRMS ( $m/z$ ) calcd. for  $C_{24}H_{21}N_2O_3S$   $[M+H]^+$ : 417.1267; found: 417.1281; IR (KBr,  $cm^{-1}$ ):  $\nu$  = 3053, 2933, 2837, 1563, 1508, 1443, 1364, 1180.

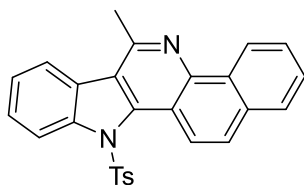

**8-methyl-13-tosyl-13H-benzo[h]indolo[3,2-c]quinoline (2n)**: The crude product was purified by column chromatography on silica gel to give **2n** as yellow solid (71.3 mg, 65%); **M.P.**: 190-192 °C;  $^1H$  NMR (400 MHz,  $CDCl_3$ )  $\delta$  9.41 (d,  $J$  = 8.2 Hz, 1H), 8.86 (d,  $J$  = 9.2 Hz, 1H), 8.41 (d,  $J$  = 8.2 Hz, 1H), 7.96 – 7.89 (m, 3H), 7.76 – 7.69 (m, 2H), 7.54 – 7.51 (m, 1H), 7.46 – 7.42 (m, 1H), 6.91 (d,  $J$  = 8.2 Hz, 2H), 6.77 (d,  $J$  = 8.1 Hz, 2H), 3.09 (s, 3H), 2.14 (s, 3H);  $^{13}C$  NMR (101 MHz,  $CDCl_3$ )  $\delta$  152.0, 145.3, 144.9, 143.6, 141.6, 133.4, 132.2, 131.3, 129.1, 129.1, 129.0, 128.2, 127.8, 127.1, 126.9, 126.2, 126.1, 125.2, 124.0, 122.5, 122.0, 119.5, 117.3, 25.0, 21.6; HRMS ( $m/z$ ) calcd. for  $C_{27}H_{21}N_2O_2S$   $[M+H]^+$ : 437.1318; found: 437.1322; IR (KBr,  $cm^{-1}$ ):  $\nu$  = 3054, 2925, 2857, 1563, 1508, 1444, 1372, 1180.

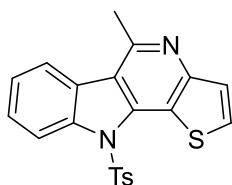

**5-methyl-10-tosyl-10H-thieno[2',3':5,6]pyrido[4,3-b]indole (2o)**: The crude product was purified by column chromatography on silica gel to give **2o** as yellow oil (63.6 mg, 65%);  $^1H$  NMR (500 MHz,  $CDCl_3$ )  $\delta$  8.51 (d,  $J$  = 8.4 Hz, 1H), 8.11 (d,  $J$  = 7.9 Hz, 1H), 7.80 (d,  $J$  = 5.7 Hz, 1H), 7.68 – 7.65 (m, 3H), 7.57 – 7.54 (m, 1H), 7.50 – 7.47 (m, 1H), 7.07 (d,  $J$  = 8.2 Hz, 2H), 3.08 (s, 3H), 2.25 (s, 3H);  $^{13}C$  NMR (126 MHz,  $CDCl_3$ )  $\delta$  155.7, 151.5, 145.5, 139.8, 138.2, 134.7, 131.2, 130.0, 127.14, 127.07, 125.9, 125.5, 125.0, 122.2, 117.9, 117.0, 116.0, 24.9, 21.7; HRMS ( $m/z$ ) calcd. for  $C_{21}H_{17}N_2O_2S_2$   $[M+H]^+$ : 393.0726; found: 393.0735; IR (KBr,  $cm^{-1}$ ):  $\nu$  = 3052, 2924, 2856, 1541, 1503, 1448, 1366, 1180.

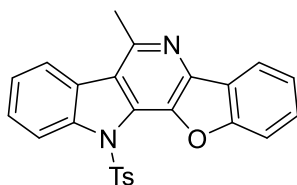

**6-methyl-11-tosyl-11H-benzofuro[2',3':5,6]pyrido[4,3-*b*]indole (2p):** The crude product was purified by column chromatography on silica gel to give **2p** as pale-yellow solid (36.6 mg, 34%); **M.P.:** 241-243 °C;  $^1\text{H}$  NMR (500 MHz,  $\text{CDCl}_3$ )  $\delta$  8.58 (d,  $J=8.5$  Hz, 1H), 8.28 (d,  $J=7.7$  Hz, 1H), 8.15 (d,  $J=7.9$  Hz, 1H), 7.95 (d,  $J=8.4$  Hz, 2H), 7.79 (d,  $J=8.3$  Hz, 1H), 7.62 - 7.58 (m, 2H), 7.51 - 7.44 (m, 2H), 7.14 (d,  $J=8.2$  Hz, 2H), 3.13 (s, 3H), 2.26 (s, 3H);  $^{13}\text{C}$  NMR (126 MHz,  $\text{CDCl}_3$ )  $\delta$  157.0, 149.7, 145.5, 141.8, 138.8, 135.6, 135.5, 130.0, 128.7, 128.1, 127.6, 127.4, 125.5, 124.7, 123.79, 123.75, 122.4, 121.0, 119.8, 115.3, 112.4, 24.7, 21.7; HRMS ( $m/z$ ) calcd. for  $\text{C}_{25}\text{H}_{19}\text{N}_2\text{O}_3\text{S}$   $[\text{M}+\text{H}]^+$ : 427.1111; found: 427.1121; IR (KBr,  $\text{cm}^{-1}$ ):  $\nu$  = 3059, 2949, 1553, 1446, 1379, 1180.

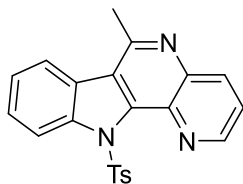

**6-methyl-11-tosyl-11H-indolo[3,2-*c*][1,5]naphthyridine (2q):** The crude product was purified by column chromatography on silica gel to give **2q** as white solid (54.5 mg, 56%); **M.P.:** 220-221 °C;  $^1\text{H}$  NMR (500 MHz,  $\text{CDCl}_3$ )  $\delta$  8.74 (d,  $J=2.8$  Hz, 1H), 8.72 (d,  $J=8.6$  Hz, 1H), 8.35 (d,  $J=8.5$  Hz, 1H), 8.26 (d,  $J=7.9$  Hz, 1H), 8.16 (d,  $J=8.3$  Hz, 2H), 7.68 – 7.65 (m, 1H), 7.58 – 7.53 (m, 2H), 7.30 (d,  $J=8.2$  Hz, 2H), 3.21 (s, 3H), 2.40 (s, 3H);  $^{13}\text{C}$  NMR (126 MHz,  $\text{CDCl}_3$ )  $\delta$  155.5, 147.4, 144.5, 141.9, 141.0, 139.8, 138.6, 136.4, 133.7, 129.2, 128.0, 127.7, 124.5, 124.4, 123.5, 122.1, 120.6, 116.8, 25.5, 21.8; HRMS ( $m/z$ ) calcd. for  $\text{C}_{22}\text{H}_{18}\text{N}_3\text{O}_2\text{S}$   $[\text{M}+\text{H}]^+$ : 388.1114; found: 388.1129; IR (KBr,  $\text{cm}^{-1}$ ):  $\nu$  = 3055, 2924, 2855, 1590, 1498, 1441, 1362, 1178.

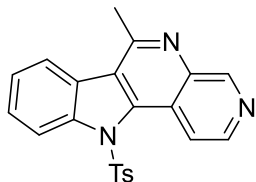

**6-methyl-11-tosyl-11H-indolo[3,2-*c*][1,7]naphthyridine (2r):** The crude product was purified by column chromatography on silica gel to give **2r** as white solid (46.8 mg, 48%); **M.P.:** 192-193 °C;  $^1\text{H}$  NMR (500 MHz,  $\text{CDCl}_3$ )  $\delta$  9.52 (s, 1H), 8.86 (d,  $J=6.0$  Hz, 1H), 8.68 (d,  $J=6.0$  Hz, 1H), 8.49 (d,  $J=8.4$  Hz, 1H), 8.06 (d,  $J=7.9$  Hz, 1H), 7.63 – 7.60 (m, 1H), 7.52 – 7.49 (m, 1H), 7.10 (d,  $J=8.3$  Hz, 2H), 6.89 (d,  $J=8.2$  Hz, 2H), 3.10 (s, 3H), 2.19 (s, 3H);  $^{13}\text{C}$  NMR (126 MHz,  $\text{CDCl}_3$ )  $\delta$  155.9, 153.5, 145.5, 143.5, 142.0, 141.4, 140.2, 133.1, 129.5, 128.2, 126.7, 126.4, 126.0, 123.9, 122.8, 122.5, 118.6, 118.5, 25.4, 21.6; HRMS ( $m/z$ ) calcd. for  $\text{C}_{22}\text{H}_{18}\text{N}_3\text{O}_2\text{S}$   $[\text{M}+\text{H}]^+$ : 388.1114; found: 388.1123; IR (KBr,  $\text{cm}^{-1}$ ):  $\nu$  = 3036, 2923, 2854, 1597, 1491, 1445, 1372, 1180.

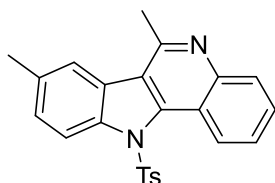

**6,8-dimethyl-11-tosyl-11H-indolo[3,2-*c*]quinoline (2s):** The crude product was purified by column chromatography on silica gel to give **2s** as white solid (71.9 mg,

72%); **M.P.**: 199-201 °C;  $^1\text{H}$  NMR (500 MHz,  $\text{CDCl}_3$ )  $\delta$  8.98 (d,  $J$  = 8.5 Hz, 1H), 8.27 (d,  $J$  = 8.5 Hz, 1H), 8.12 (d,  $J$  = 8.4 Hz, 1H), 7.74 – 7.71 (m, 1H), 7.69 (s, 1H), 7.64 – 7.60 (m, 1H), 7.31 (d,  $J$  = 8.5 Hz, 1H), 6.95 (d,  $J$  = 8.4 Hz, 2H), 6.80 (d,  $J$  = 8.3 Hz, 2H), 3.00 (s, 3H), 2.49 (s, 3H), 2.15 (s, 3H);  $^{13}\text{C}$  NMR (126 MHz,  $\text{CDCl}_3$ )  $\delta$  153.8, 147.4, 144.8, 143.0, 139.2, 135.7, 132.5, 129.1, 129.0, 128.8, 128.2, 127.9, 126.8, 125.7, 122.1, 121.5, 119.7, 118.8, 25.1, 21.8, 21.6; HRMS ( $m/z$ ) calcd. for  $\text{C}_{24}\text{H}_{21}\text{N}_2\text{O}_2\text{S}$   $[\text{M}+\text{H}]^+$ : 401.1318; found: 401.1330; IR (KBr,  $\text{cm}^{-1}$ ):  $\nu$  = 3060, 2922, 2859, 1559, 1505, 1444, 1371, 1178.

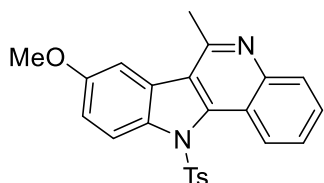

**8-methoxy-6-methyl-11-tosyl-11H-indolo[3,2-c]quinoline (2t)**: The crude product was purified by column chromatography on silica gel to give **2t** as yellow solid (78 mg, 75%); **M.P.**: 196-198 °C;  $^1\text{H}$  NMR (500 MHz,  $\text{CDCl}_3$ )  $\delta$  8.97 (d,  $J$  = 8.5 Hz, 1H), 8.30 – 8.28 (m, 1H), 8.11 (d,  $J$  = 8.4 Hz, 1H), 7.74 – 7.71 (m, 1H), 7.64 – 7.61 (m, 1H), 7.35 (s, 1H), 7.08 – 7.06 (m, 1H), 6.90 (d,  $J$  = 8.2 Hz, 2H), 6.79 (d,  $J$  = 8.0 Hz, 2H), 3.89 (s, 3H), 2.97 (s, 3H), 2.15 (s, 3H);  $^{13}\text{C}$  NMR (126 MHz,  $\text{CDCl}_3$ )  $\delta$  158.0, 153.5, 147.4, 144.8, 143.6, 135.2, 132.1, 129.1, 128.9, 128.7, 126.73, 126.72, 125.6, 121.6, 120.0, 119.7, 113.7, 106.1, 55.8, 24.8, 21.4; HRMS ( $m/z$ ) calcd. for Chemical Formula:  $\text{C}_{24}\text{H}_{21}\text{N}_2\text{O}_3\text{S}$   $[\text{M}+\text{H}]^+$ : 417.1267; found: 417.1266; IR (KBr,  $\text{cm}^{-1}$ ):  $\nu$  = 2994, 2950, 1477, 1372, 1324, 1180.

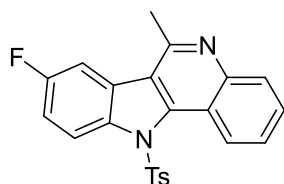

**8-fluoro-6-methyl-11-tosyl-11H-indolo[3,2-c]quinoline (2u)**: The crude product was purified by column chromatography on silica gel to give **2u** as white oil (69.7 mg, 67%);  $^1\text{H}$  NMR (500 MHz,  $\text{CDCl}_3$ )  $\delta$  8.98 (d,  $J$  = 8.5 Hz, 1H), 8.38 – 8.36 (m, 1H), 8.13 (d,  $J$  = 8.4 Hz, 1H), 7.77 – 7.74 (m, 1H), 7.66 – 7.63 (m, 1H), 7.57 (dd,  $J$  = 8.8, 2.4 Hz, 1H), 7.23 (td,  $J$  = 8.9, 2.5 Hz, 1H), 6.93 (d,  $J$  = 8.4 Hz, 2H), 6.83 (d,  $J$  = 8.4 Hz, 2H), 2.97 (s, 3H), 2.18 (s, 3H);  $^{19}\text{F}$  NMR (471 MHz,  $\text{CDCl}_3$ )  $\delta$  -115.5.  $^{13}\text{C}$  NMR (126 MHz,  $\text{CDCl}_3$ )  $\delta$  160.9 (d,  $J_{\text{C-F}}$  = 244.4 Hz), 153.4, 147.6, 145.1, 143.9, 137.2, 132.1, 129.5, 129.1, 129.0, 128.8, 126.8, 126.7, 125.8, 120.9 (d,  $J_{\text{C-F}}$  = 3.8 Hz), 120.4 (d,  $J_{\text{C-F}}$  = 8.8 Hz), 119.4, 114.3 (d,  $J_{\text{C-F}}$  = 23.9 Hz), 108.1 (d,  $J_{\text{C-F}}$  = 25.2 Hz), 24.7, 21.5; HRMS ( $m/z$ ) calcd. for Chemical Formula:  $\text{C}_{23}\text{H}_{18}\text{FN}_2\text{O}_2\text{S}$   $[\text{M}+\text{H}]^+$ : 405.1068; found: 405.1064; IR (KBr,  $\text{cm}^{-1}$ ):  $\nu$  = 2921, 2861, 1594, 1473, 1375, 1325, 1175.

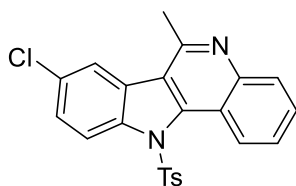

**8-chloro-6-methyl-11-tosyl-11H-indolo[3,2-c]quinoline (2v):** The crude product was purified by column chromatography on silica gel to give **2v** as white solid (66.4 mg, 63%); **M.P.:** 200-202 °C;  $^1\text{H}$  NMR (500 MHz,  $\text{CDCl}_3$ )  $\delta$  8.98 (d,  $J$  = 8.5, 1H), 8.34 (d,  $J$  = 8.9 Hz, 1H), 8.13 (d,  $J$  = 8.1 Hz, 1H), 7.88 (d,  $J$  = 2.0 Hz, 1H), 7.77 – 7.74 (m, 1H), 7.66 – 7.63 (m, 1H), 7.48 – 7.46 (m, 1H), 6.96 (d,  $J$  = 8.4 Hz, 2H), 6.85 (d,  $J$  = 8.2 Hz, 2H), 2.99 (s, 3H), 2.18 (s, 3H);  $^{13}\text{C}$  NMR (126 MHz,  $\text{CDCl}_3$ )  $\delta$  153.4, 147.7, 145.2, 143.4, 139.4, 132.3, 131.7, 129.5, 129.2, 128.92, 128.86, 126.9, 126.71, 126.65, 125.9, 121.6, 120.3, 120.0, 119.2, 24.9, 21.5; HRMS ( $m/z$ ) calcd. for Chemical Formula:  $\text{C}_{23}\text{H}_{18}\text{ClN}_2\text{O}_2\text{S}$   $[\text{M}+\text{H}]^+$ : 421.0772; found: 421.0769; IR (KBr,  $\text{cm}^{-1}$ ):  $\nu$  = 2989, 2925, 1503, 1436, 1375, 1314, 1182.

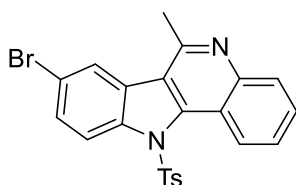

**8-bromo-6-methyl-11-tosyl-11H-indolo[3,2-c]quinoline (2w):** The crude product was purified by column chromatography on silica gel to give **2w** as yellow solid (67.8 mg, 58%); **M.P.:** 226-227 °C;  $^1\text{H}$  NMR (500 MHz,  $\text{CDCl}_3$ )  $\delta$  8.97 (d,  $J$  = 8.5 Hz, 1H), 8.28 (d,  $J$  = 8.8 Hz, 1H), 8.12 (d,  $J$  = 8.4 Hz, 1H), 8.03 (s, 1H), 7.77 – 7.73 (m, 1H), 7.65 – 7.59 (m, 2H), 6.96 (d,  $J$  = 8.2 Hz, 2H), 6.84 (d,  $J$  = 8.2 Hz, 2H), 2.98 (s, 3H), 2.18 (s, 3H);  $^{13}\text{C}$  NMR (126 MHz,  $\text{CDCl}_3$ )  $\delta$  153.4, 147.6, 145.2, 143.2, 139.8, 132.4, 129.7, 129.5, 129.3, 129.2, 128.9, 126.7, 126.6, 125.9, 124.5, 120.4, 120.1, 119.4, 119.2, 24.9, 21.5; HRMS ( $m/z$ ) calcd. for Chemical Formula:  $\text{C}_{23}\text{H}_{18}\text{BrN}_2\text{O}_2\text{S}$   $[\text{M}+\text{H}]^+$ : 465.0267; found: 465.0266; IR (KBr,  $\text{cm}^{-1}$ ):  $\nu$  = 3022, 2925, 1509, 1427, 1373, 1313, 1179.

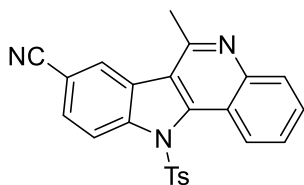

**6-methyl-11-tosyl-11H-indolo[3,2-c]quinoline-8-carbonitrile (2x):** The crude product was purified by column chromatography on silica gel to give **2x** as white solid (66.3 mg, 64%); **M.P.:** 203-205 °C;  $^1\text{H}$  NMR (500 MHz,  $\text{CDCl}_3$ )  $\delta$  8.98 (d,  $J$  = 8.5 Hz, 1H), 8.53 (d,  $J$  = 8.7 Hz, 1H), 8.27 (s, 1H), 8.16 (d,  $J$  = 8.4 Hz, 1H), 7.80 – 7.77 (m, 2H), 7.67 – 7.66 (m, 1H), 7.04 (d,  $J$  = 8.4 Hz, 2H), 6.90 (d,  $J$  = 8.2 Hz, 2H), 3.05 (s, 3H), 2.21 (s, 3H);  $^{13}\text{C}$  NMR (126 MHz,  $\text{CDCl}_3$ )  $\delta$  153.3, 147.9, 145.7, 143.5, 143.2,

132.6, 129.90, 129.88, 129.5, 129.1, 127.7, 126.6, 126.1, 126.0, 119.5, 119.2, 118.8, 118.7, 109.4, 24.9, 21.5; HRMS (m/z) calcd. for Chemical Formula: C<sub>24</sub>H<sub>18</sub>N<sub>3</sub>O<sub>2</sub>S [M+H]<sup>+</sup>: 412.1114; found: 412.1111; IR (KBr, cm<sup>-1</sup>):  $\nu$  = 2925, 1559, 1508, 1377, 1176.

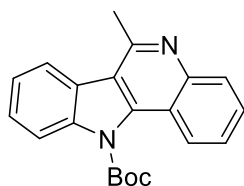

**tert-butyl 6-methyl-11H-indolo[3,2-c]quinoline-11-carboxylate (2ya):** The crude product was purified by column chromatography on silica gel to give **2ya** as yellow oil (48.8 mg, 59%); <sup>1</sup>H NMR (500 MHz, CDCl<sub>3</sub>)  $\delta$  8.30 (d,  $J$  = 8.4 Hz, 1H), 8.22 (d,  $J$  = 8.4 Hz, 1H), 8.17 (d,  $J$  = 8.4 Hz, 2H), 7.70 – 7.67 (m, 1H), 7.55 – 7.52 (m, 2H), 7.48 – 7.45 (m, 1H), 3.18 (s, 3H), 1.74 (s, 9H); <sup>13</sup>C NMR (126 MHz, CDCl<sub>3</sub>)  $\delta$  154.2, 151.2, 147.0, 140.3, 139.8, 129.5, 128.5, 126.8, 124.8, 124.74, 124.66, 123.9, 122.0, 118.1, 117.7, 114.9, 85.7, 28.2, 25.3; HRMS (m/z) calcd. for C<sub>21</sub>H<sub>21</sub>N<sub>2</sub>O<sub>2</sub> [M+H]<sup>+</sup>: 333.1598; found: 333.1603; IR (KBr, cm<sup>-1</sup>):  $\nu$  = 3059, 2980, 2930, 1740, 1565, 1442, 1360, 1293, 1147.

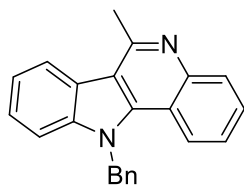

**11-benzyl-6-methyl-11H-indolo[3,2-c]quinoline (2yb):** The crude product was purified by column chromatography on silica gel to give **2yb** as yellow oil (34.8 mg, 43%); <sup>1</sup>H NMR (500 MHz, CDCl<sub>3</sub>)  $\delta$  8.32 (d,  $J$  = 7.9 Hz, 1H), 8.23 (d,  $J$  = 8.4 Hz, 1H), 8.18 (d,  $J$  = 8.4 Hz, 1H), 7.66 – 7.63 (m, 1H), 7.53 (d,  $J$  = 3.9 Hz, 2H), 7.48 – 7.45 (m, 1H), 7.42 – 7.38 (m, 1H), 7.34 – 7.28 (m, 3H), 7.19 (d,  $J$  = 7.2 Hz, 2H), 6.00 (s, 2H), 3.25 (s, 3H); <sup>13</sup>C NMR (126 MHz, CDCl<sub>3</sub>)  $\delta$  155.0, 146.4, 140.9, 140.1, 136.5, 129.7, 129.3, 128.0, 127.9, 126.0, 125.6, 125.2, 122.7, 122.2, 121.8, 121.7, 116.9, 114.5, 109.8, 49.5, 25.2; HRMS (m/z) calcd. for C<sub>23</sub>H<sub>19</sub>N<sub>2</sub> [M+H]<sup>+</sup>: 323.1543; found: 323.1554; IR (KBr, cm<sup>-1</sup>):  $\nu$  = 3059, 2922, 2851, 1559, 1507, 1443, 1237, 1164.

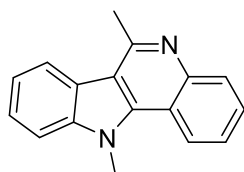

**6,11-dimethyl-11H-indolo[3,2-c]quinoline (2yc):** The crude product was purified by column chromatography on silica gel to give **2yc** as yellow oil (25.3 mg, 41%); <sup>1</sup>H NMR (400 MHz, CDCl<sub>3</sub>)  $\delta$  8.63 (d,  $J$  = 8.3 Hz, 1H), 8.28 (d,  $J$  = 8.1 Hz, 1H), 8.25 (d,  $J$  = 8.4 Hz, 1H), 7.74 – 7.70 (m, 1H), 7.64 – 7.56 (m, 3H), 7.46 – 7.42 (m, 1H), 4.42 (s, 3H), 3.22 (s, 3H); <sup>13</sup>C NMR (101 MHz, CDCl<sub>3</sub>)  $\delta$  154.7, 146.3, 140.2, 139.7, 129.6, 127.6, 124.9, 124.6, 122.1, 121.8, 121.7, 120.9, 117.2, 113.7, 109.1, 33.2, 24.9; HRMS (m/z) calcd. for C<sub>17</sub>H<sub>15</sub>N<sub>2</sub> [M+H]<sup>+</sup>: 247.1230; found: 247.1238; IR (KBr, cm<sup>-1</sup>):  $\nu$  = 3055, 2923, 1559, 1512, 1436, 1328, 1294.

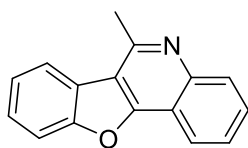

**6-methylbenzofuro[3,2-c]quinoline (2yd):** The crude product was purified by column chromatography on silica gel to give **2yd** as yellow solid (23.1 mg, 40%); **M.P.:** 132–134 °C;  $^1\text{H}$  NMR (500 MHz,  $\text{CDCl}_3$ )  $\delta$  8.35 (d,  $J = 8.1$  Hz, 1H), 8.17 (d,  $J = 8.5$  Hz, 1H), 8.07 – 8.05 (m, 1H), 7.75 – 7.73 (m, 2H), 7.63 – 7.60 (m, 1H), 7.54 – 7.51 (m, 1H), 7.48 – 7.45 (m, 1H), 3.13 (s, 3H);  $^{13}\text{C}$  NMR (126 MHz,  $\text{CDCl}_3$ )  $\delta$  157.4, 155.9, 154.8, 146.9, 129.4, 128.9, 126.8, 126.1, 124.0, 123.4, 121.8, 120.7, 116.2, 115.4, 112.1, 24.2; HRMS ( $m/z$ ) calcd. for  $\text{C}_{16}\text{H}_{12}\text{NO}$   $[\text{M}+\text{H}]^+$ : 234.0913; found: 234.0910; IR (KBr,  $\text{cm}^{-1}$ ):  $\nu = 2917, 1559, 1508, 1363, 1156$ .

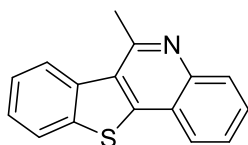

**6-methylbenzo[4,5]thieno[3,2-c]quinoline (2ye):** The crude product was purified by column chromatography on silica gel to give **2ye** as yellow oil (19.2 mg, 31%);  $^1\text{H}$  NMR (500 MHz,  $\text{CDCl}_3$ )  $\delta$  8.36 (d,  $J = 8.1$  Hz, 1H), 8.17 (d,  $J = 8.5$  Hz, 1H), 8.07 (d,  $J = 7.6$  Hz, 1H), 7.75 – 7.73 (m, 2H), 7.64 – 7.61 (m, 1H), 7.55 – 7.52 (m, 1H), 7.49 – 7.46 (m, 1H), 3.13 (s, 3H);  $^{13}\text{C}$  NMR (126 MHz,  $\text{CDCl}_3$ )  $\delta$  157.4, 155.9, 154.8, 146.9, 129.4, 128.9, 126.8, 126.1, 124.0, 123.5, 121.8, 120.7, 116.2, 115.4, 112.1, 24.2; HRMS ( $m/z$ ) calcd. for  $\text{C}_{16}\text{H}_{12}\text{NS}$   $[\text{M}+\text{H}]^+$ : 250.0685; found: 250.0680; IR (KBr,  $\text{cm}^{-1}$ ):  $\nu = 2919, 1560, 1509, 1363, 1155$ .

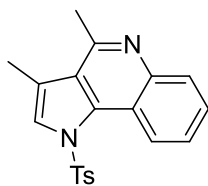

**3,4-dimethyl-1-tosyl-1H-pyrrolo[3,2-c]quinoline (2yf):** The crude product was purified by column chromatography on silica gel to give **2yf** as yellow oil (58.8 mg, 67%);  $^1\text{H}$  NMR (500 MHz,  $\text{CDCl}_3$ )  $\delta$  8.96 (d,  $J = 8.6$  Hz, 1H), 8.02 (d,  $J = 8.3$  Hz, 1H), 7.70 (s, 1H), 7.58 – 7.54 (m, 3H), 7.46 – 7.43 (m, 1H), 7.13 (d,  $J = 8.3$  Hz, 2H), 2.95 (s, 3H), 2.53 (s, 3H), 2.27 (s, 3H);  $^{13}\text{C}$  NMR (126 MHz,  $\text{CDCl}_3$ )  $\delta$  154.2, 145.6, 145.3, 135.9, 135.2, 130.0, 129.3, 127.6, 127.1, 126.8, 125.7, 124.2, 123.5, 117.7, 117.5, 24.5, 21.5, 13.4; HRMS ( $m/z$ ) calcd. for  $\text{C}_{20}\text{H}_{19}\text{N}_2\text{O}_2\text{S}$   $[\text{M}+\text{H}]^+$ : 351.1162; found: 351.1158; IR (KBr,  $\text{cm}^{-1}$ ):  $\nu = 2966, 2929, 1499, 1362, 1171$ .

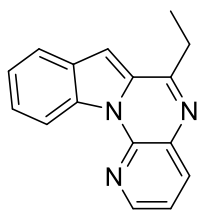

**6-ethylpyrido[3',2':5,6]pyrazino[1,2-*a*]indole (2za):** The crude product was purified by column chromatography on silica gel to give **2za** as yellow oil (23.5 mg, 38%);  $^1\text{H}$  NMR (500 MHz,  $\text{CDCl}_3$ )  $\delta$  9.38 (d,  $J$  = 8.6 Hz, 1H), 8.60 (d,  $J$  = 4.7 Hz, 1H), 8.19 (d,  $J$  = 7.8 Hz, 1H), 7.92 (d,  $J$  = 8.1 Hz, 1H), 7.59 – 7.56 (m, 1H), 7.48 – 7.45 (m, 1H), 7.37 (dd,  $J$  = 7.9, 4.8 Hz, 1H), 7.20 (s, 1H), 3.15 (q,  $J$  = 7.6 Hz, 2H), 1.51 (t,  $J$  = 7.6 Hz, 3H);  $^{13}\text{C}$  NMR (101 MHz,  $\text{CDCl}_3$ )  $\delta$  161.0, 146.6, 143.1, 136.2, 133.1, 130.6, 130.2, 128.7, 124.9, 123.6, 121.9, 120.0, 118.0, 100.9, 29.0, 12.2; HRMS ( $m/z$ ) calcd. for  $\text{C}_{16}\text{H}_{14}\text{N}_3$  [ $\text{M}+\text{H}$ ] $^+$ : 248.1182; found: 248.1186; IR (KBr,  $\text{cm}^{-1}$ ):  $\nu$  = 3054, 2928, 2862, 1528, 1456, 1413.

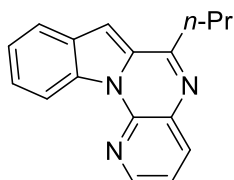

**6-propylpyrido[3',2':5,6]pyrazino[1,2-*a*]indole (2zb):** The crude product was purified by column chromatography on silica gel to give **2zb** as yellow oil (26.7 mg, 41%);  $^1\text{H}$  NMR (500 MHz,  $\text{CDCl}_3$ )  $\delta$  9.36 (d,  $J$  = 8.4 Hz, 1H), 8.58 (dd,  $J$  = 4.7, 1.6 Hz, 1H), 8.17 (dd,  $J$  = 7.8, 1.6 Hz, 1H), 7.91 (d,  $J$  = 8.0 Hz, 1H), 7.58 – 7.55 (m, 1H), 7.48 – 7.45 (m, 1H), 7.35 (dd,  $J$  = 7.9, 4.7 Hz, 1H), 7.18 (s, 1H), 3.08 (t,  $J$  = 7.8 Hz, 2H), 2.04 – 1.96 (m, 2H), 1.12 (t,  $J$  = 7.4 Hz, 3H);  $^{13}\text{C}$  NMR (126 MHz,  $\text{CDCl}_3$ )  $\delta$  160.1, 146.6, 143.1, 136.1, 133.1, 130.6, 130.5, 128.6, 124.9, 123.6, 121.9, 120.0, 118.0, 101.1, 37.9, 21.7, 14.4; HRMS ( $m/z$ ) calcd. for  $\text{C}_{17}\text{H}_{16}\text{N}_3$  [ $\text{M}+\text{H}$ ] $^+$ : 262.1339; found: 262.1344; IR (KBr,  $\text{cm}^{-1}$ ):  $\nu$  = 3051, 2958, 2877, 1576, 1528, 1457, 1410.

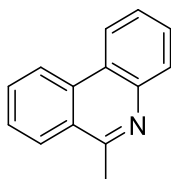

**6-methylphenanthridine (4a):** The crude product was purified by column chromatography on silica gel to give **4a** as white solid (41.6 mg, 86%);  $^1\text{H}$  NMR (400 MHz,  $\text{CDCl}_3$ )  $\delta$  8.61 (d,  $J$  = 8.3 Hz, 1H), 8.52 (d,  $J$  = 8.1 Hz, 1H), 8.20 (d,  $J$  = 8.2 Hz, 1H), 8.10 (d,  $J$  = 8.2 Hz, 1H), 7.84 – 7.80 (m, 1H), 7.73 – 7.66 (m, 2H), 7.63 – 7.59 (m, 1H), 3.04 (s, 3H);  $^{13}\text{C}$  NMR (101 MHz,  $\text{CDCl}_3$ )  $\delta$  159.0, 143.8, 132.7, 130.6, 129.5, 128.8, 127.4, 126.7, 126.4, 126.0, 123.9, 122.4, 122.1, 23.5.<sup>[17]</sup>

## 5. Cyclic Voltammetry Studies

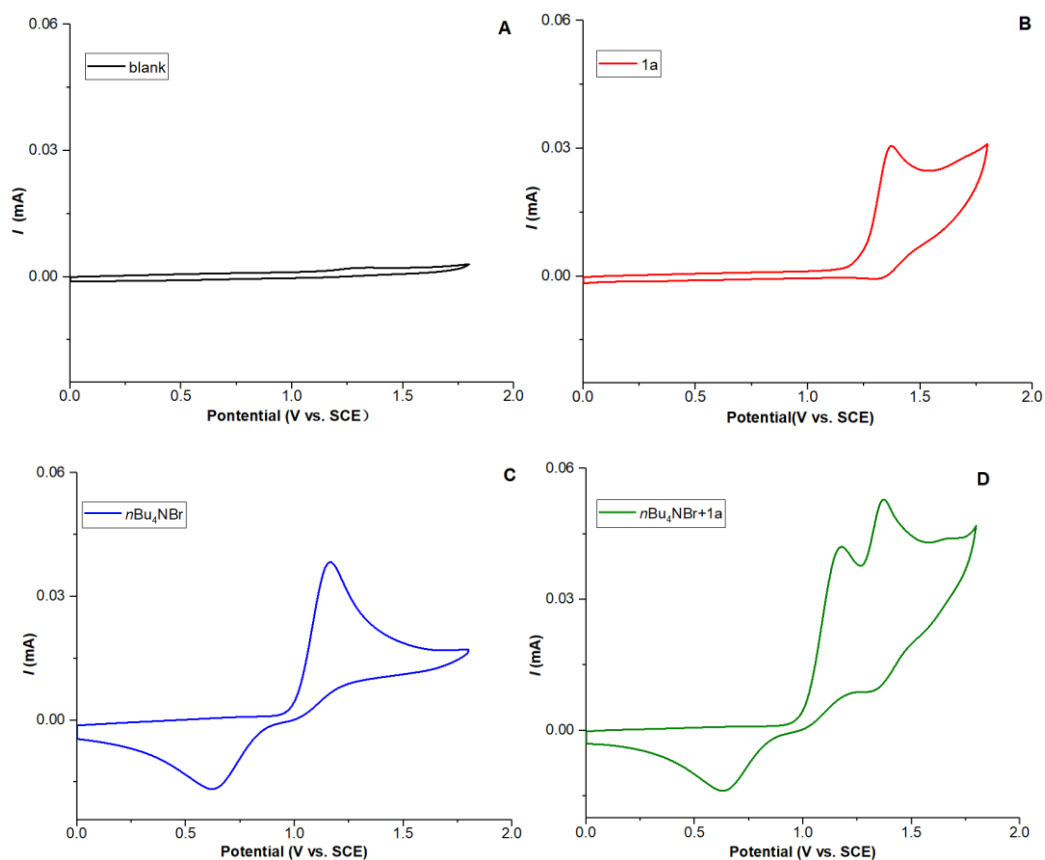

**Figure S1.** Cyclic voltammograms of 0.2 M  $n\text{Bu}_4\text{NBF}_4$  solution in a mixed solvent of HFIP/TFE (4:1) at room temperature. (A) None; (B) **1a** (5 mM); (C)  $n\text{Bu}_4\text{NBr}$  (5 mM); (D)  $n\text{Bu}_4\text{NBr}$  (5 mM) and **1a** (5 mM). The voltammogram was obtained with Pt wire as an auxiliary electrode and a saturated calomel electrode (SCE) as a reference electrode. The scan rate was  $0.1 \text{ V s}^{-1}$  on a glassy carbon electrode (GCE) ( $d = 3 \text{ mm}$ ).

## 6. Single Crystal Structure and Data of Compound 2a

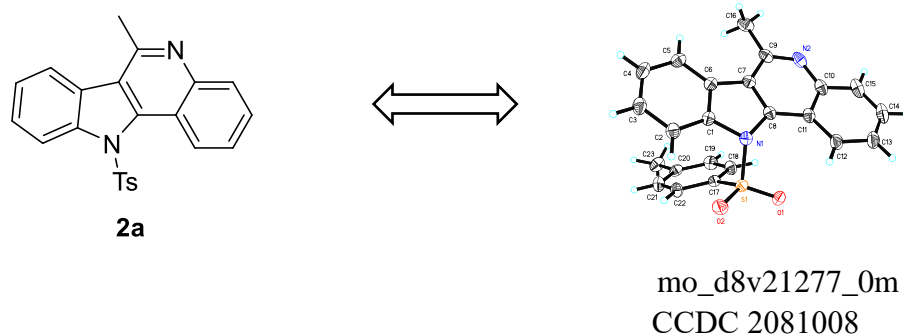

**Figure S2.** The single crystal structure of **2a**.

**Table S3.** Crystal data and structure refinement for mo\_d8v21277\_0m

|                                   |                                                                                                            |
|-----------------------------------|------------------------------------------------------------------------------------------------------------|
| Identification code               | mo_d8v21277_0m                                                                                             |
| Empirical formula                 | C <sub>23</sub> H <sub>18</sub> N <sub>2</sub> O <sub>2</sub> S                                            |
| Formula weight                    | 386.45                                                                                                     |
| Temperature                       | 213(2) K                                                                                                   |
| Wavelength                        | 0.71073 Å                                                                                                  |
| Crystal system                    | Monoclinic                                                                                                 |
| Space group                       | P 21/c                                                                                                     |
| Unit cell dimensions              | a = 8.5865(2) Å      a = 90°.<br>b = 14.3767(4) Å      b = 98.9730(10)°.<br>c = 15.4328(3) Å      g = 90°. |
| Volume                            | 1881.79(8) Å <sup>3</sup>                                                                                  |
| Z                                 | 4                                                                                                          |
| Density (calculated)              | 1.364 Mg/m <sup>3</sup>                                                                                    |
| Absorption coefficient            | 0.194 mm <sup>-1</sup>                                                                                     |
| F(000)                            | 808                                                                                                        |
| Crystal size                      | 0.200 x 0.150 x 0.130 mm <sup>3</sup>                                                                      |
| Theta range for data collection   | 2.788 to 25.996°.                                                                                          |
| Index ranges                      | -9<=h<=10, -17<=k<=17, -19<=l<=19                                                                          |
| Reflections collected             | 18815                                                                                                      |
| Independent reflections           | 3683 [R(int) = 0.0252]                                                                                     |
| Completeness to theta = 25.242°   | 99.5 %                                                                                                     |
| Absorption correction             | Semi-empirical from equivalents                                                                            |
| Max. and min. transmission        | 0.7456 and 0.6630                                                                                          |
| Refinement method                 | Full-matrix least-squares on F <sup>2</sup>                                                                |
| Data / restraints / parameters    | 3683 / 0 / 255                                                                                             |
| Goodness-of-fit on F <sup>2</sup> | 1.040                                                                                                      |
| Final R indices [I>2sigma(I)]     | R1 = 0.0360, wR2 = 0.0893                                                                                  |
| R indices (all data)              | R1 = 0.0430, wR2 = 0.0954                                                                                  |
| Extinction coefficient            | n/a                                                                                                        |
| Largest diff. peak and hole       | 0.264 and -0.313 e.Å <sup>-3</sup>                                                                         |

## 7. Reference

- [1] Bakherad, Z.; Safavi, M.; Sepehri, S.; Fassihi, A.; Sadeghi-Aliabadi, H.; Bakherad, M.; Rastegar, H.; Larijani, B.; Saghaie, L.; Mahdavi, M. Preparation of some novel imidazopyridine derivatives of indole as anticancer agents: one-pot multicomponent synthesis, biological evaluation and docking studies. *Res. Chem. Intermed.* **2019**, *45*, 5261–5290.
- [2] Simeth, N. A.; Altmann, L.-M.; Wossner, N.; Bauer, E.; Jung, M.; Konig, B. Photochromic Indolyl Fulgimides as Chromo-pharmacophores Targeting Sirtuins. *J. Org. Chem.* **2018**, *83*, 7919–7927.
- [3] Vuong, H.; Duarte, S.; Klumpp, D. A. One-Pot Reactions Involving the Fischer Indole Synthesis and Friedel–Crafts Reactions. *Top. Catal.* **2018**, *61*, 685–688.
- [4] Rivinoja, D. J.; Gee, Y. S.; Gardiner, M. G.; Ryan, J. H.; Hyland, C. J. T. The Diastereoselective Synthesis of Pyrroloindolines by Pd-Catalyzed Dearomative Cycloaddition of 1-Tosyl-2-vinylaziridine to 3-Nitroindoles. *ACS Catal.* **2017**, *7*, 1053–1056.
- [5] Lee, J. S.; Shin, J.; Lee, H.-S.; Shin, H. J.; Lee, Y.-J. A Concise and Rapid Approach to the Marine Natural Product Streptochlorin and its Analogues. *Bull. Korean Chem. Soc.* **2013**, *34*, 357–358.
- [6] Simon, G.; Couthon-Gourves, H.; Haelters, J.-P.; Corbel, B.; Kervarec, N.; Michaud, F.; L. Meijer, Towards the Syntheses of N-H and N-Alkylated Derivatives of Meridianins. *J. Heterocyclic Chem.* **2007**, *44*, 793–801.
- [7] Vaillant, F. L.; Garreau, M.; Nicolai, S.; Gryn'ova, G.; Corminboeuf, C.; Waser, J. Fine-tuned organic photoredox catalysts for fragmentation-alkynylation cascades of cyclic oxime ethers. *Chem. Sci.* **2018**, *9*, 5883–5889.
- [8] Tu, J.-L.; Liu, J.-L.; Tang, W.; Su, M.; Liu, F. Radical Aza-Cyclization of  $\alpha$ -Imino-oxy Acids for Synthesis of Alkene-Containing N-Heterocycles via Dual Cobaloxime and Photoredox Catalysis. *Org. Lett.* **2020**, *22*, 1222–1226.
- [9] Yang, S.-D.; Sun, C.-L.; Fang, Z.; Li, B.J.; Li, Y.Z.; Shi, Z.-J.; Palladium-Catalyzed Direct Arylation of (Hetero)Arenes with Aryl Boronic Acids. *Angew. Chem. Int. Ed.* **2008**, *47*, 1473–1476.
- [10] Hu, X.; Shao, Y.; Xie, H.; Chen, X.; Chen, F.; Ke, Z.; Jiang, H.; Zeng, W. Direct Carbon–Carbon  $\sigma$  Bond Amination of Unstrained Arylalkylketones. *ACS Catal.* **2020**, *10*, 8402–8408.
- [11] Ortega, N.; Urban, S.; Beiring, B.; Glorius, F.; Ruthenium NHC Catalyzed Highly Asymmetric Hydrogenation of Benzofurans. *Angew. Chem. Int. Ed.* **2012**, *51*, 1710–1713.
- [12] Liu, W.; Jiang, X.; Zhang, W.; Jiang, F.; Fu, L.; Synthesis and Antibacterial Activity Study of C-3  $\alpha$ ,  $\beta$ -Unsaturated Ketone Linked Benzofuran Derivatives. *Organic Chem Curr Res* **2016**, *5*, 164.
- [13] Tosatti, P.; Pfaltz, A.; Iridium-Catalyzed Asymmetric Hydrogenation of Benzo[b]thiophene 1,1-Dioxides. *Angew. Chem. Int. Ed.* **2017**, *56*, 4579–4582.
- [14] Luyksaar, S. I.; Migulin, V. A.; B. Nabatov, V.; Krayushkin, M. M.; Synthesis and photochromism of functionalized benzothiophene-based fulgides and fulgimides. *Russ.*

*Chem. Bull., Int. Ed.* **2010**, *59*, 446–451.

[15] Cacchi, S.; Fabrizi, G.; Filisti, E.; N-Propargylic  $\alpha$ -Enaminones: Common Intermediates for the Synthesis of Polysubstituted Pyrroles and Pyridines. *Org. Lett.* **2008**, *13*, 2629–2632.

[16] Zhao, H.-B.; Liu, Z.-J.; Song, J.; Xu, H.-C.; Reagent-Free C–H/N–H Cross-Coupling: Regioselective Synthesis of N-Heteroaromatics from Biaryl Aldehydes and  $\text{NH}_3$ . *Angew. Chem. Int. Ed.* **2017**, *56*, 12732–12735.

[17] Jiang, H.; An, X.; Tong, K.; Zheng, T.; Zhang, Y.; Yu, S. Visible-Light-Promoted Iminyl-Radical Formation from Acyl Oximes: A Unified Approach to Pyridines, Quinolines, and Phenanthridines. *Angew. Chem. Int. Ed.* **2015**, *127*, 4127–4131.

## 8. NMR Spectra for products

### Compound 2a

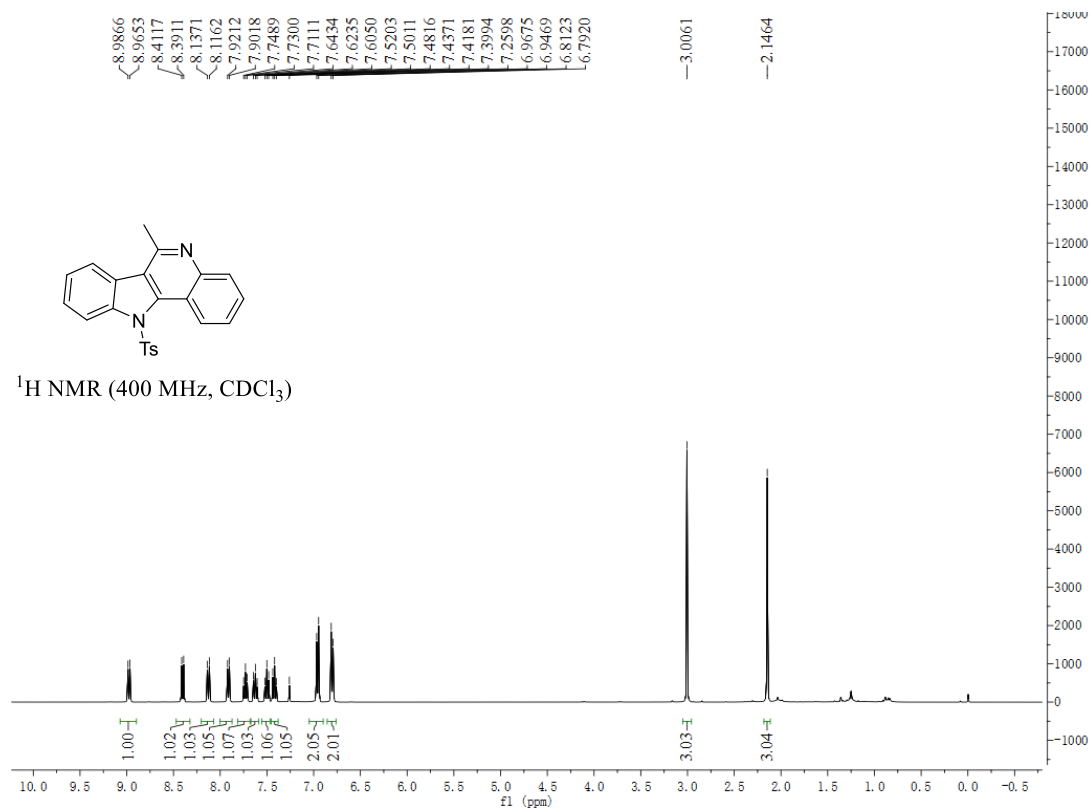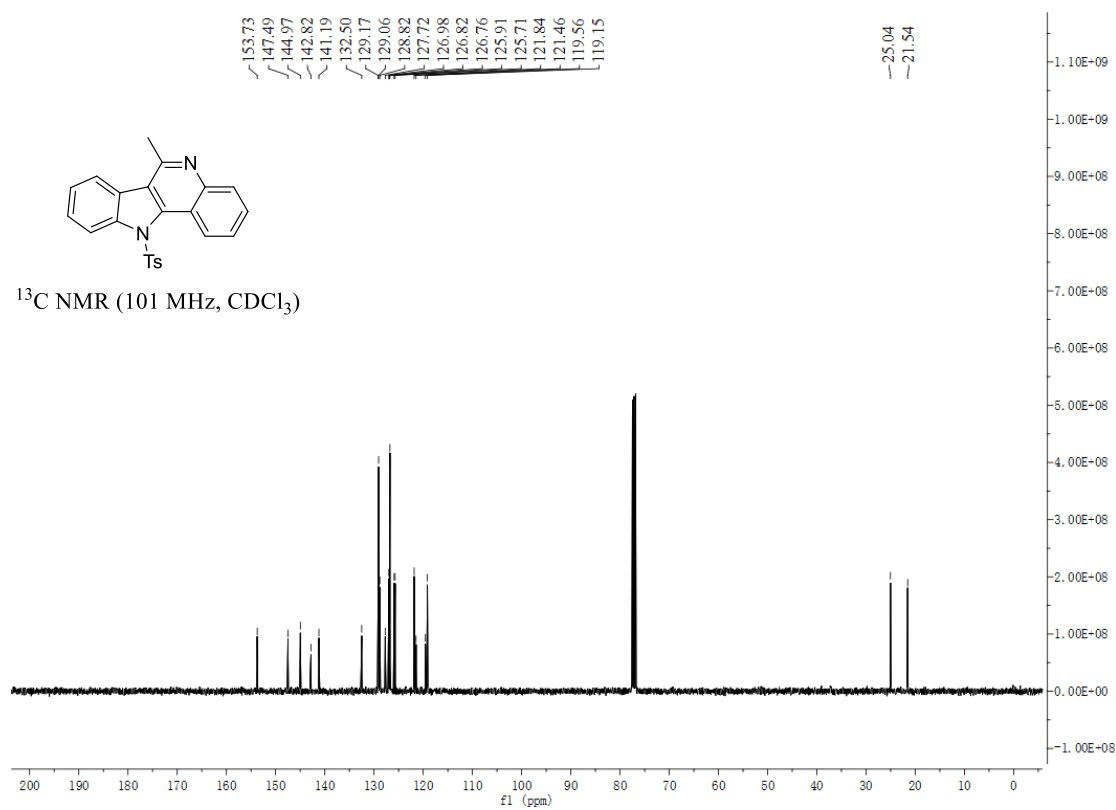

## Compound 2b

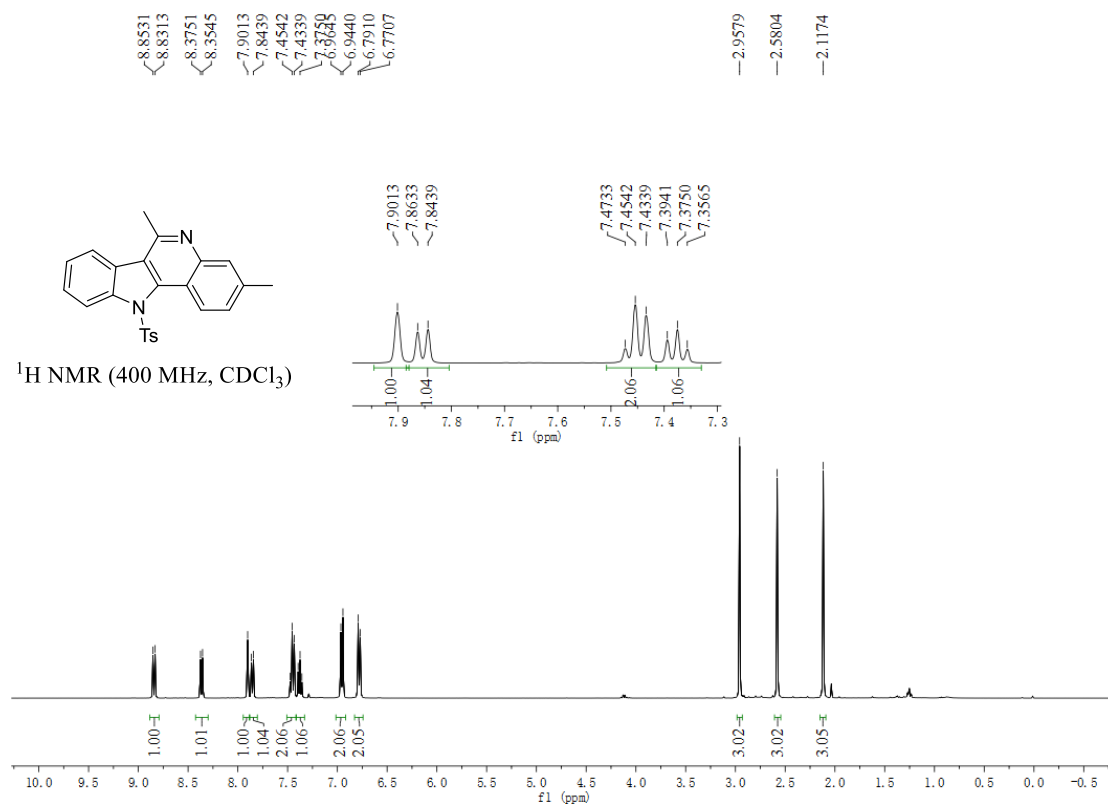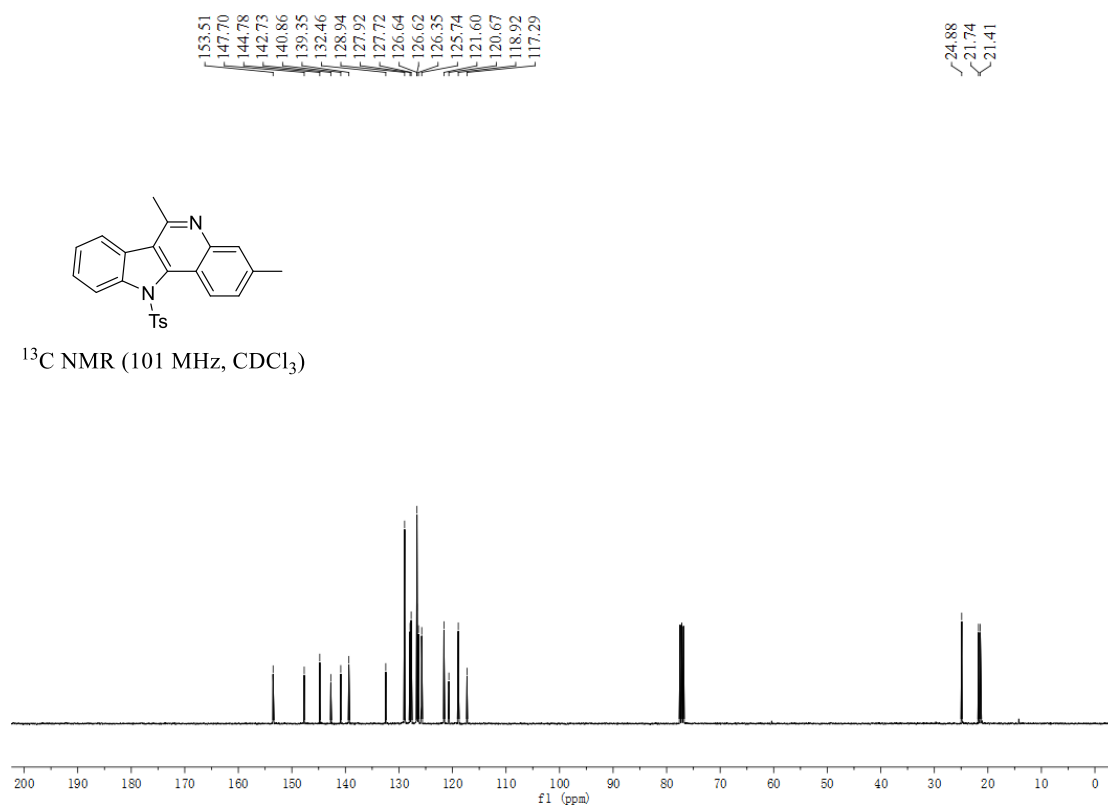

## Compound 2c

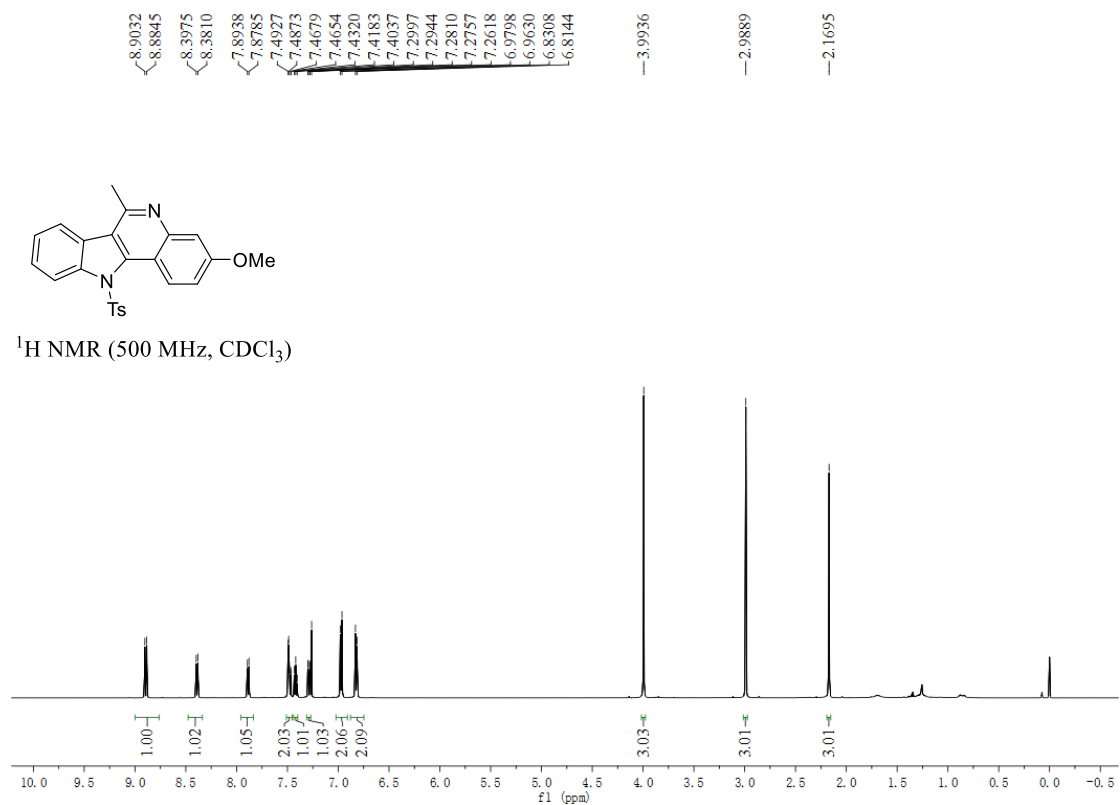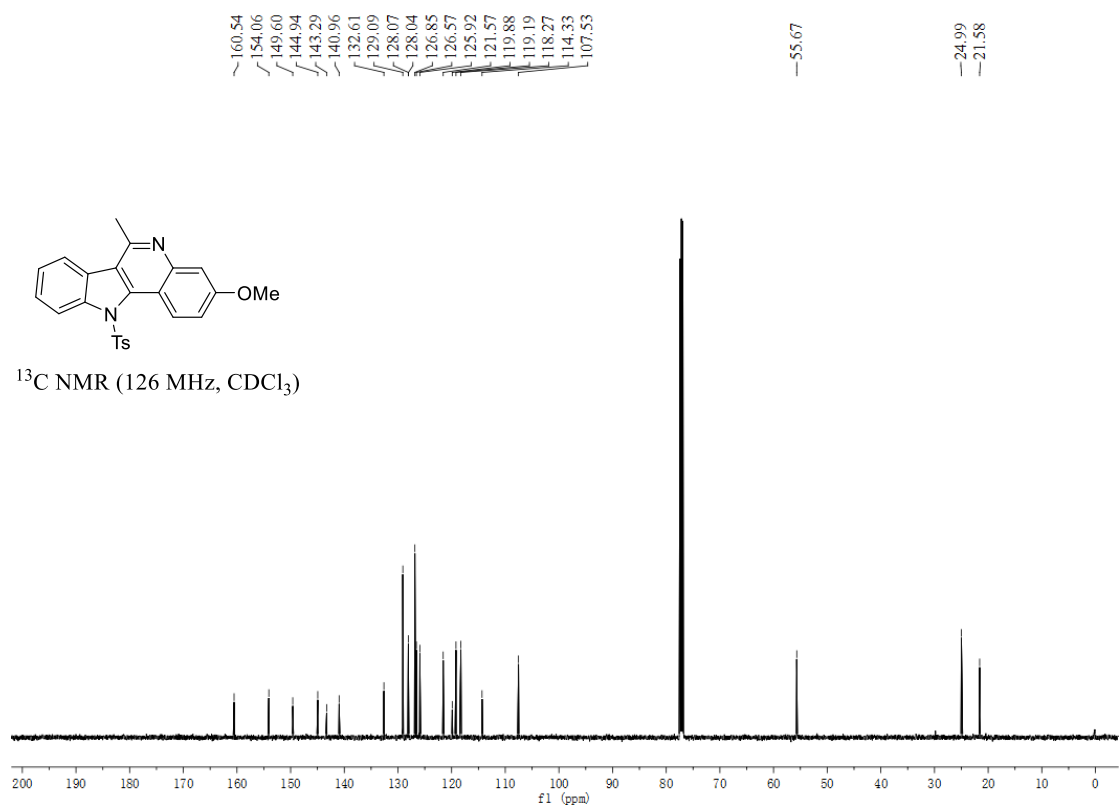

# Compound 2d

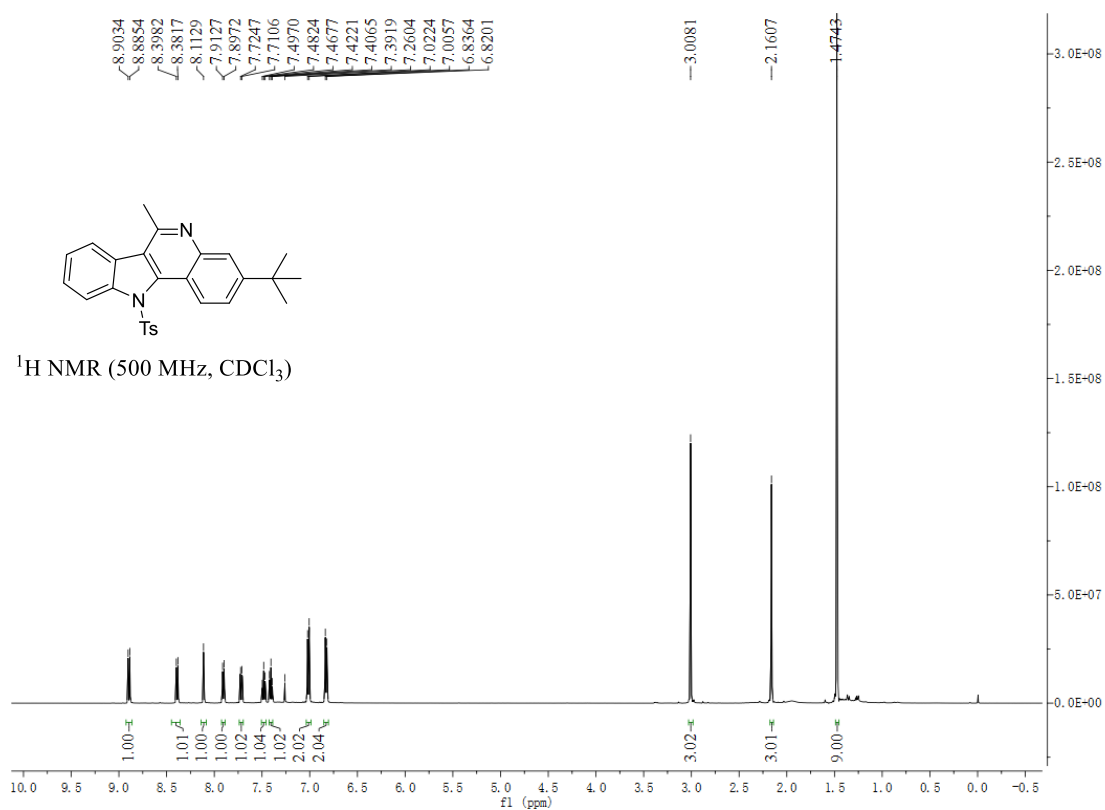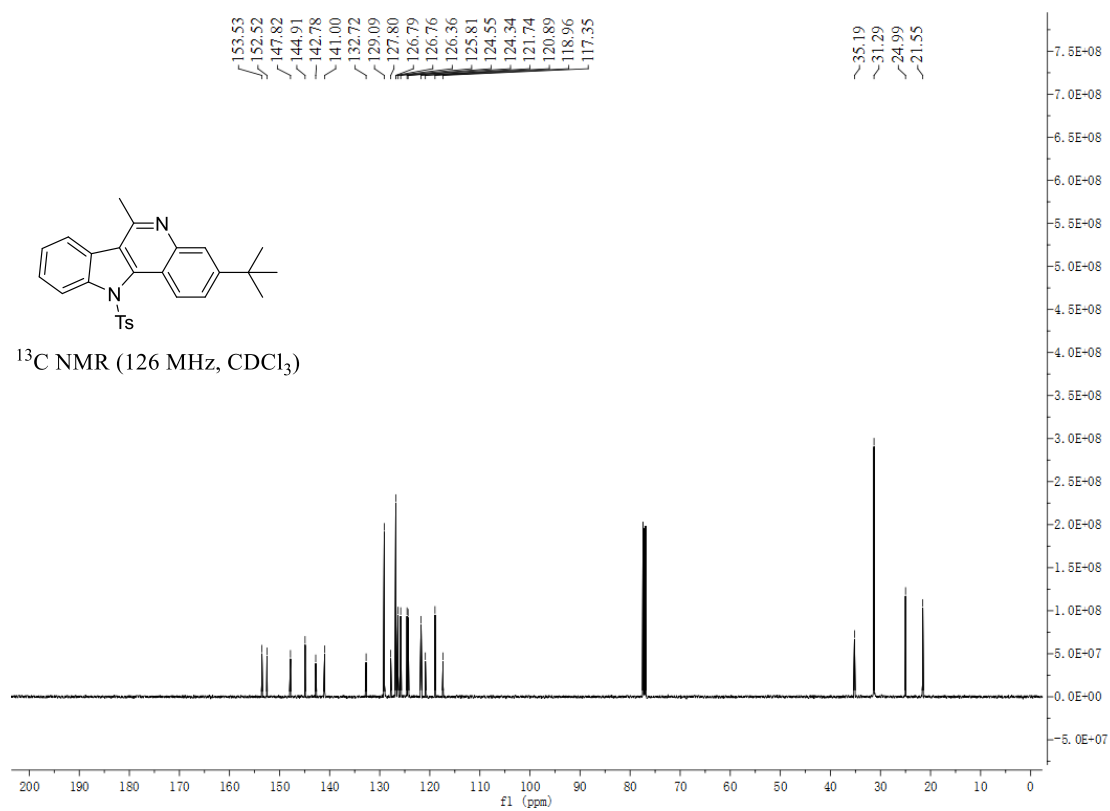

## Compound 2e

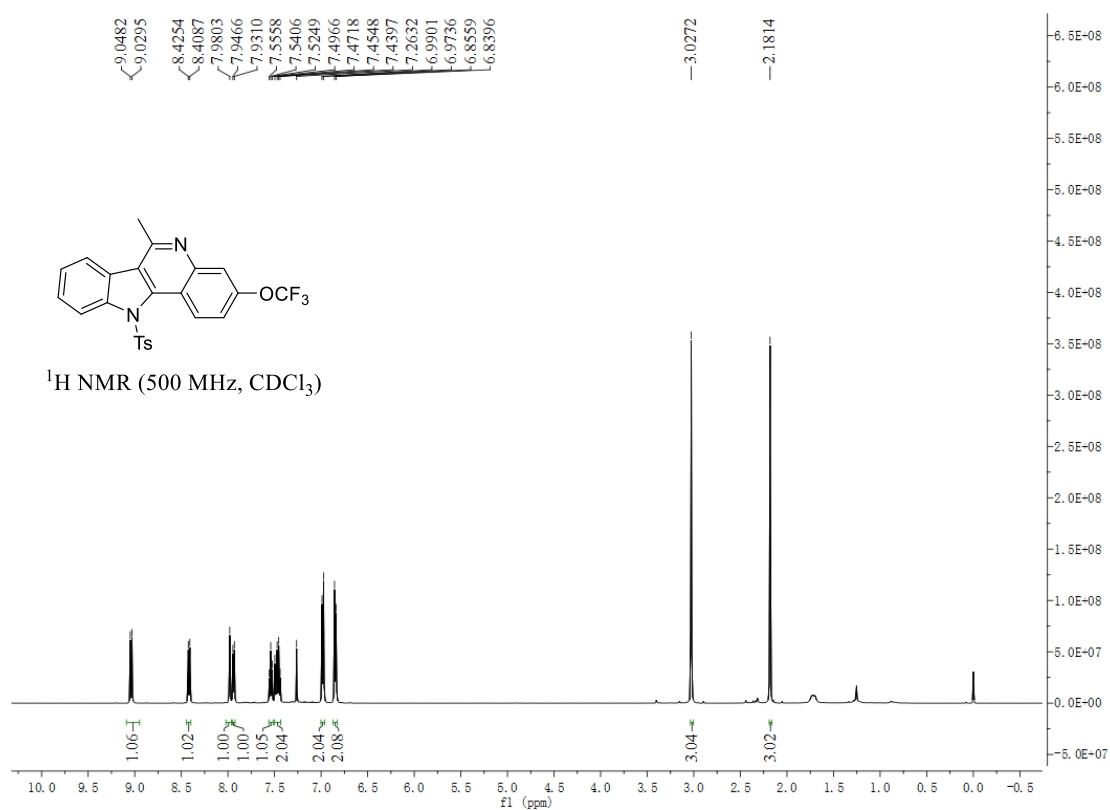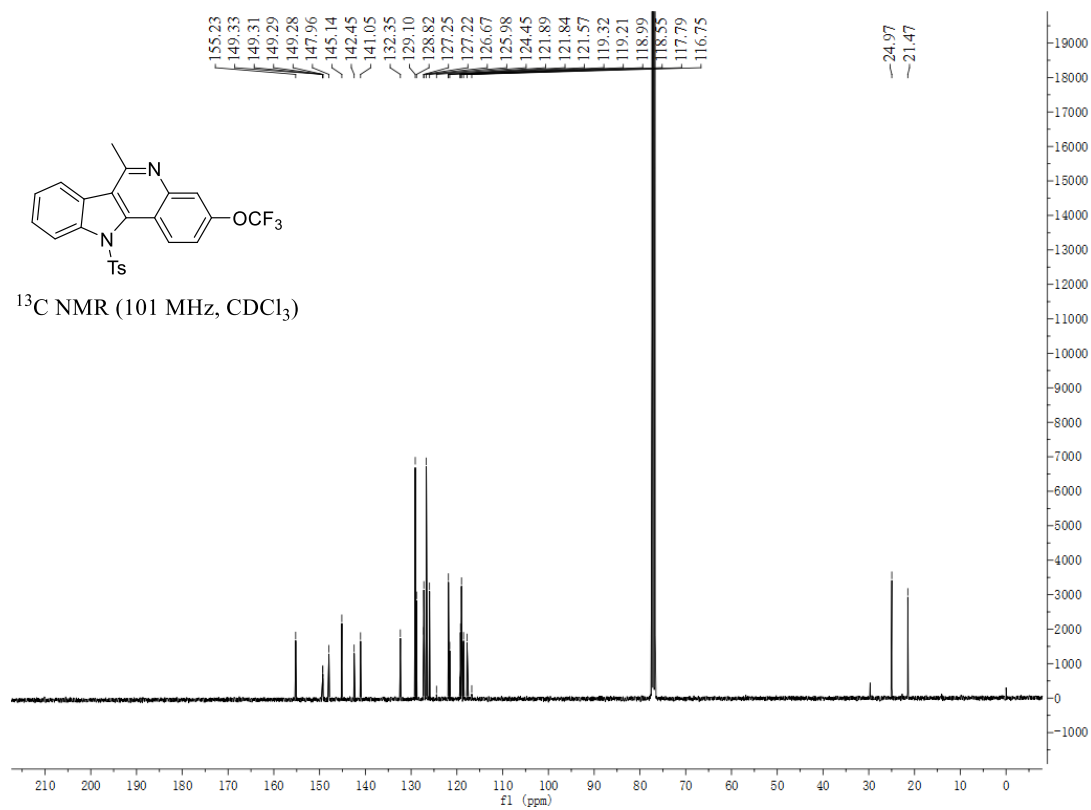

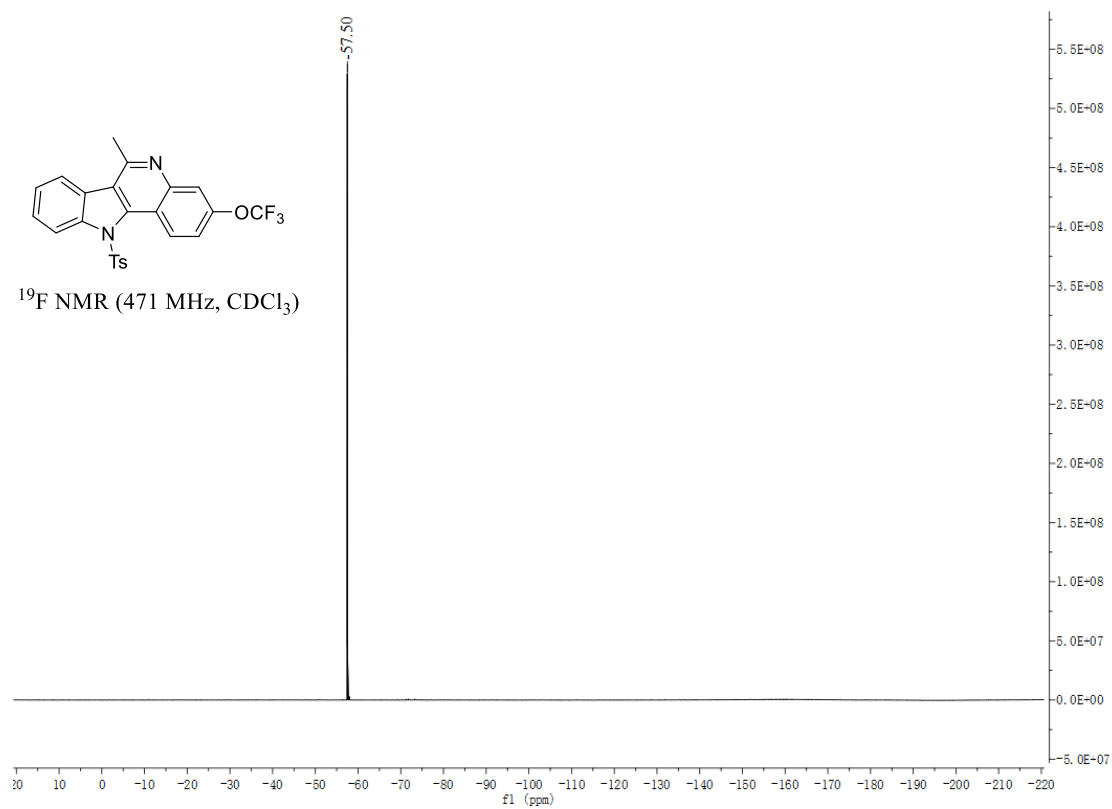

## Compound 2f

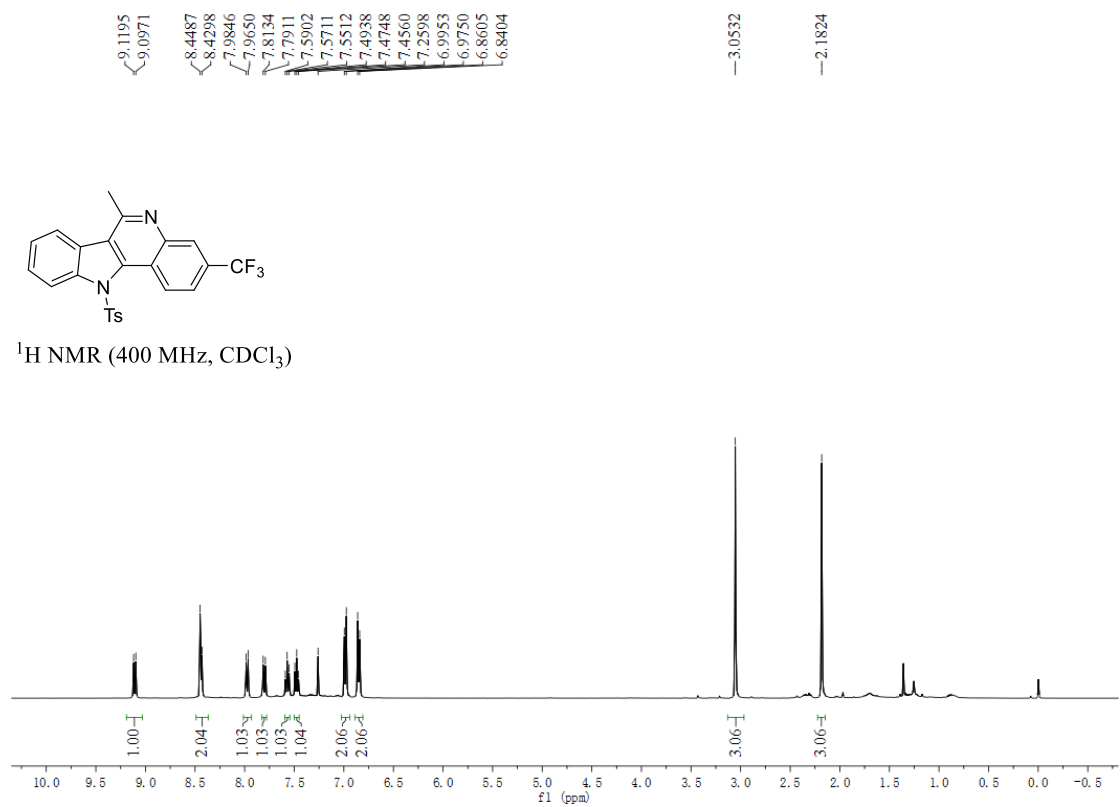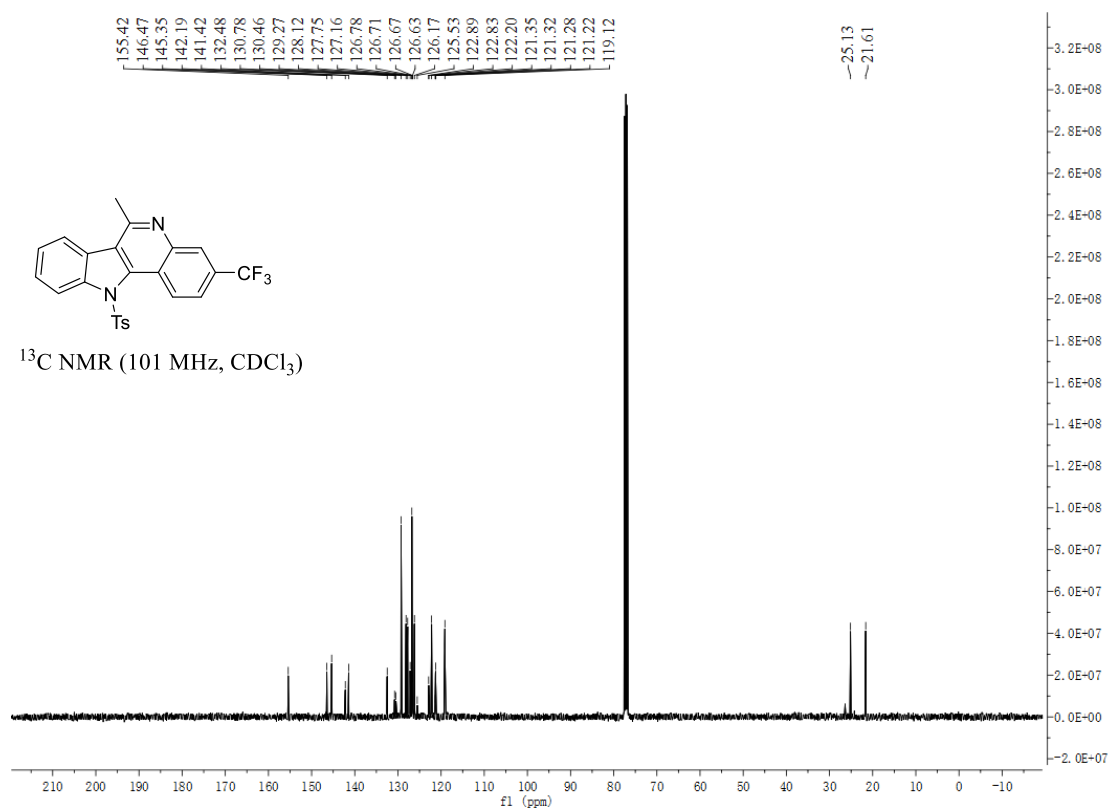

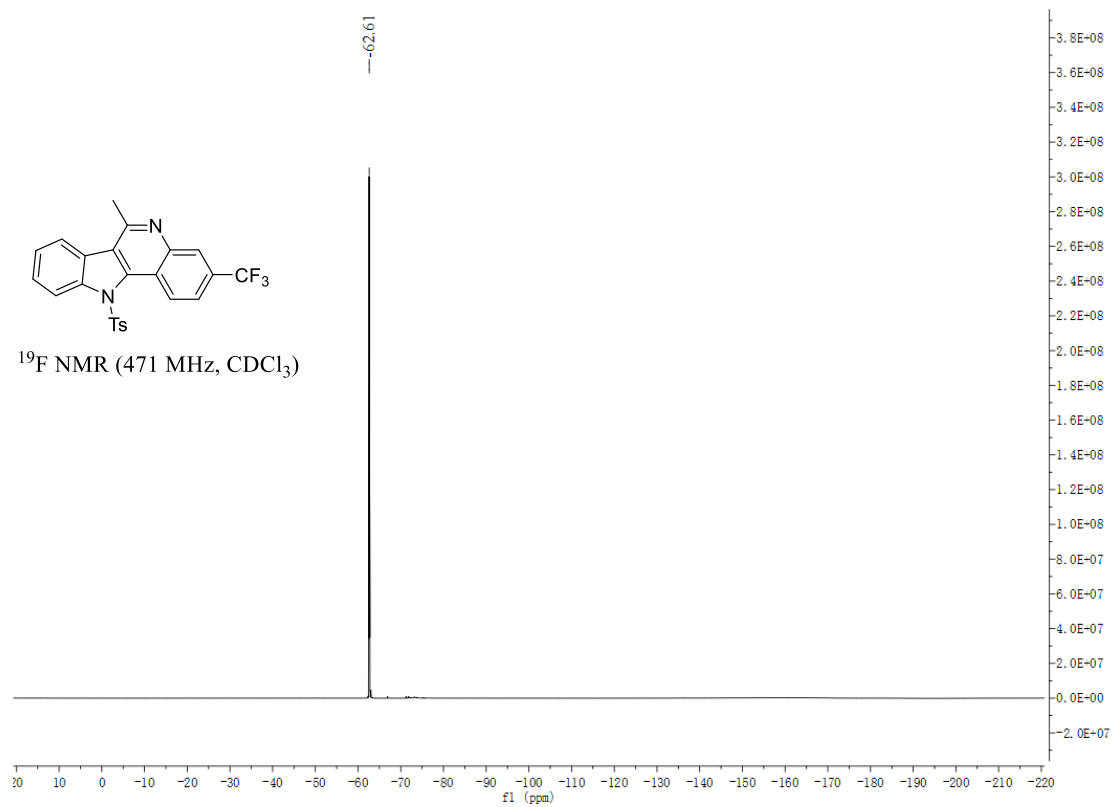

## Compound 2g

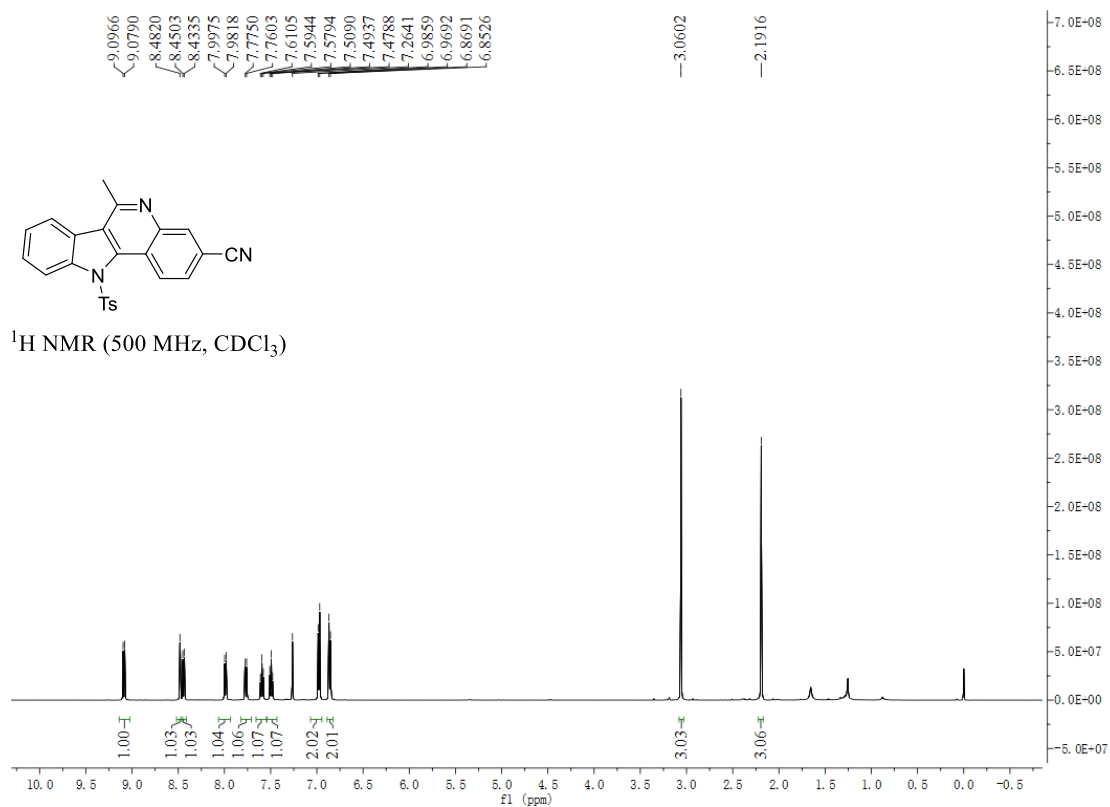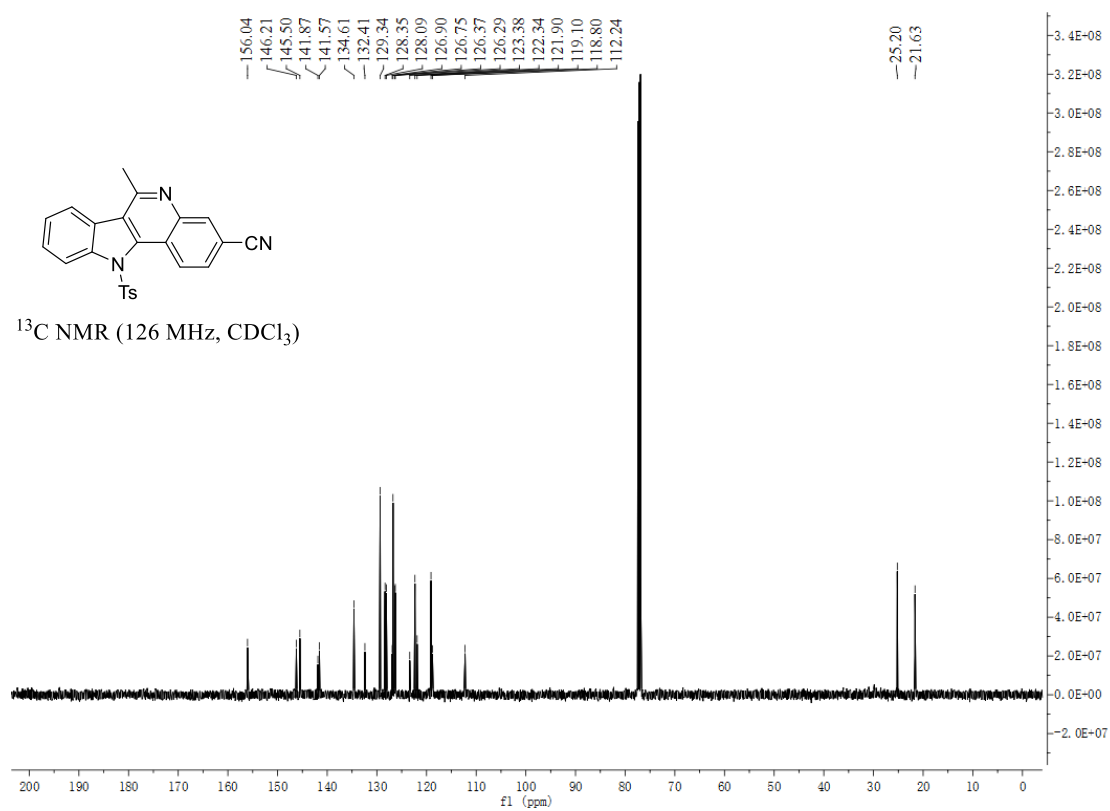

## Compound 2h

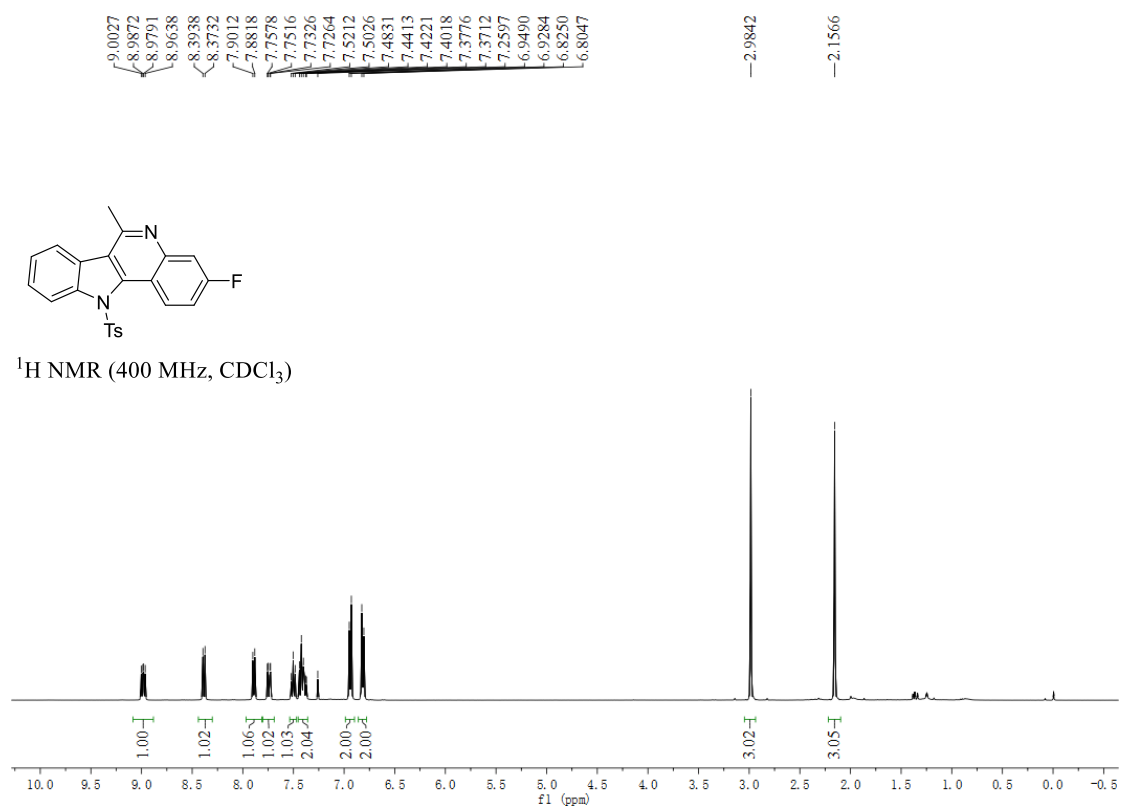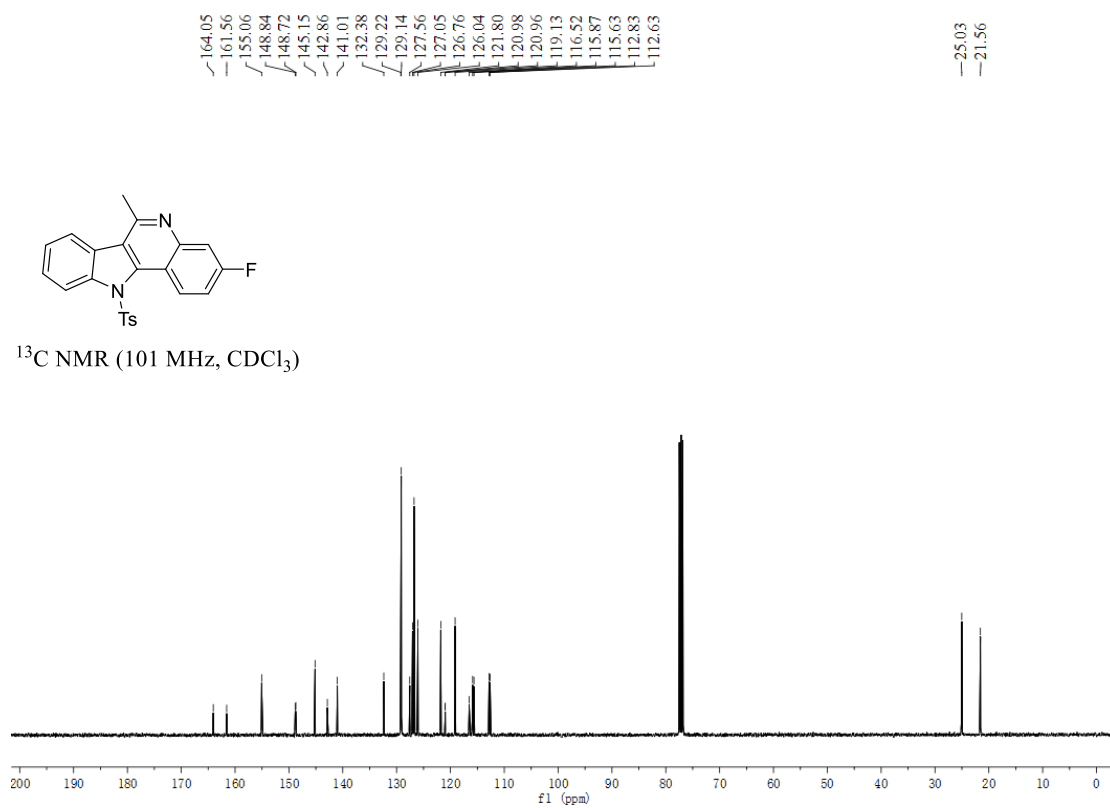

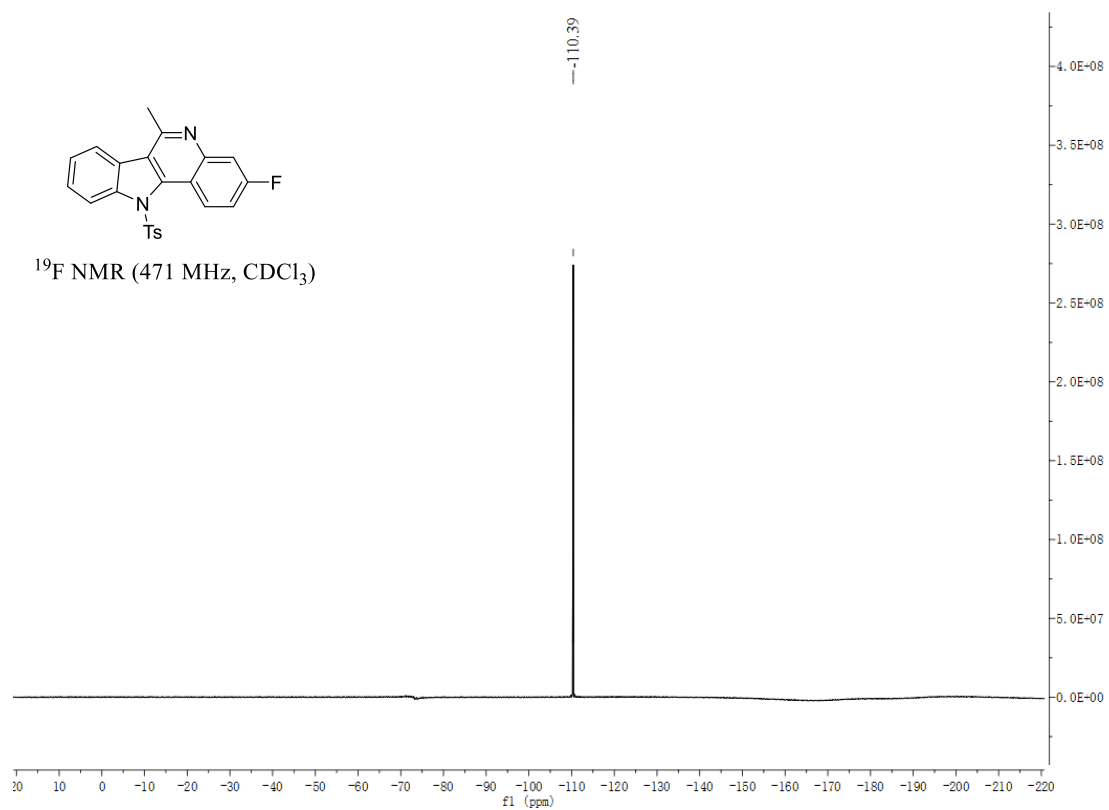

## Compound 2i

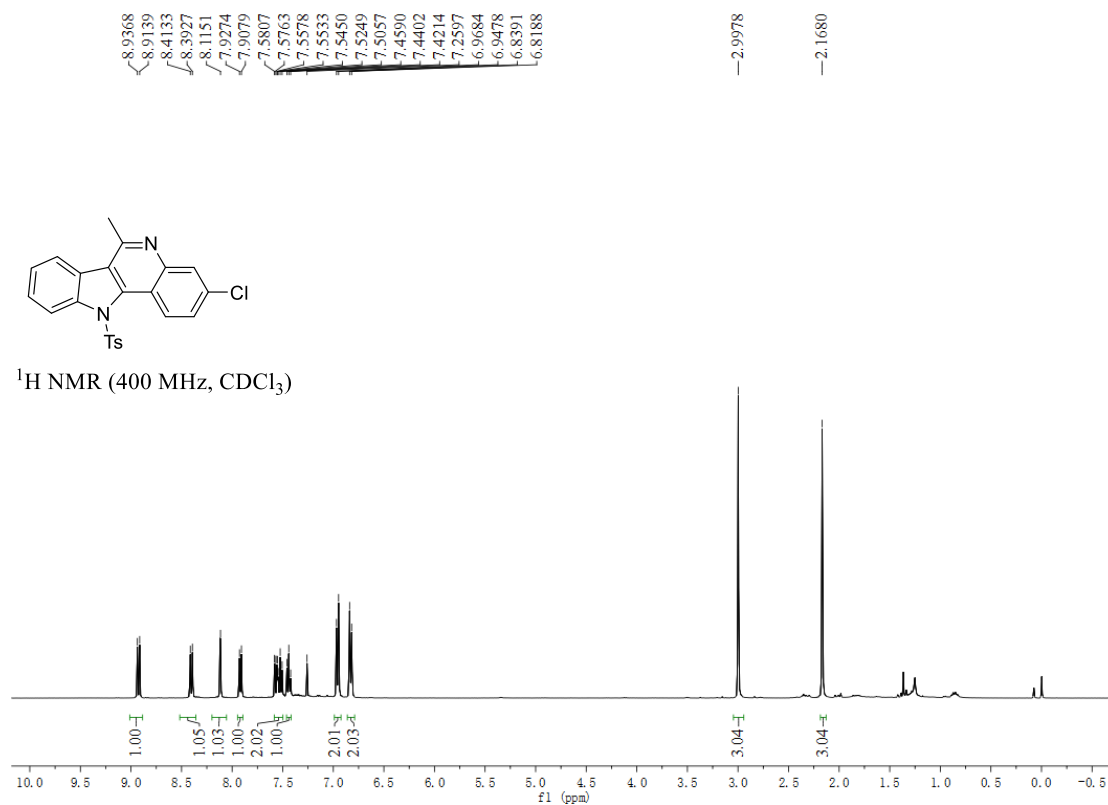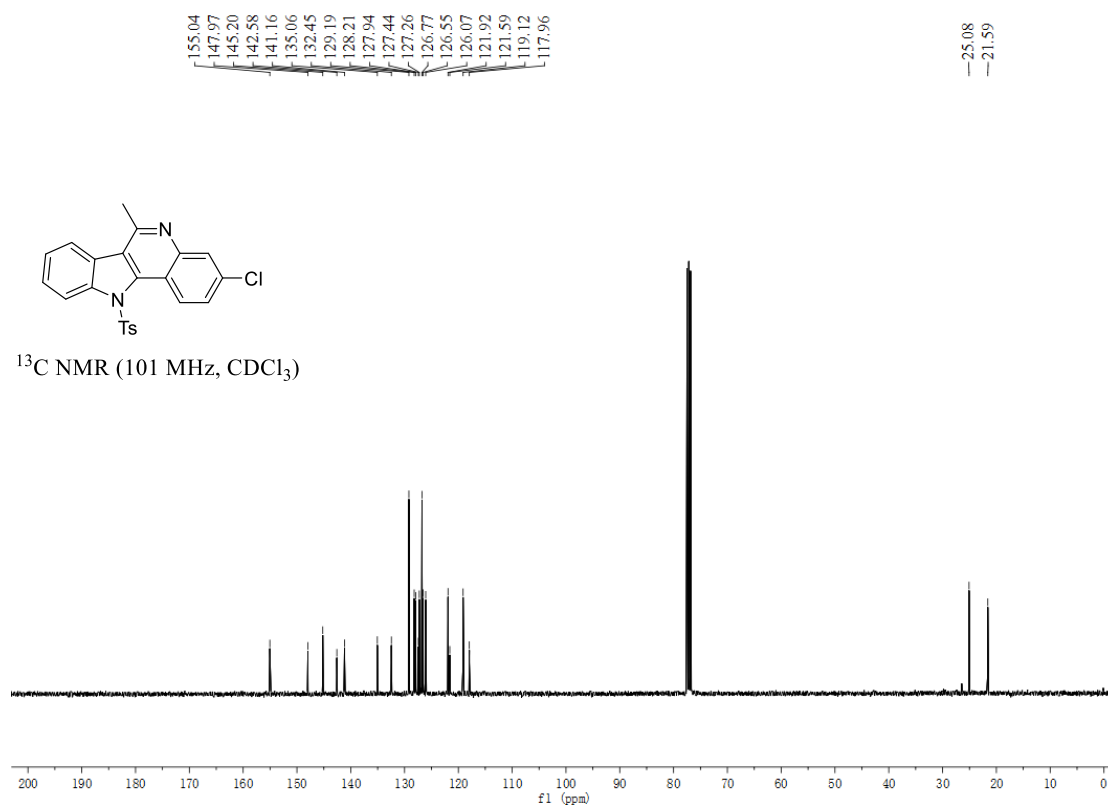

## Compound 2j

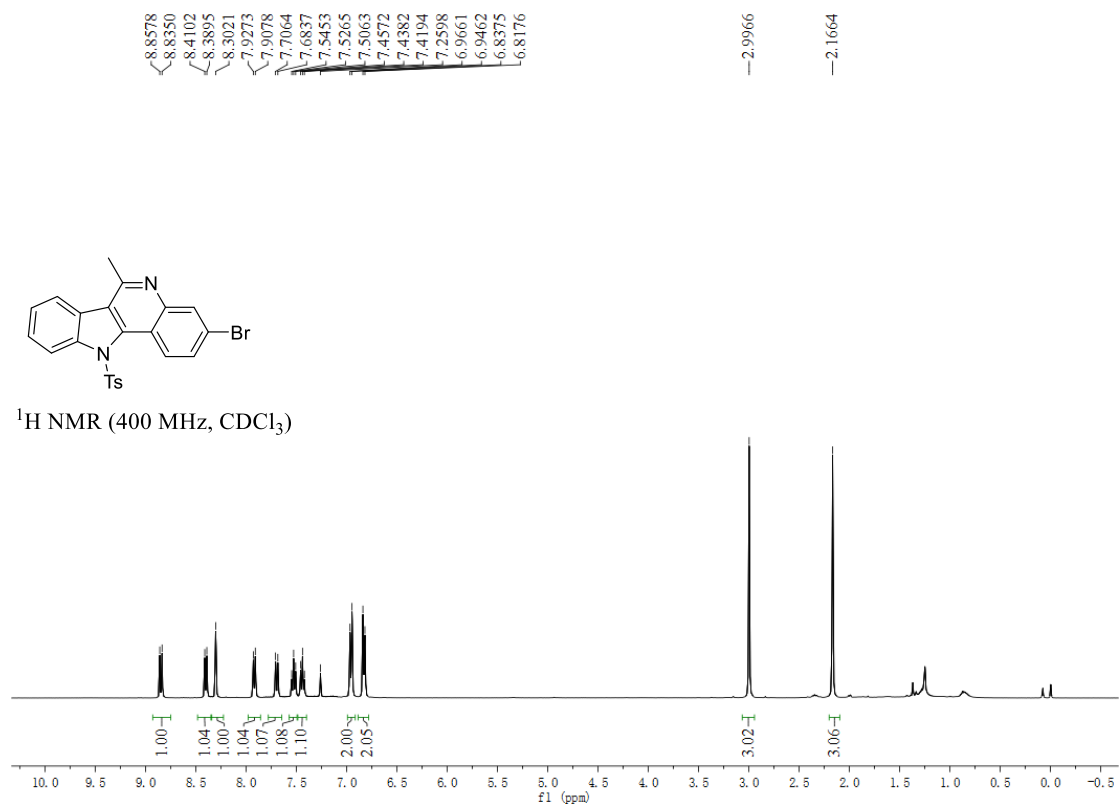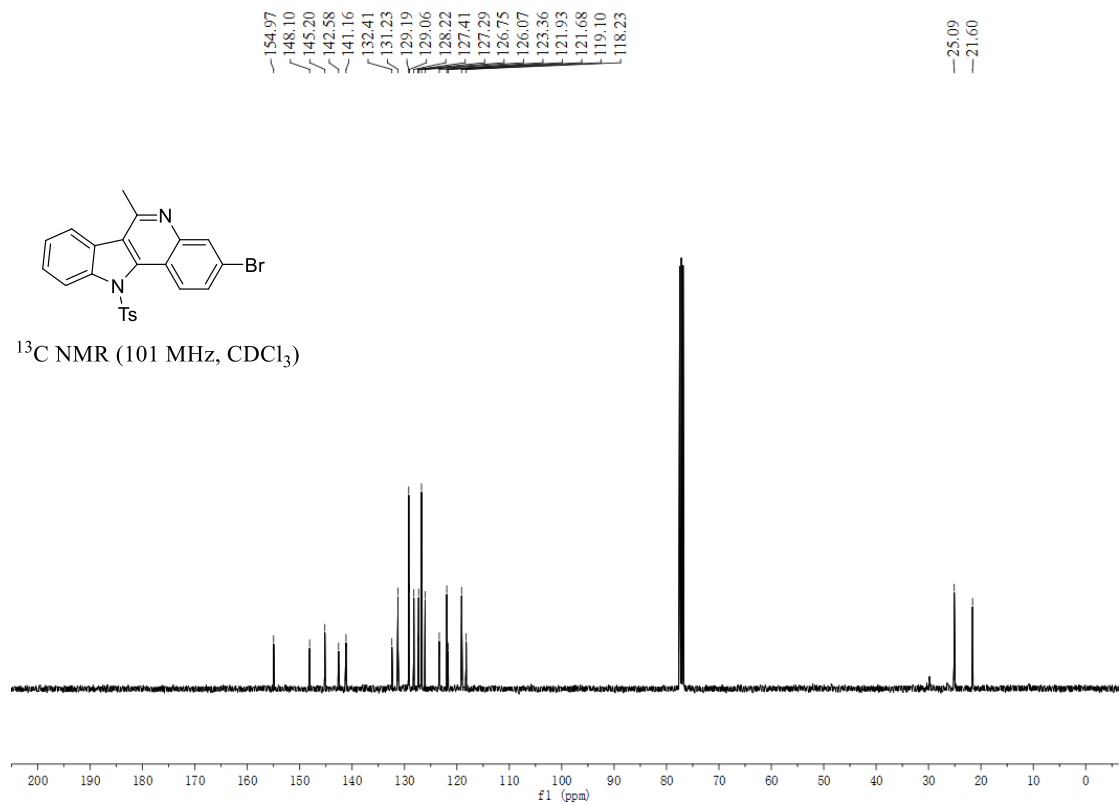

## Compound 2k

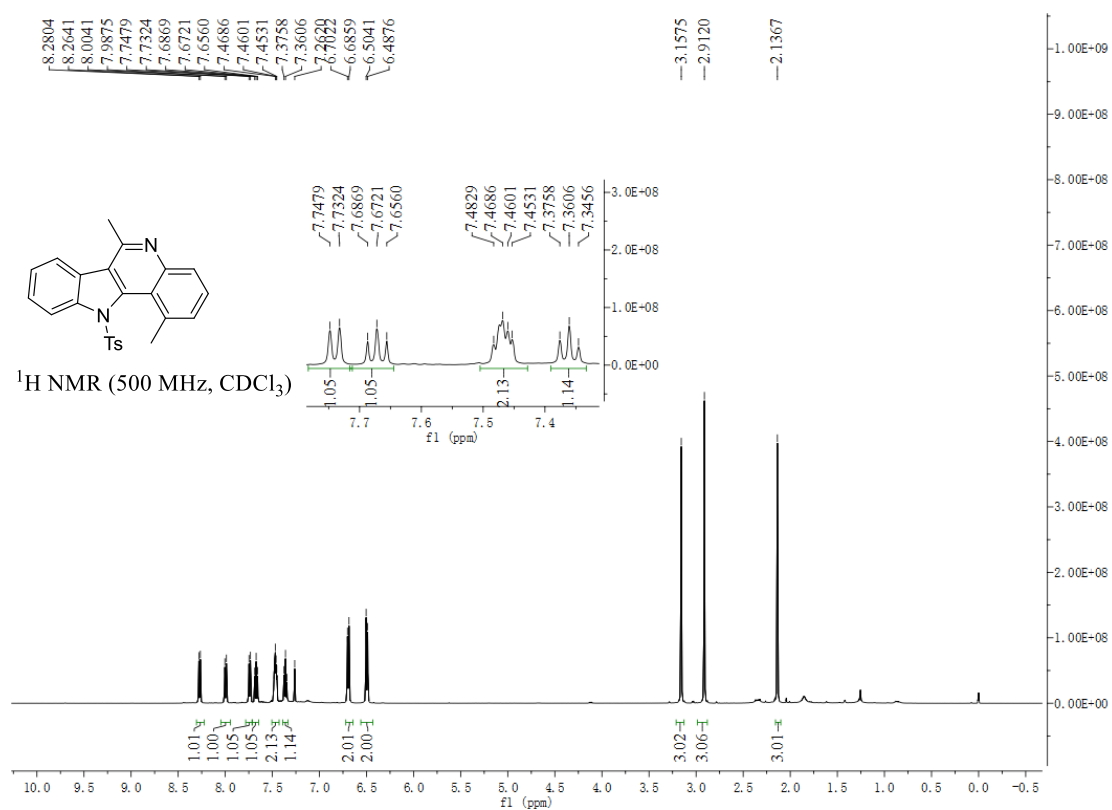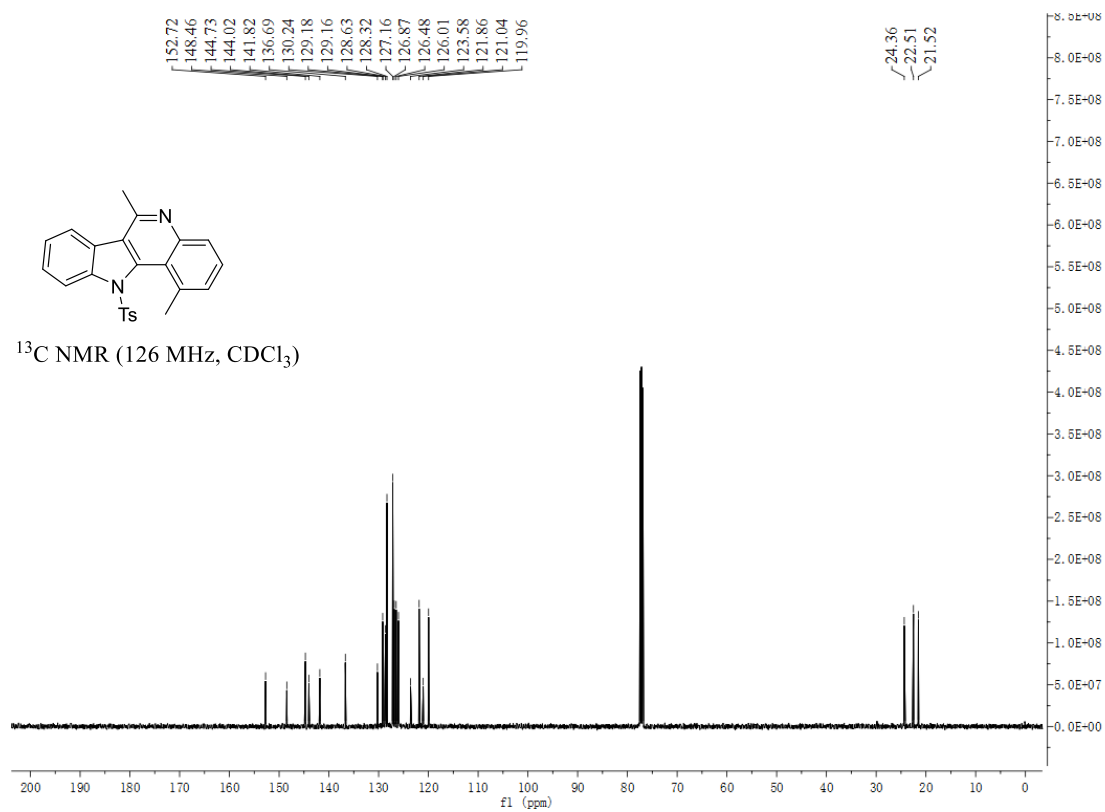

# Compound 2l

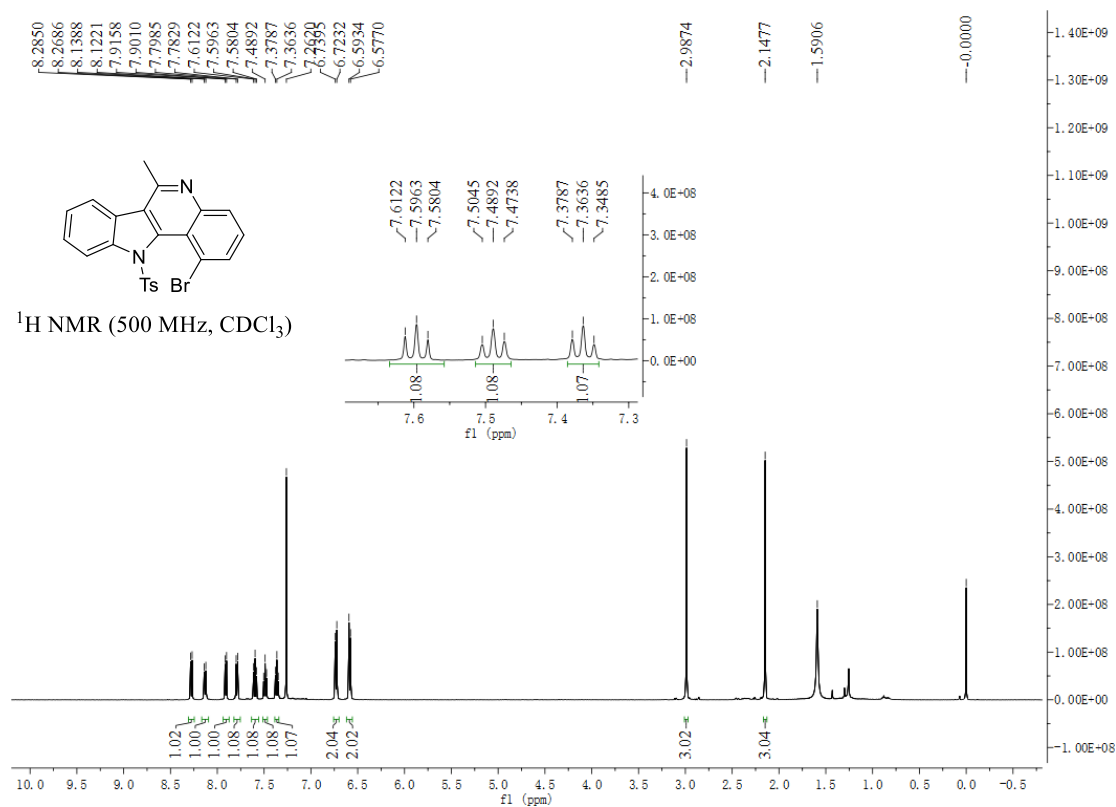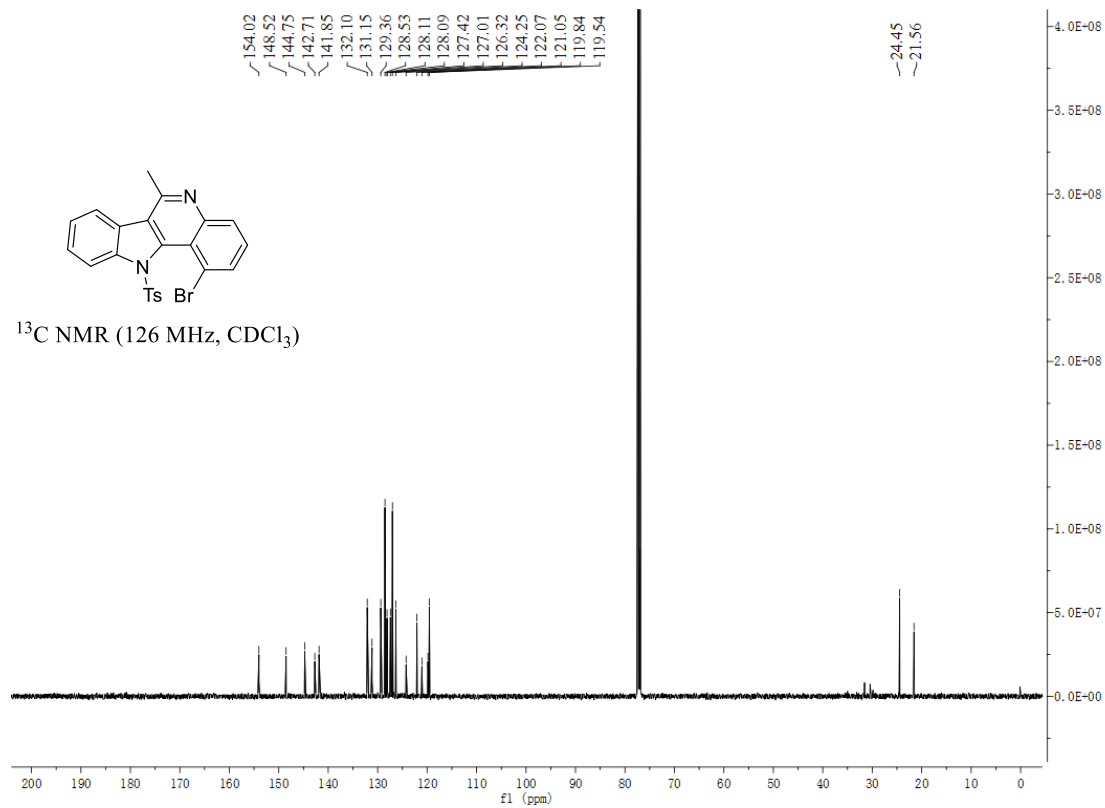

## Compound 2m

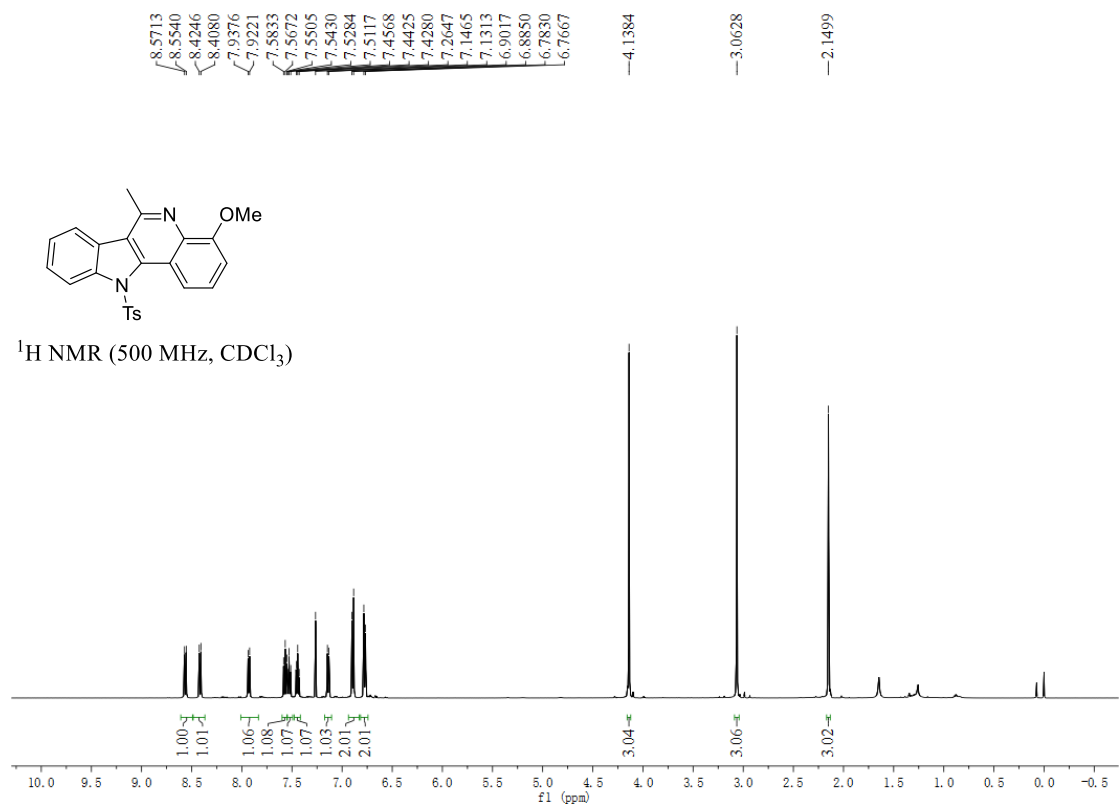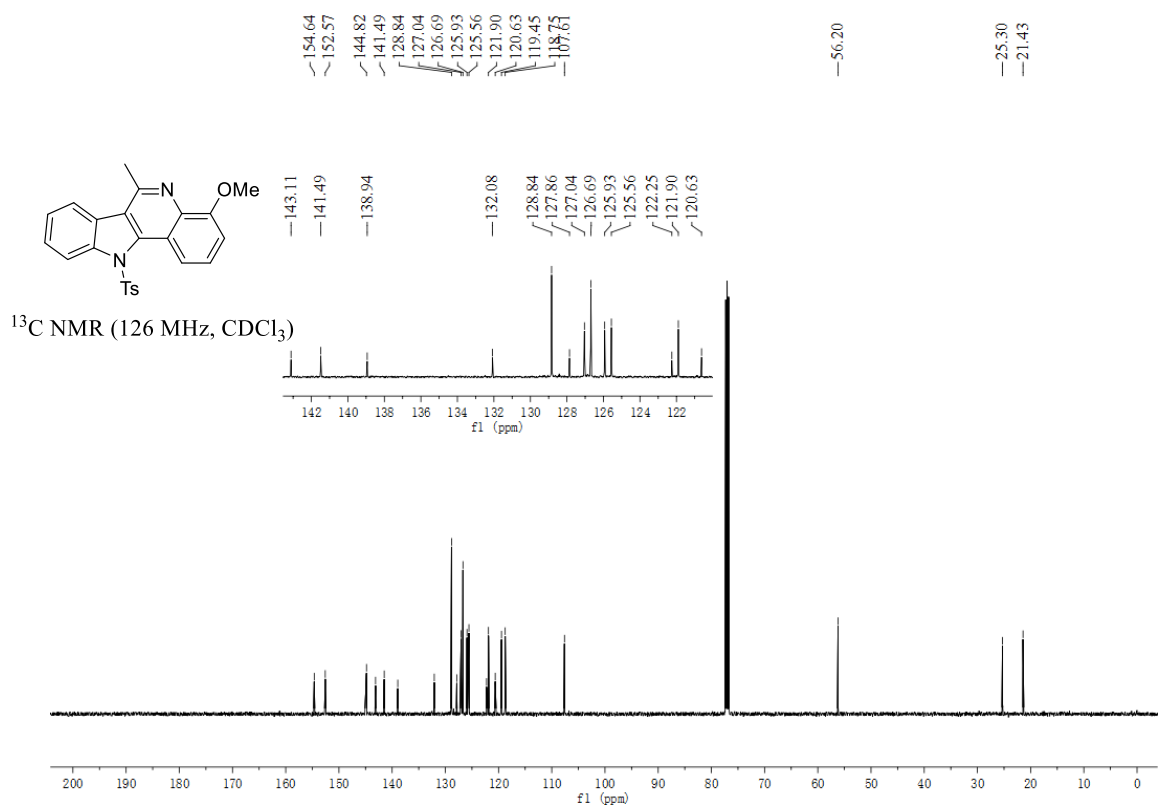

## Compound 2m'

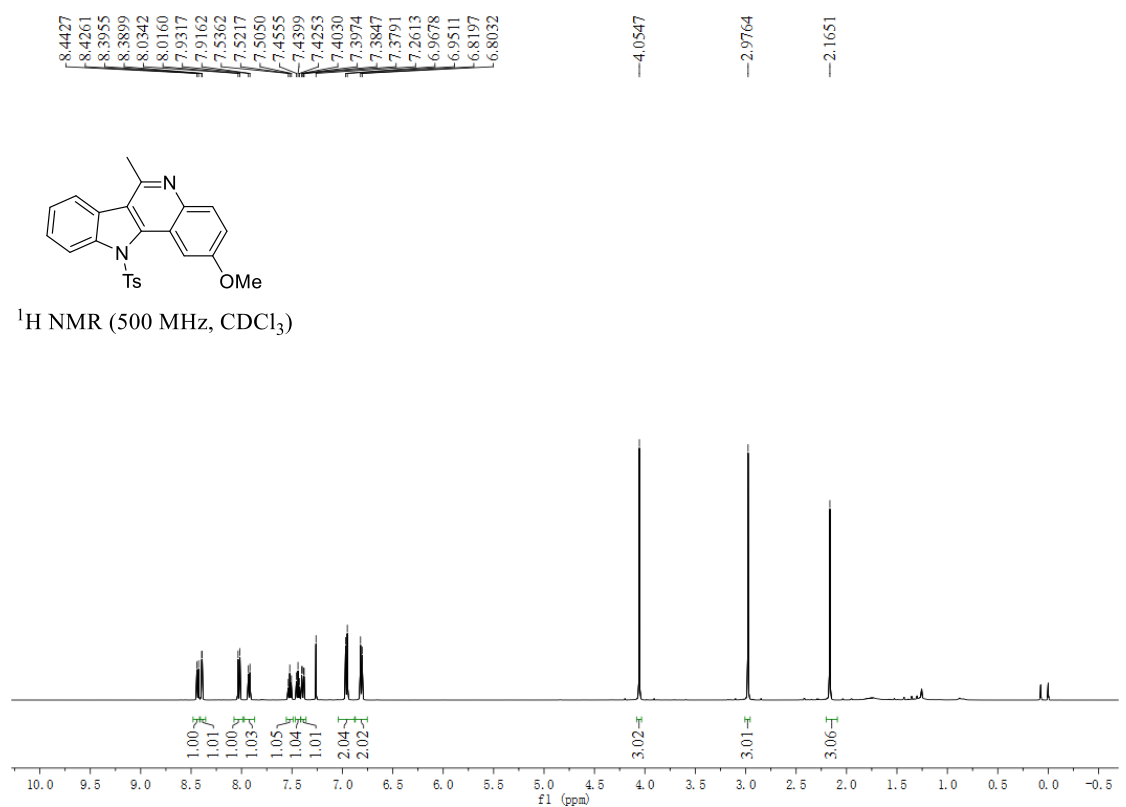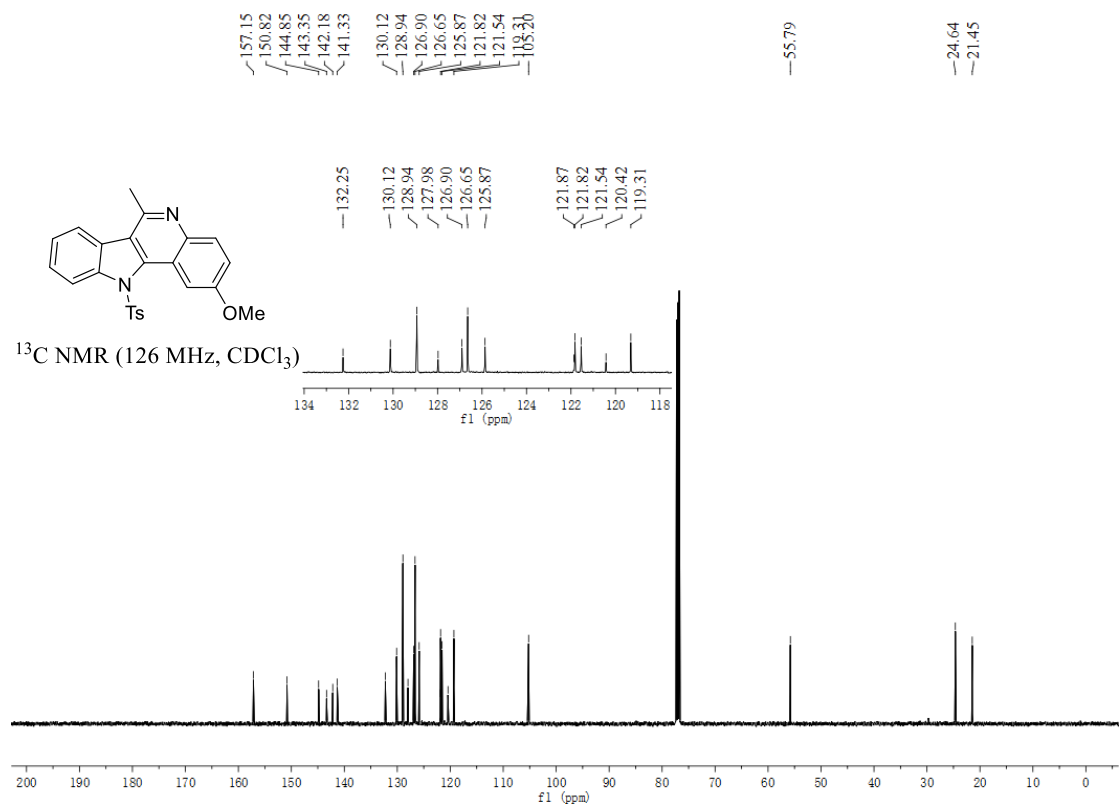

## Compound 2n

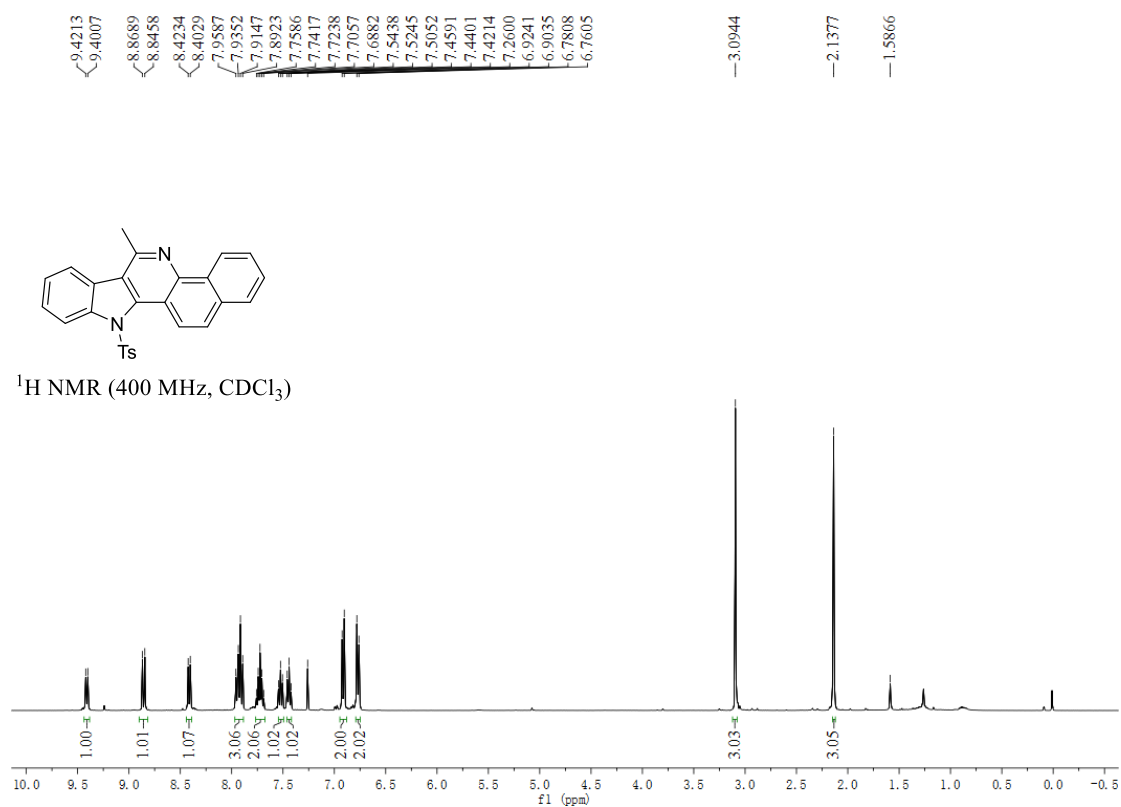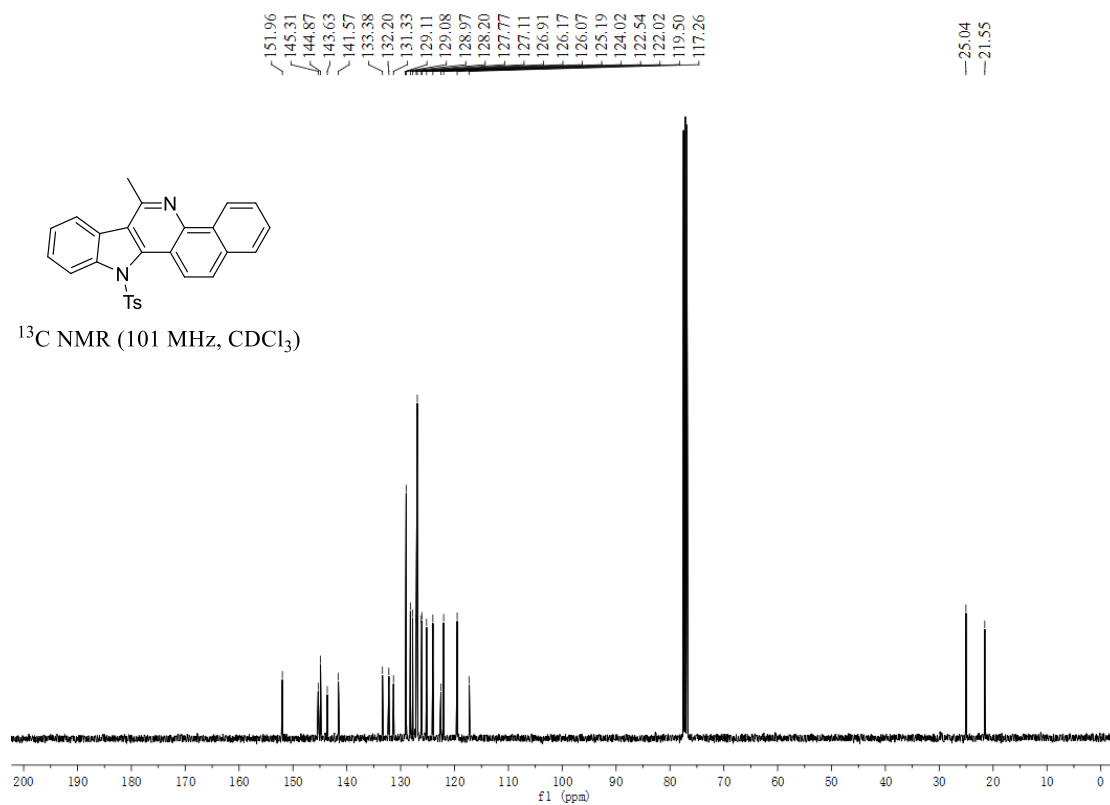

## Compound 2o

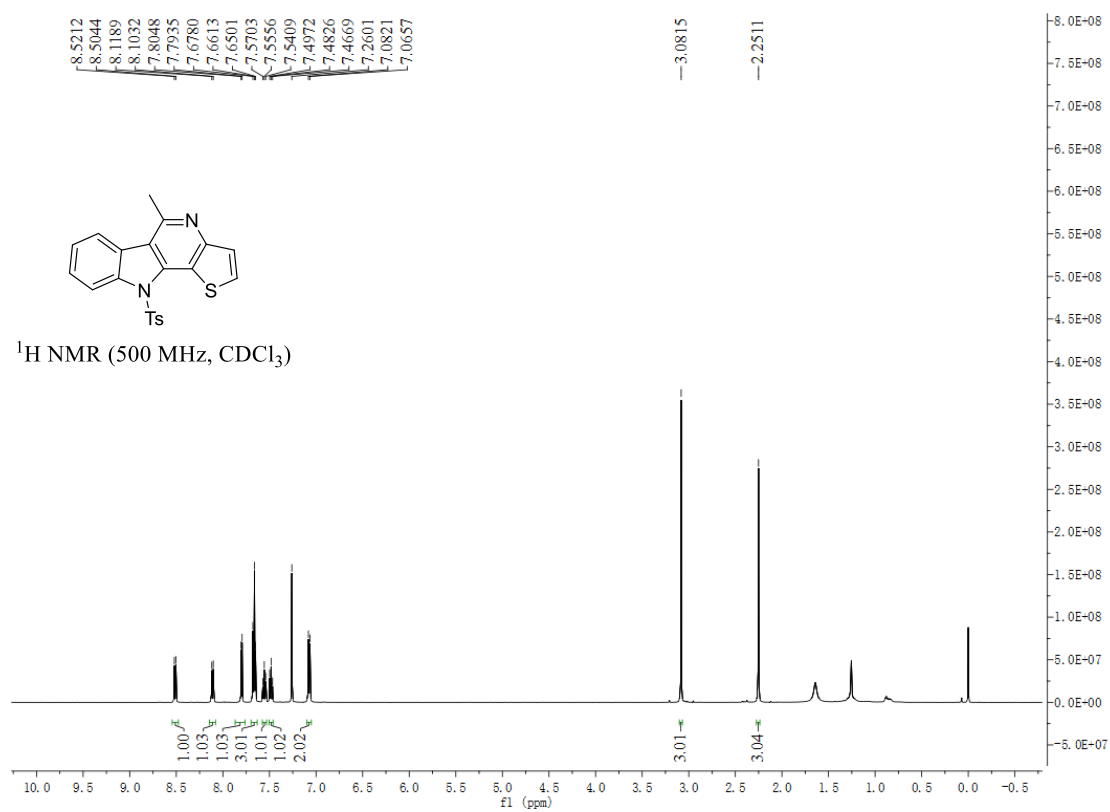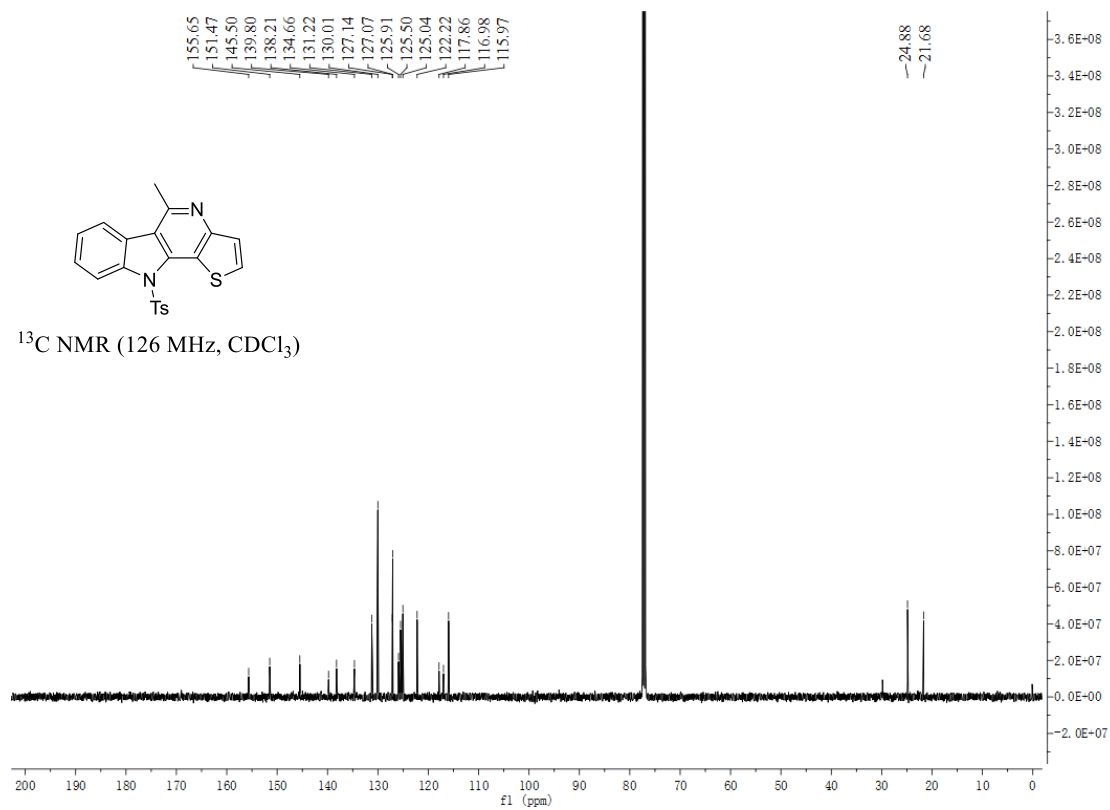

## Compound 2p

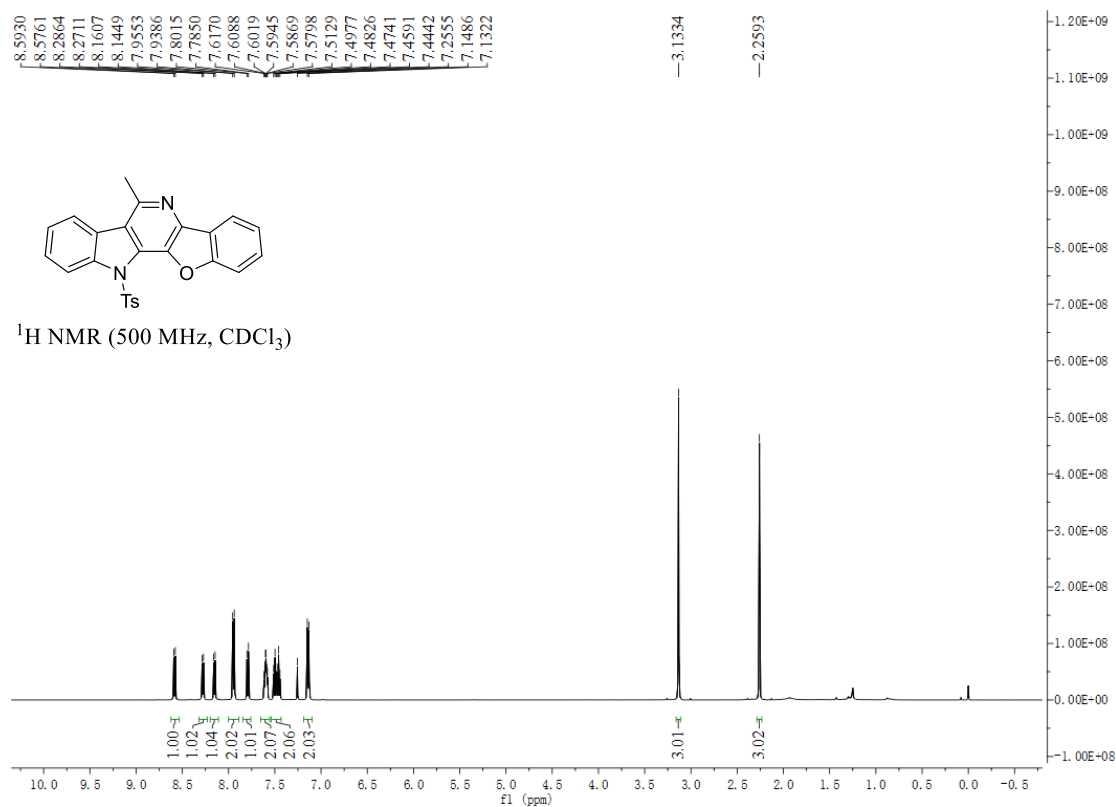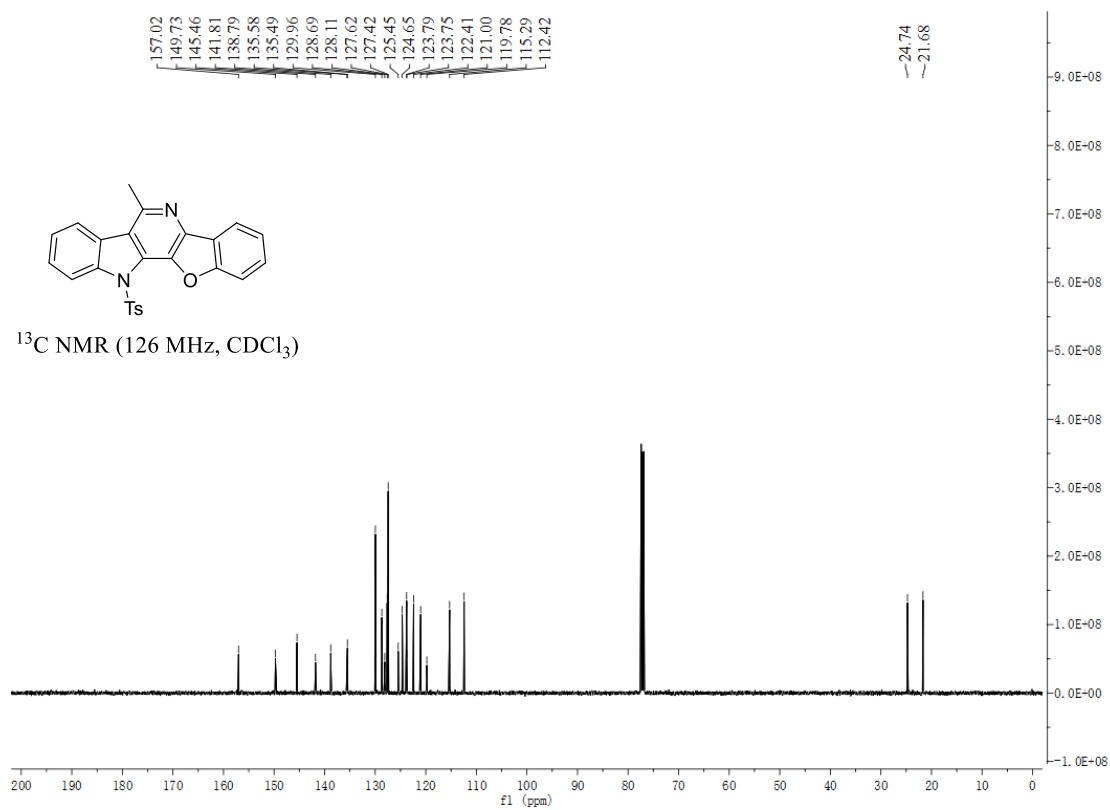

## Compound 2q

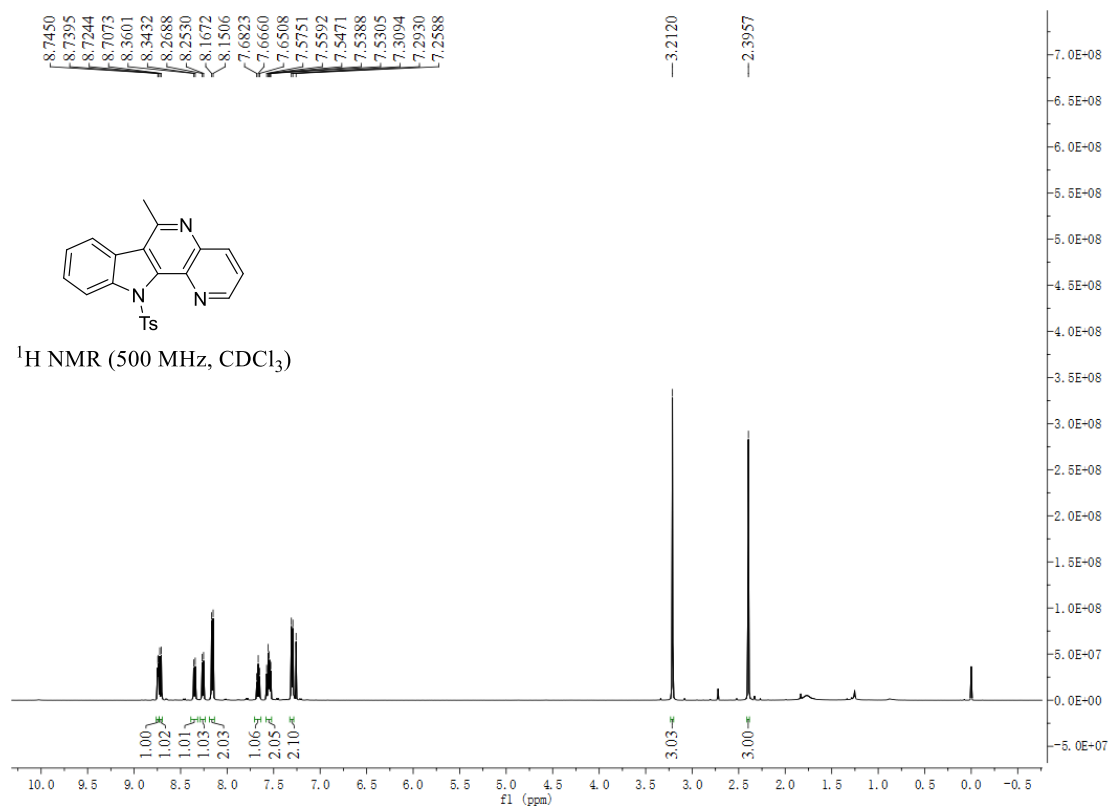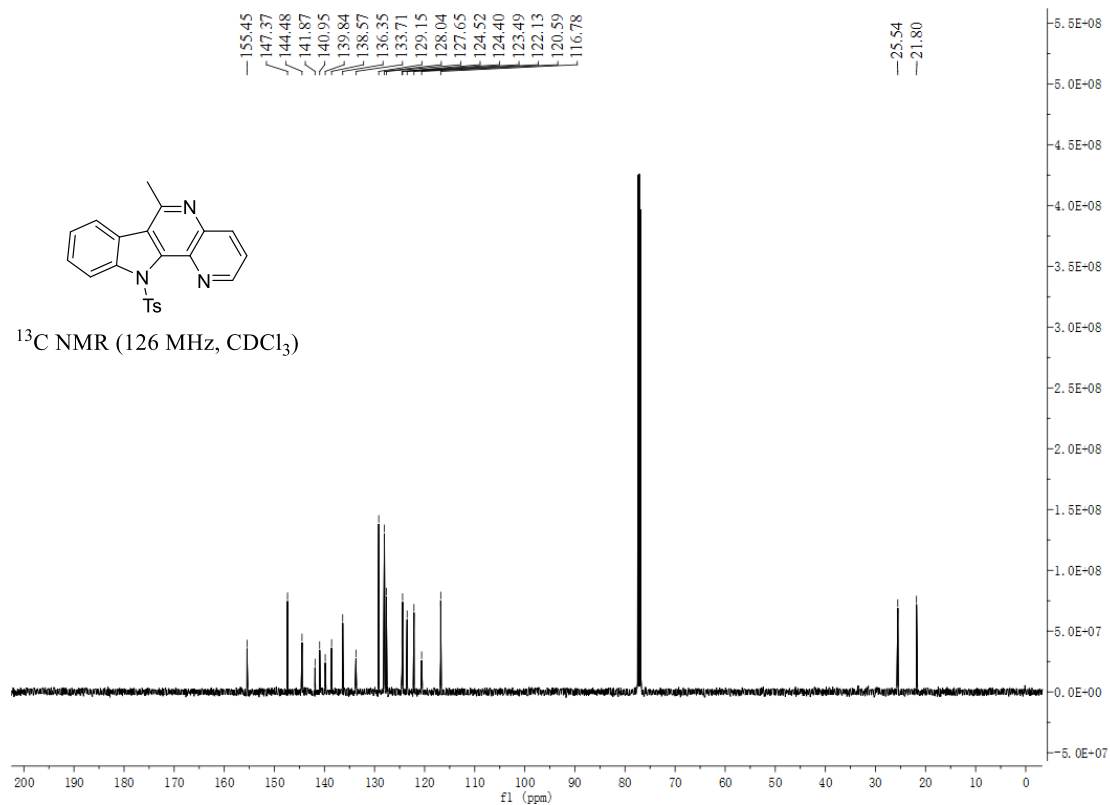

# Compound 2r

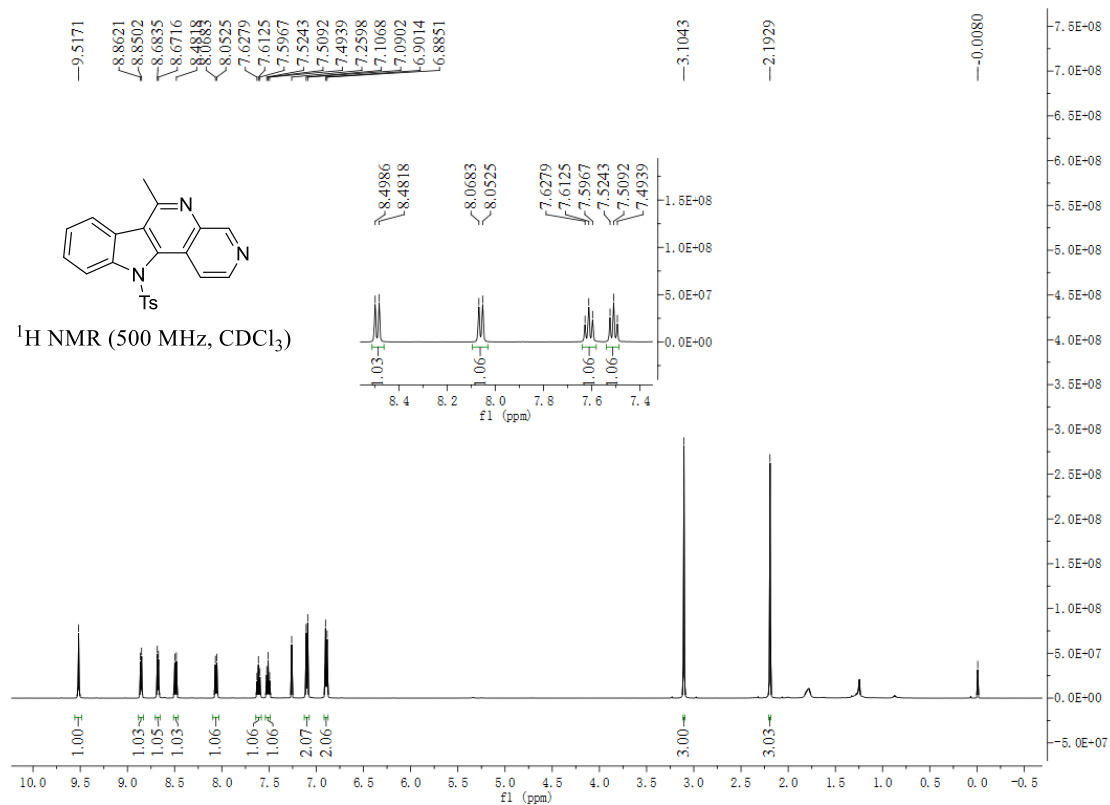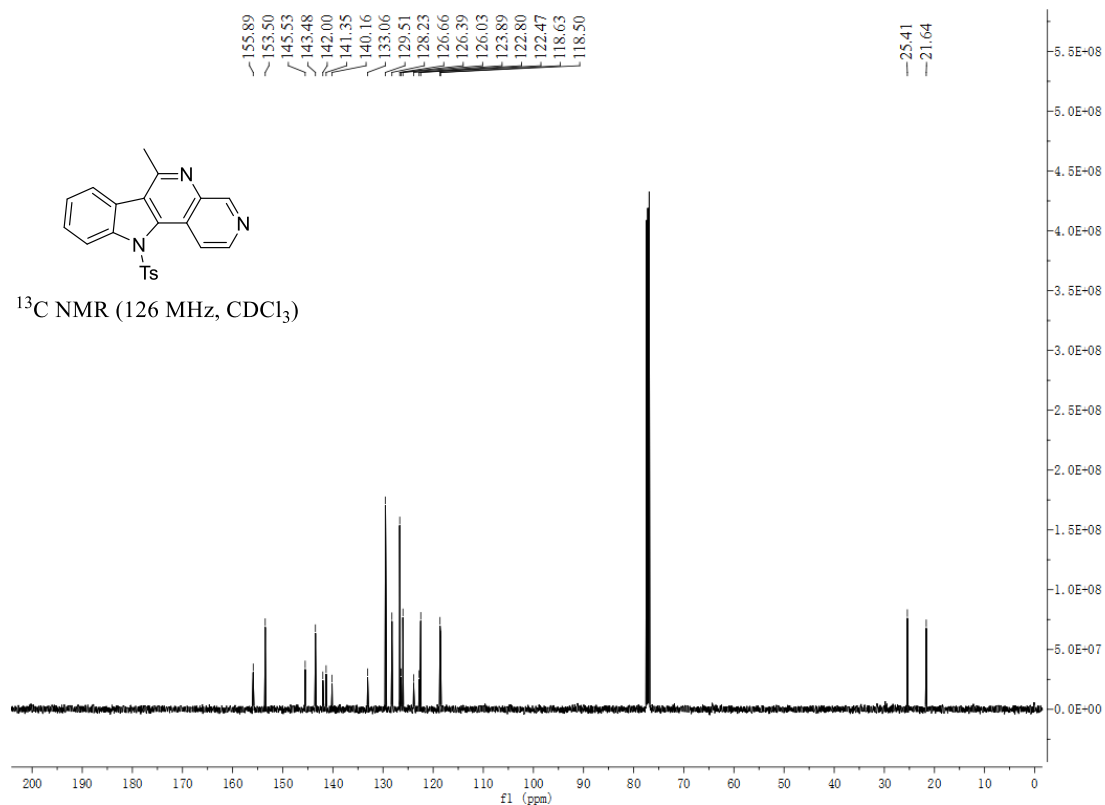

## Compound 2s

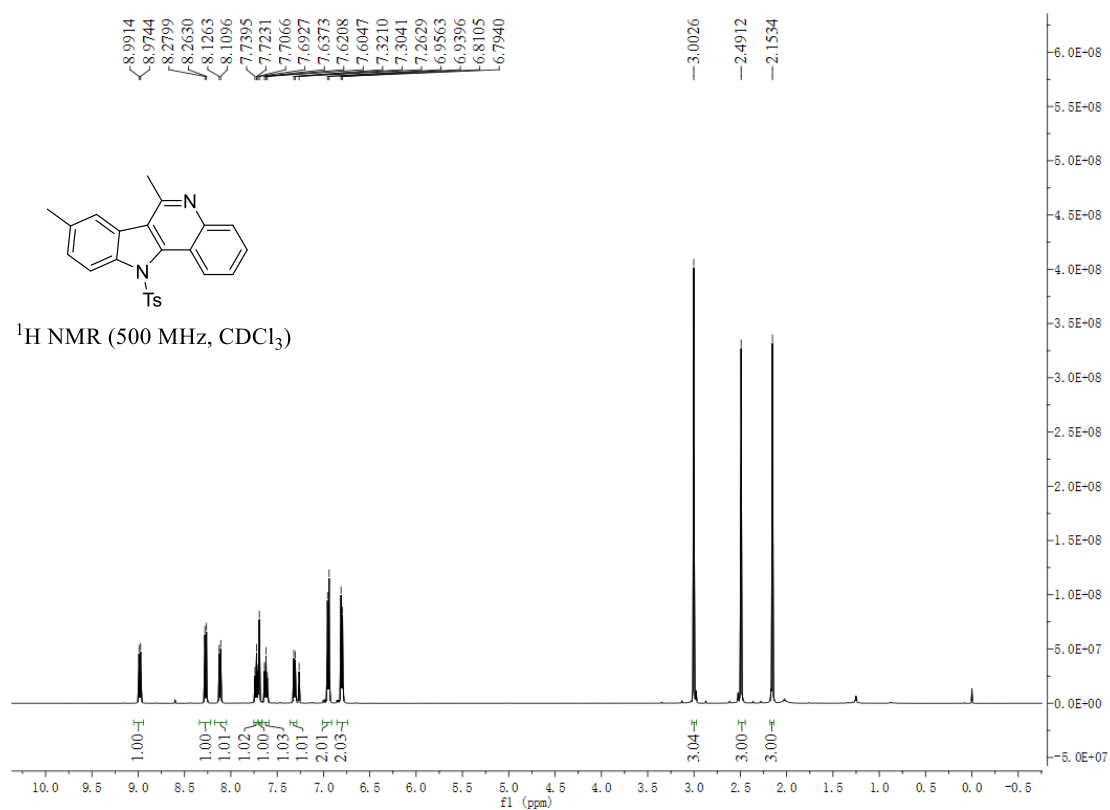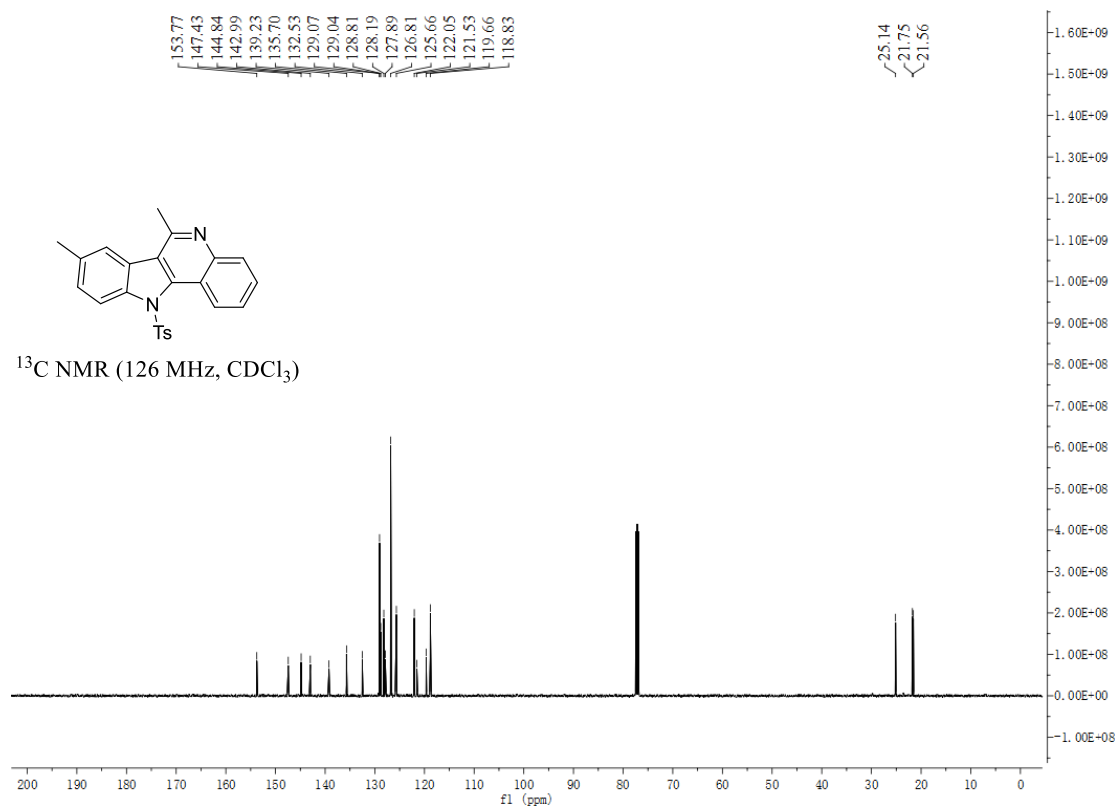

# Compound 2t

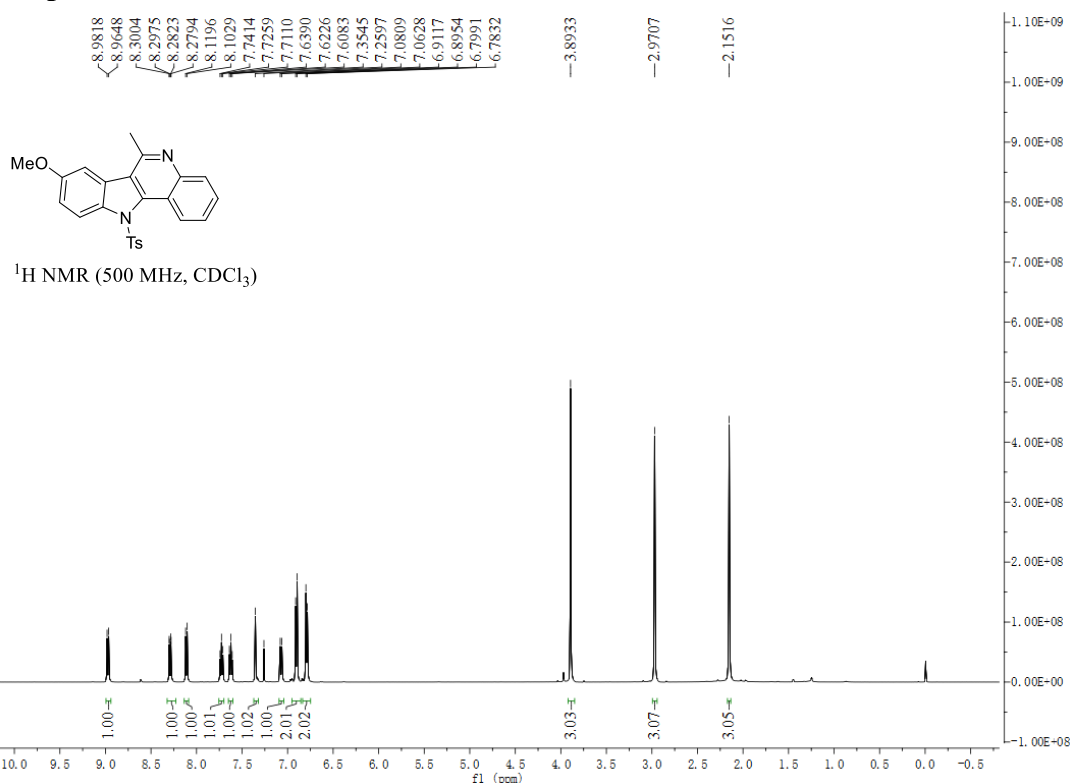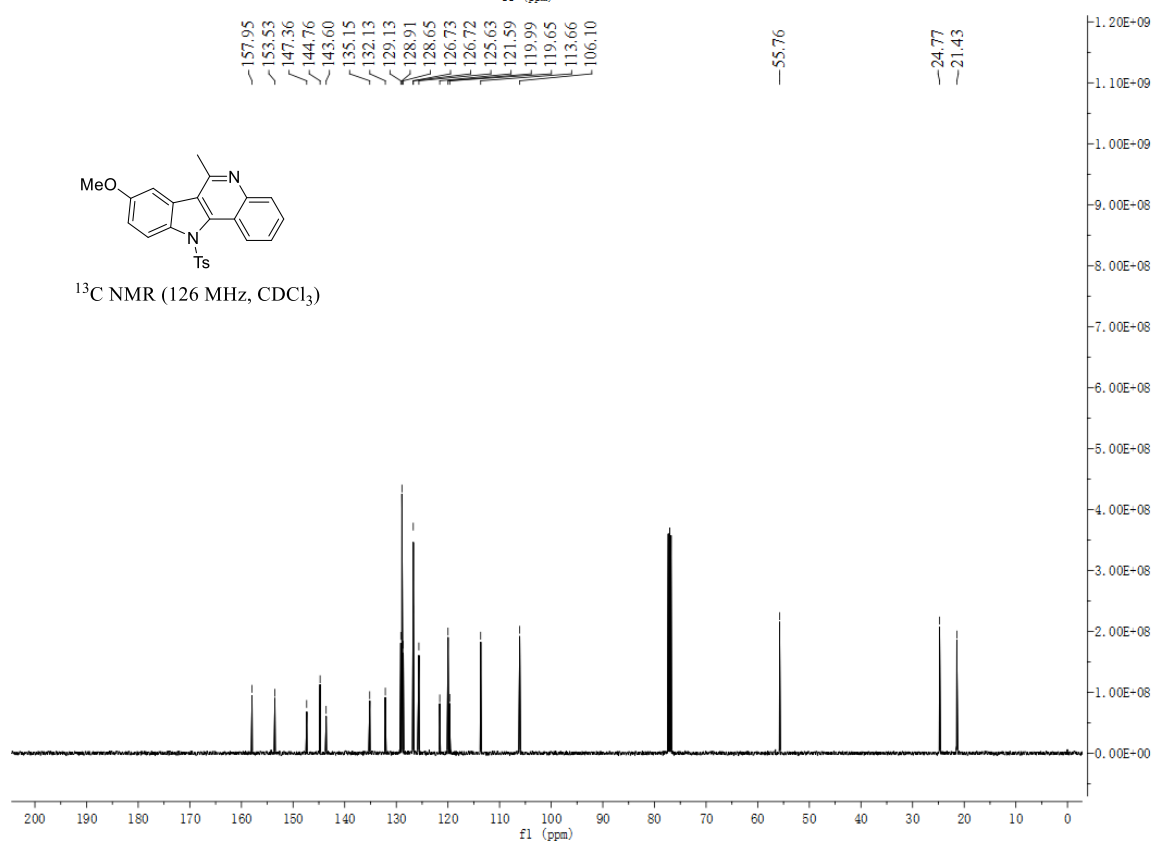

# Compound 2u

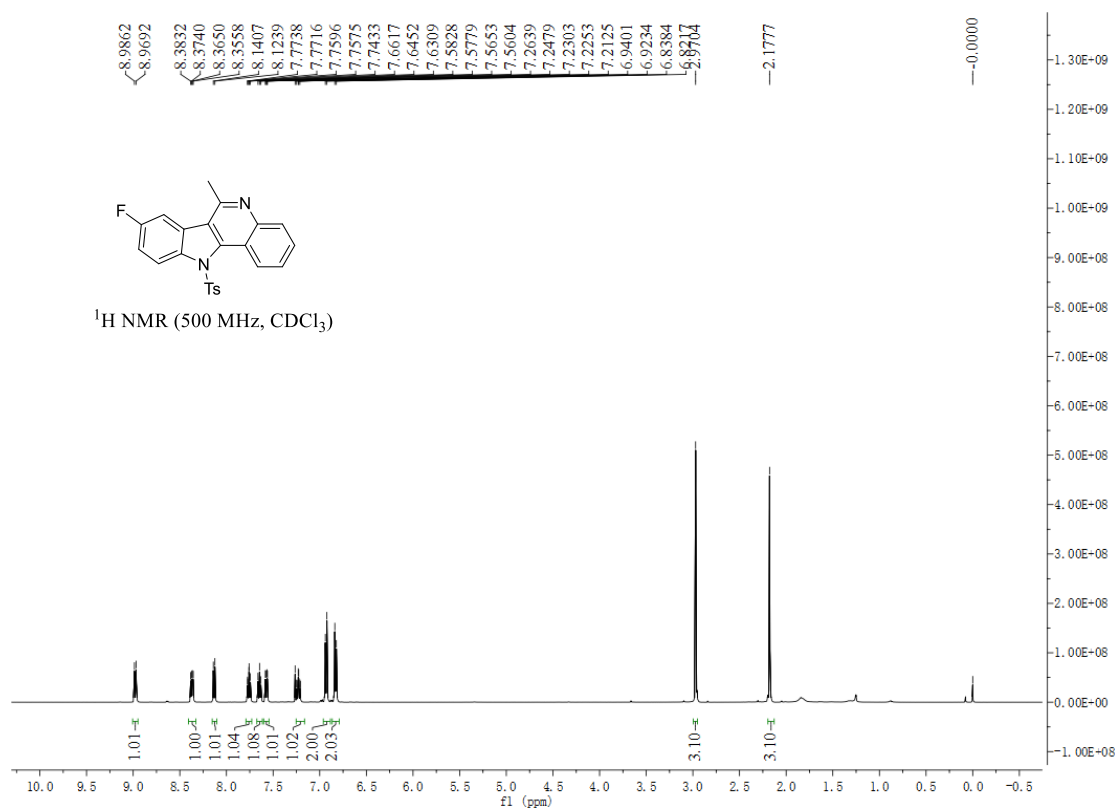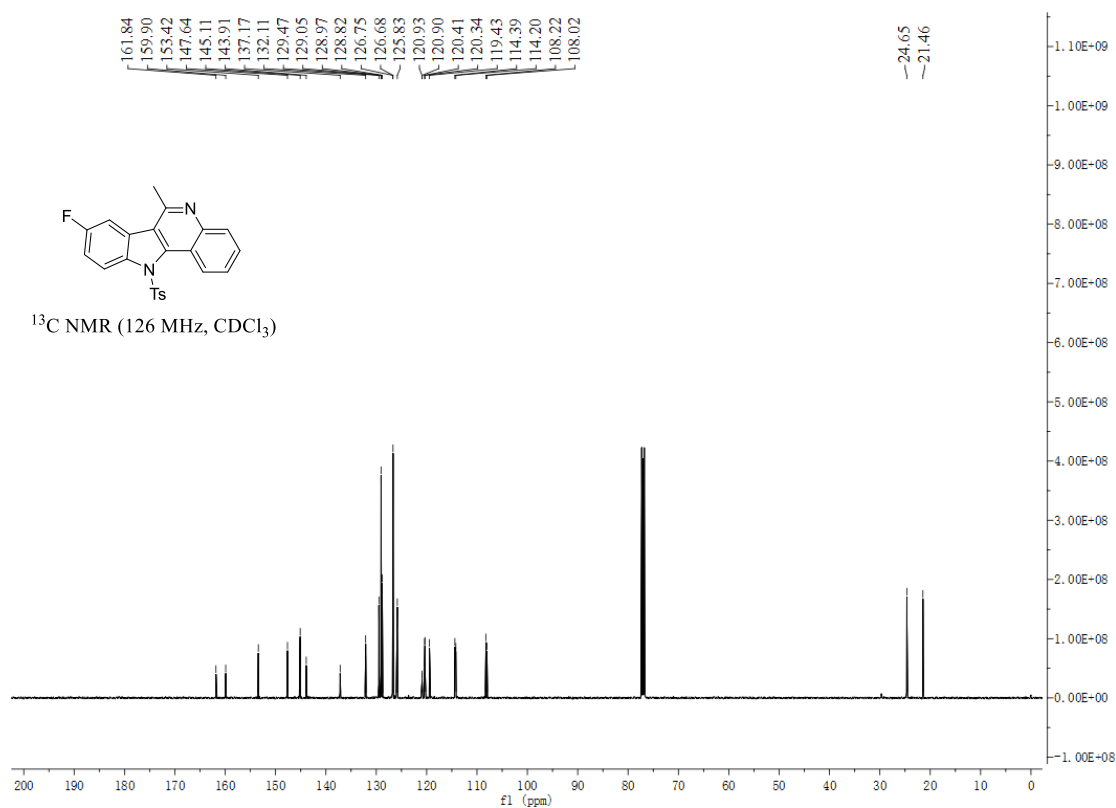

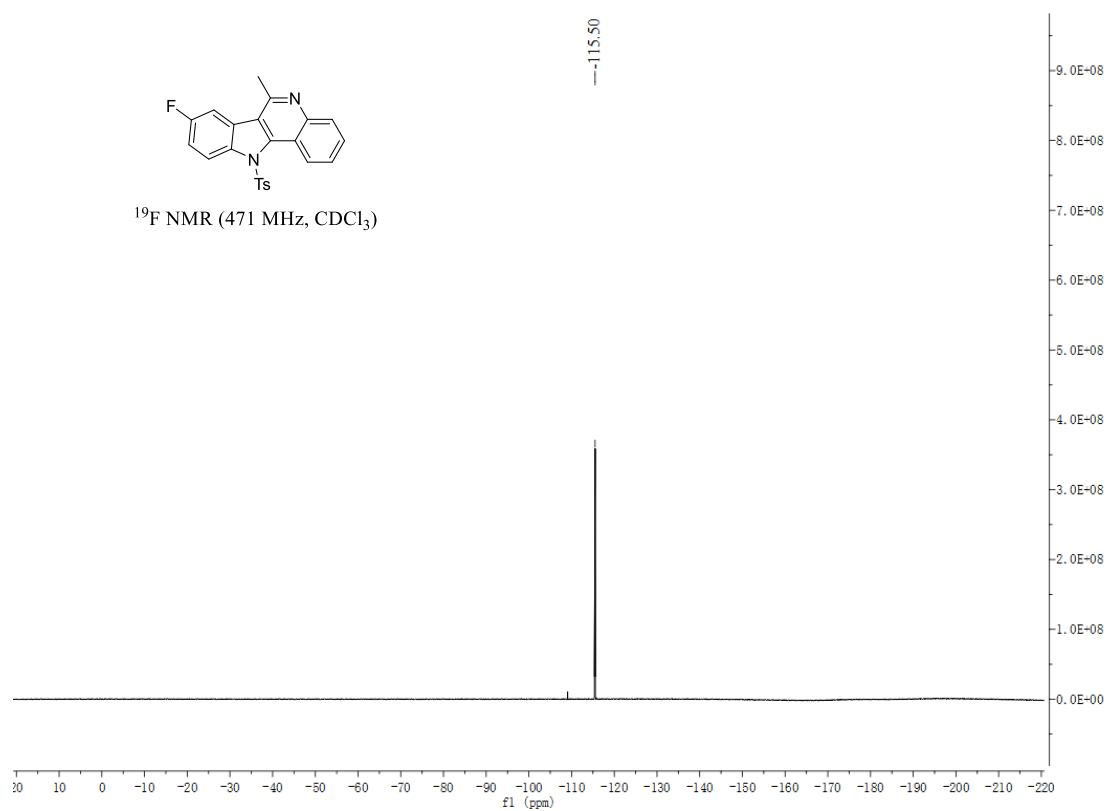

# Compound 2v

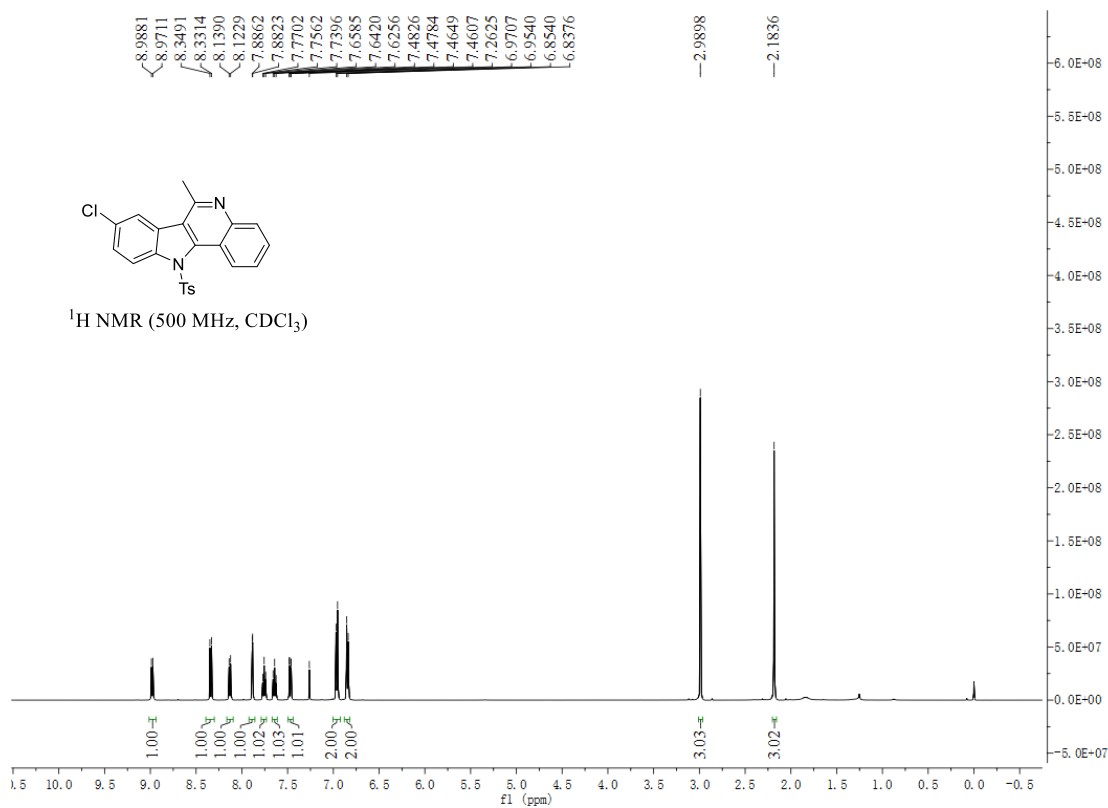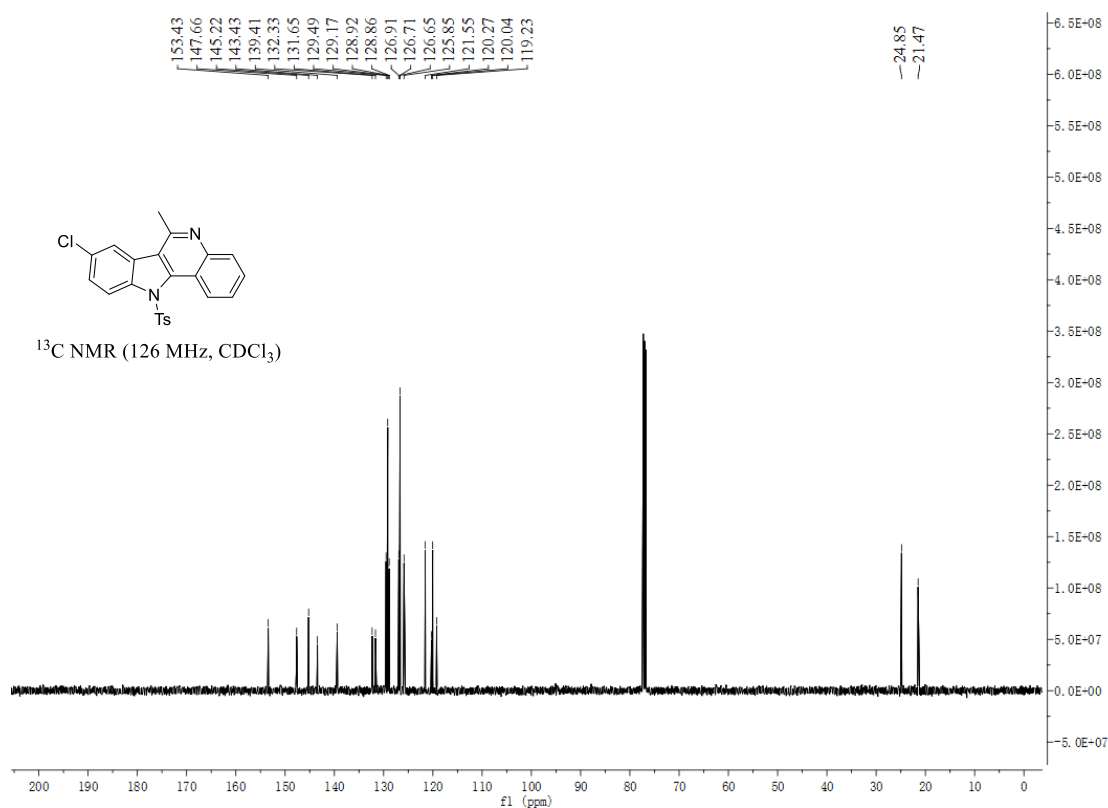

## Compound 2w

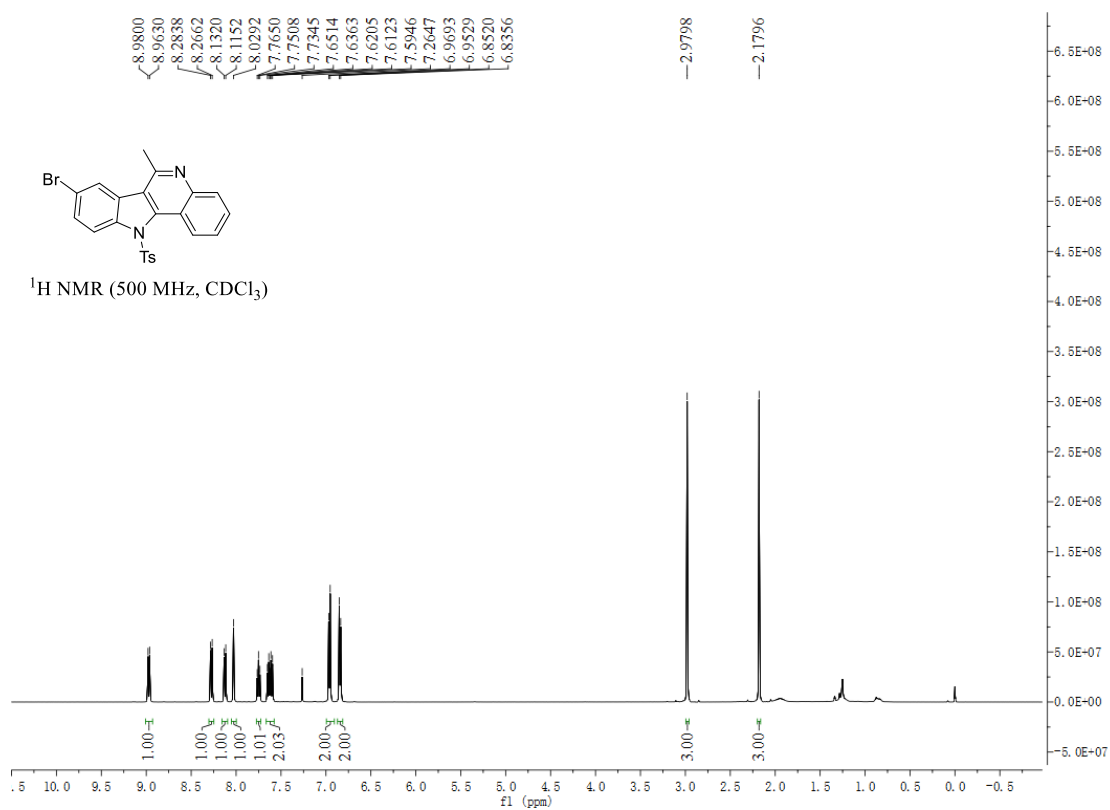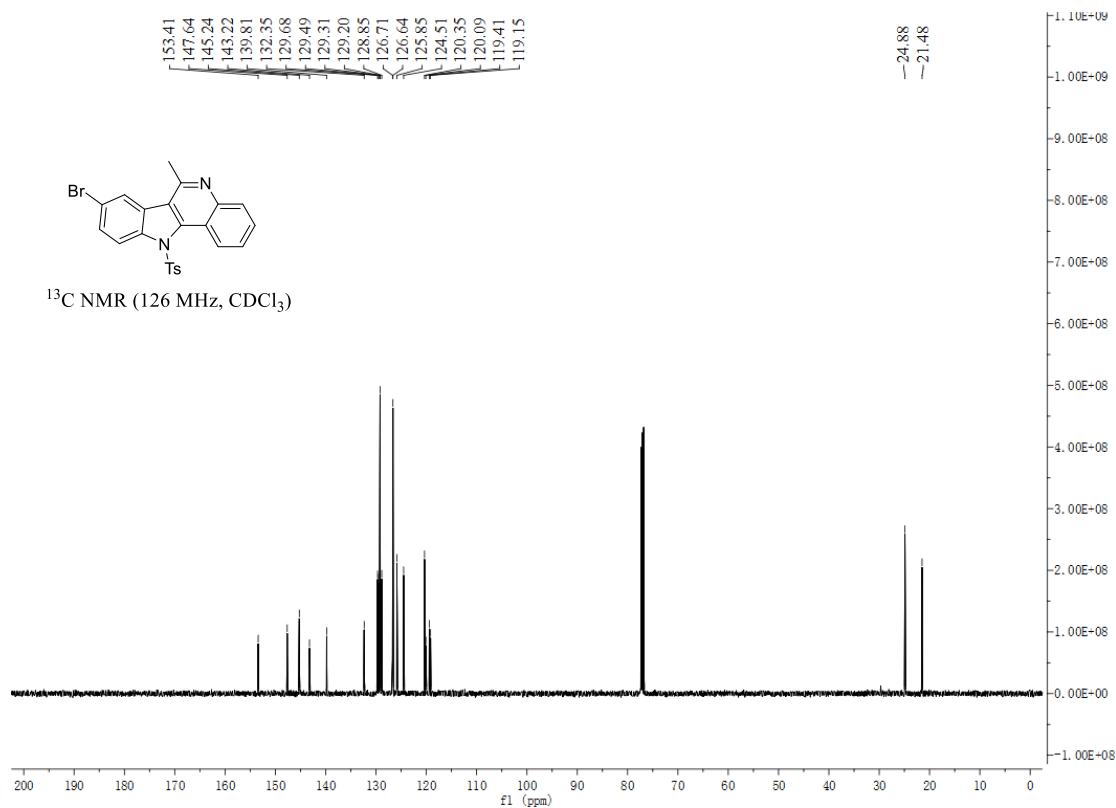

# Compound 2x

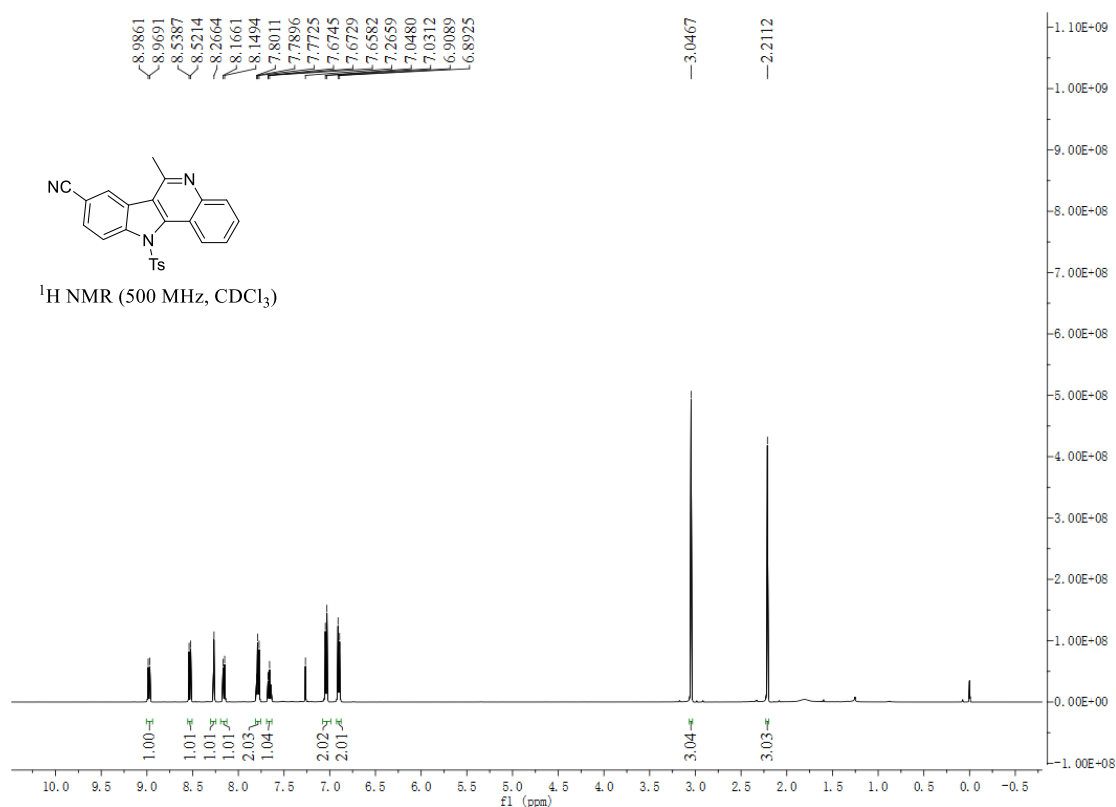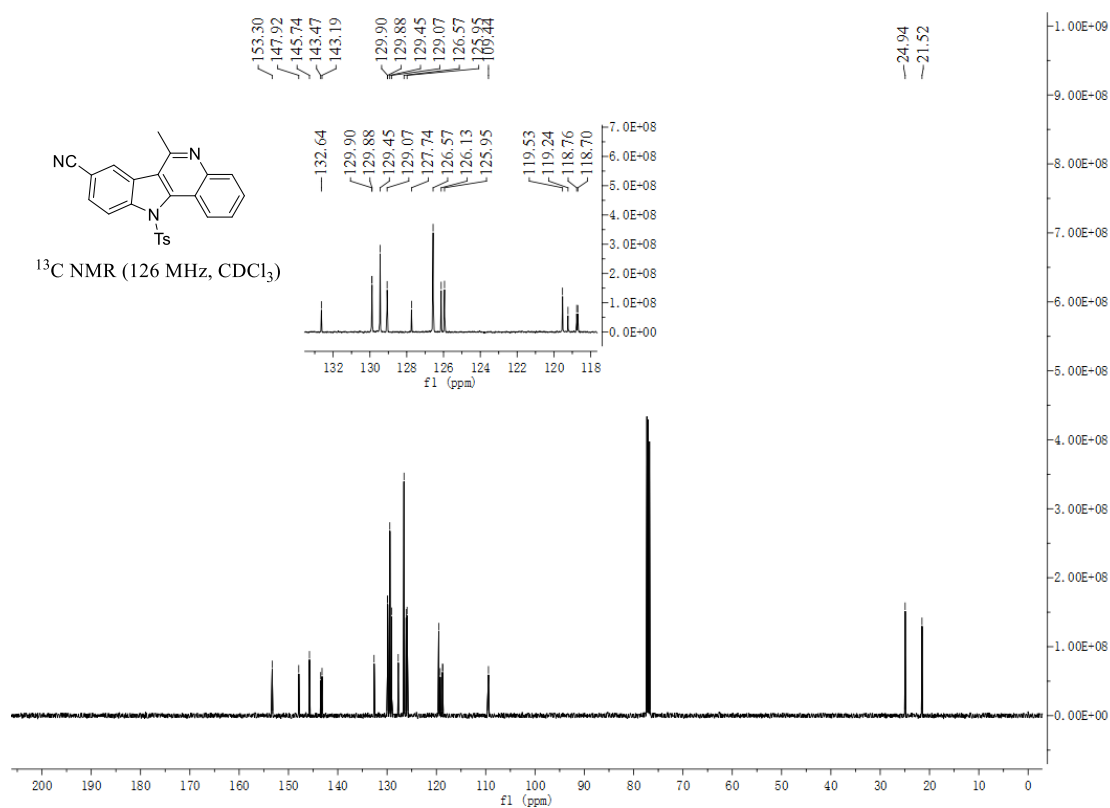

# Compound 2ya

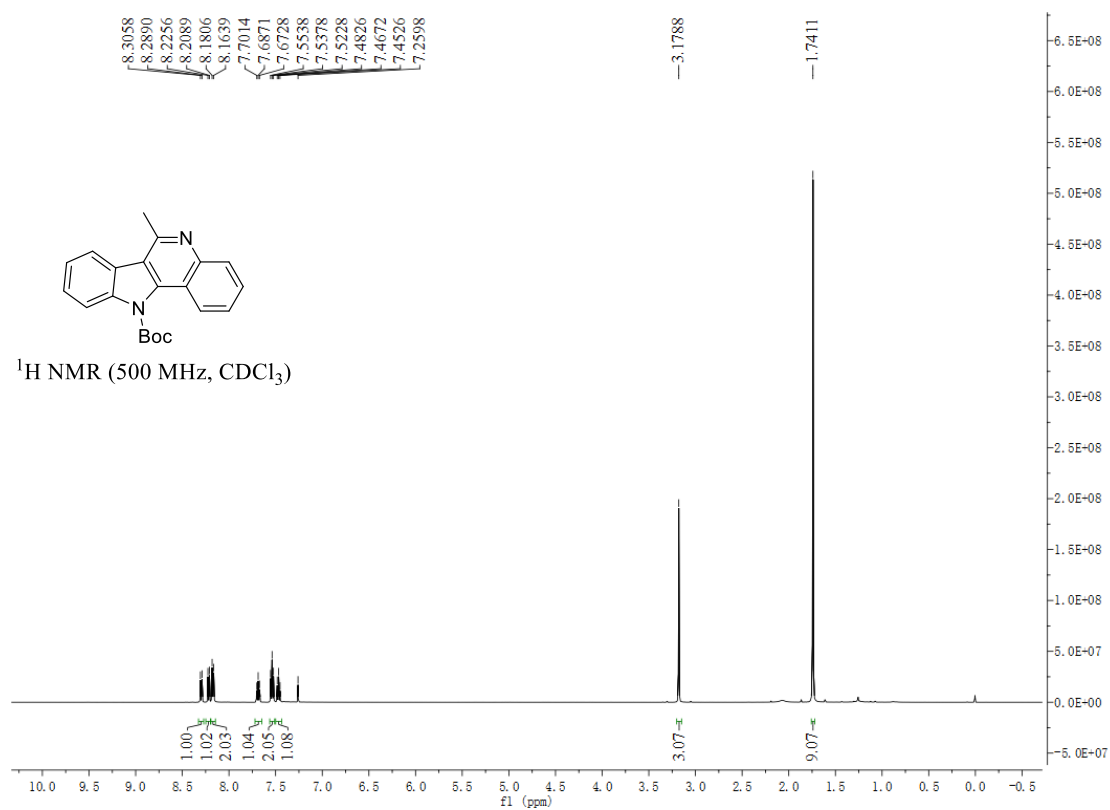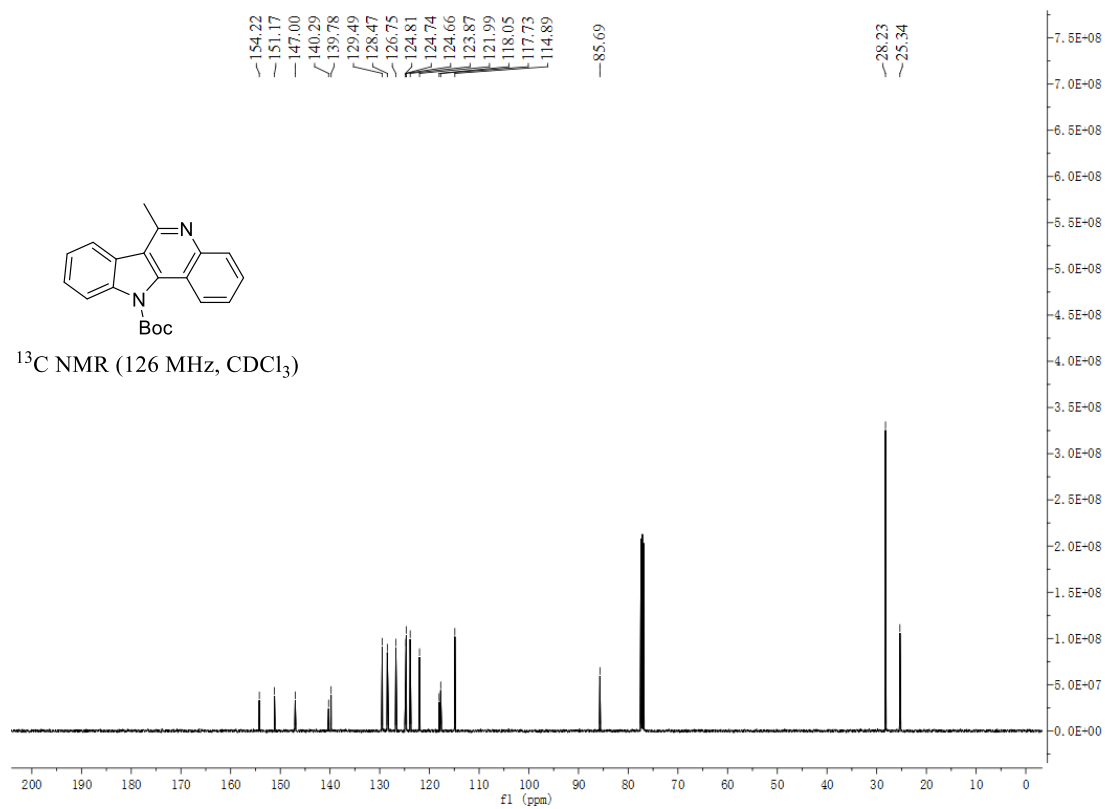

# Compound 2yb

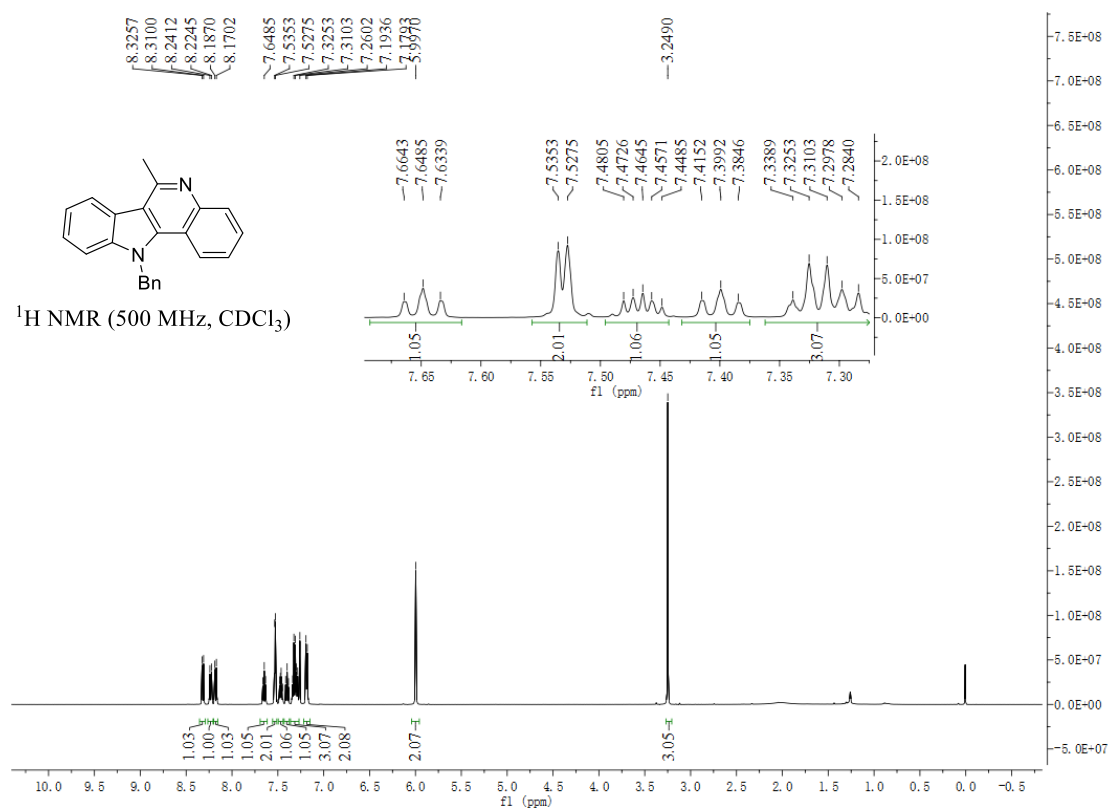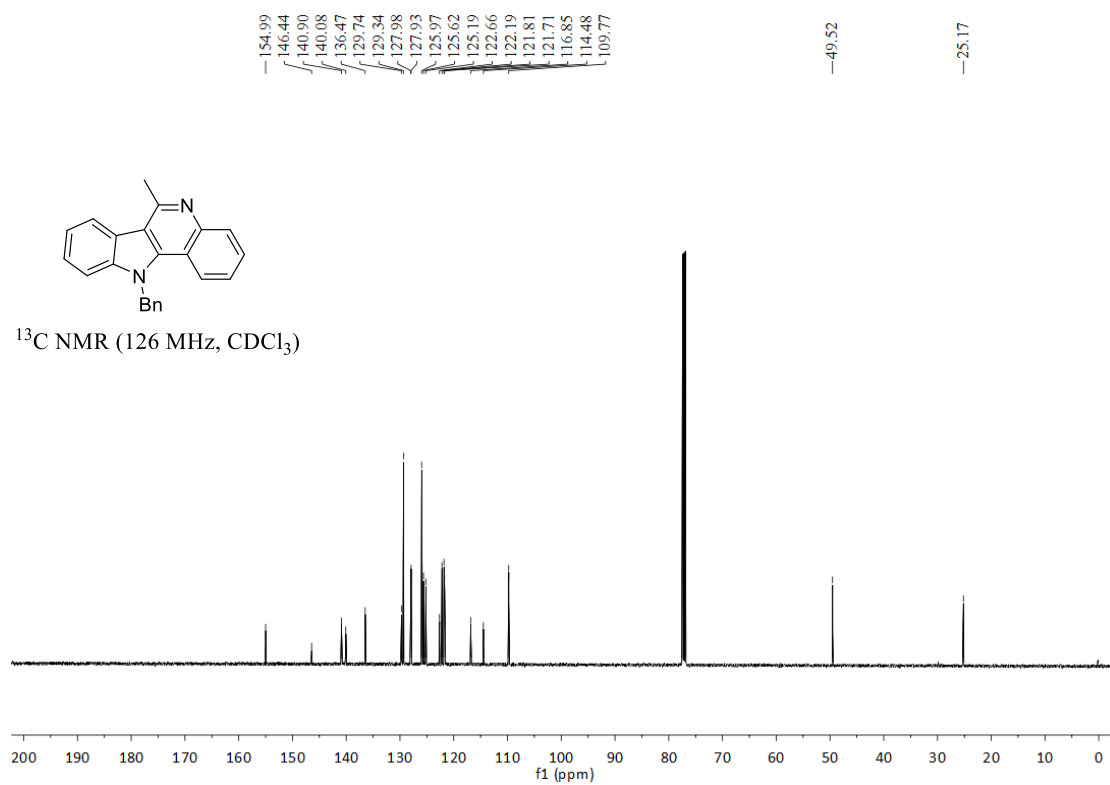

# Compound 2yc

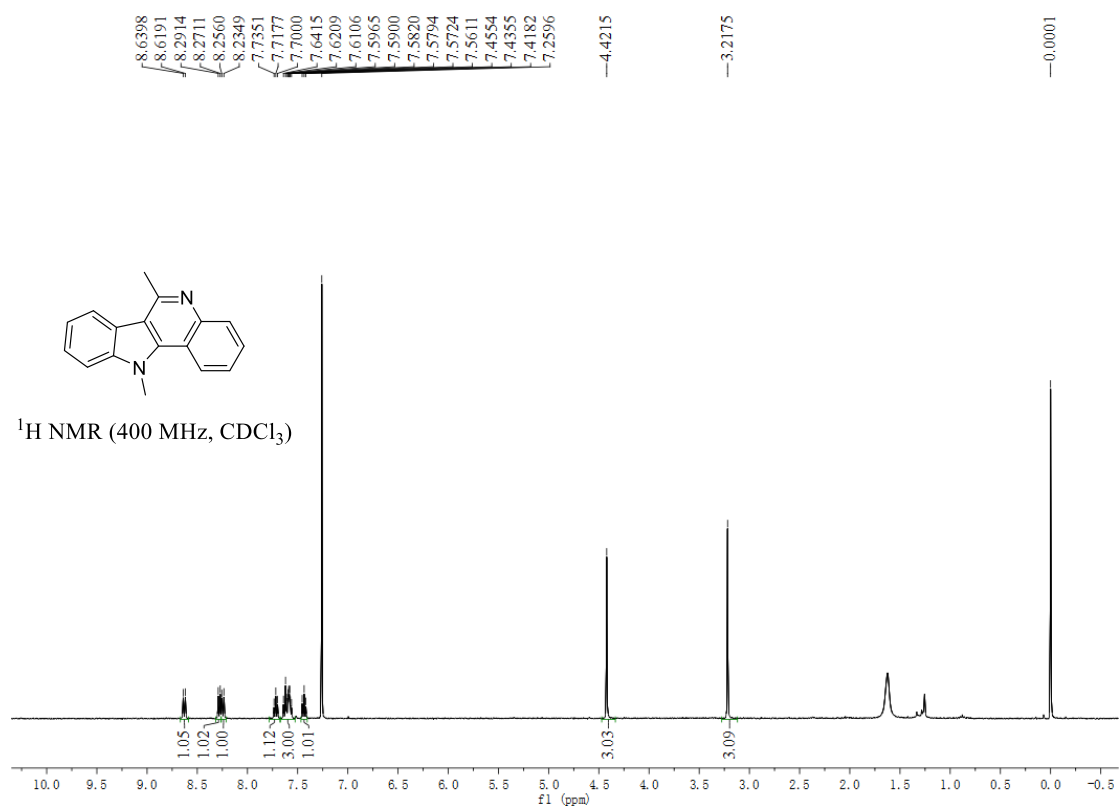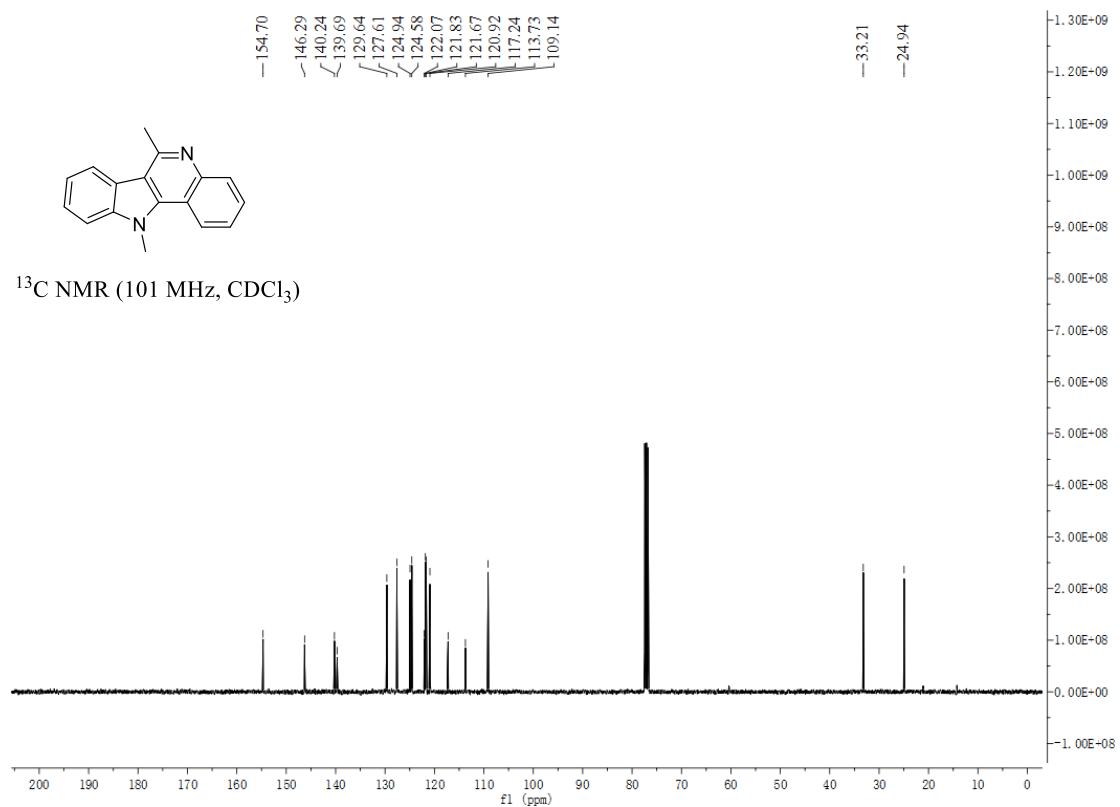

## Compound 2yd

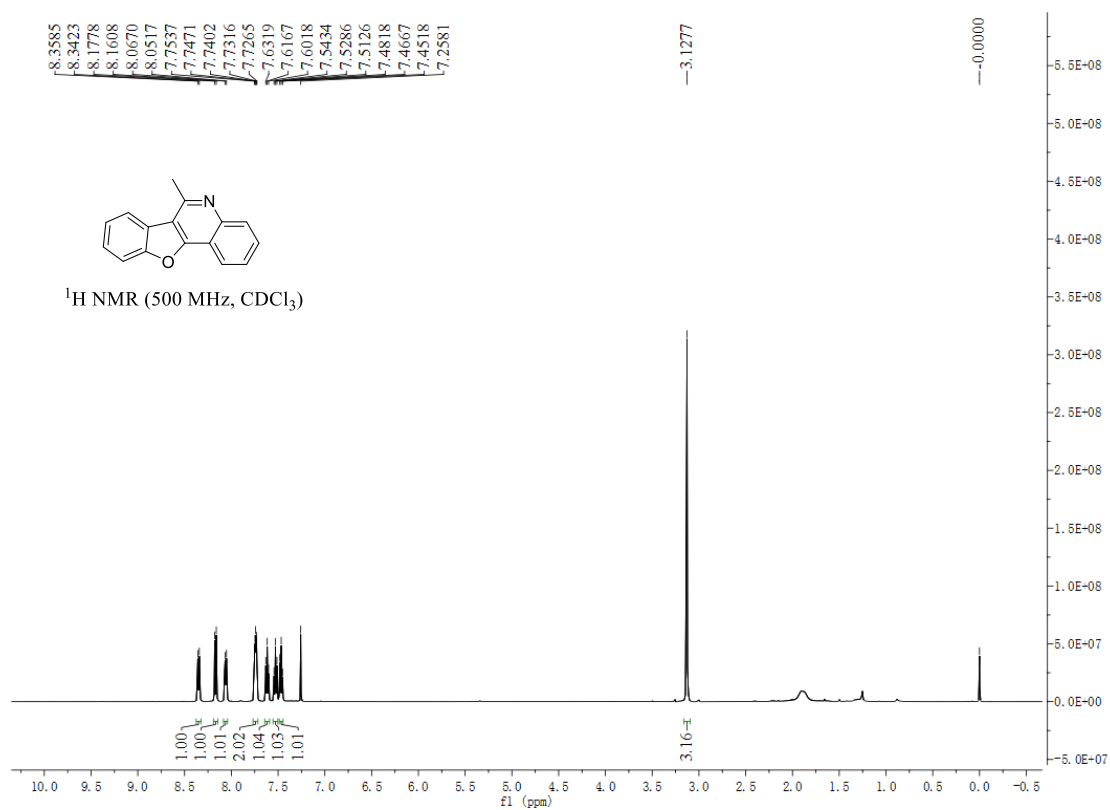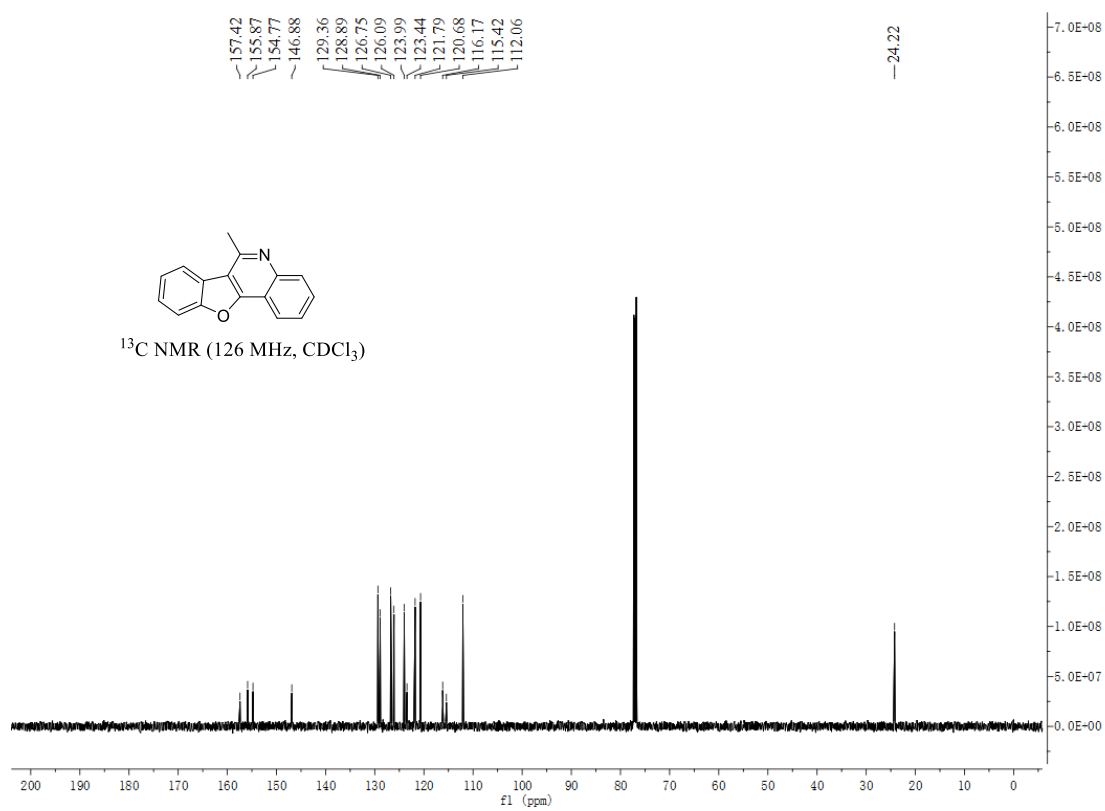

## Compound 2ye

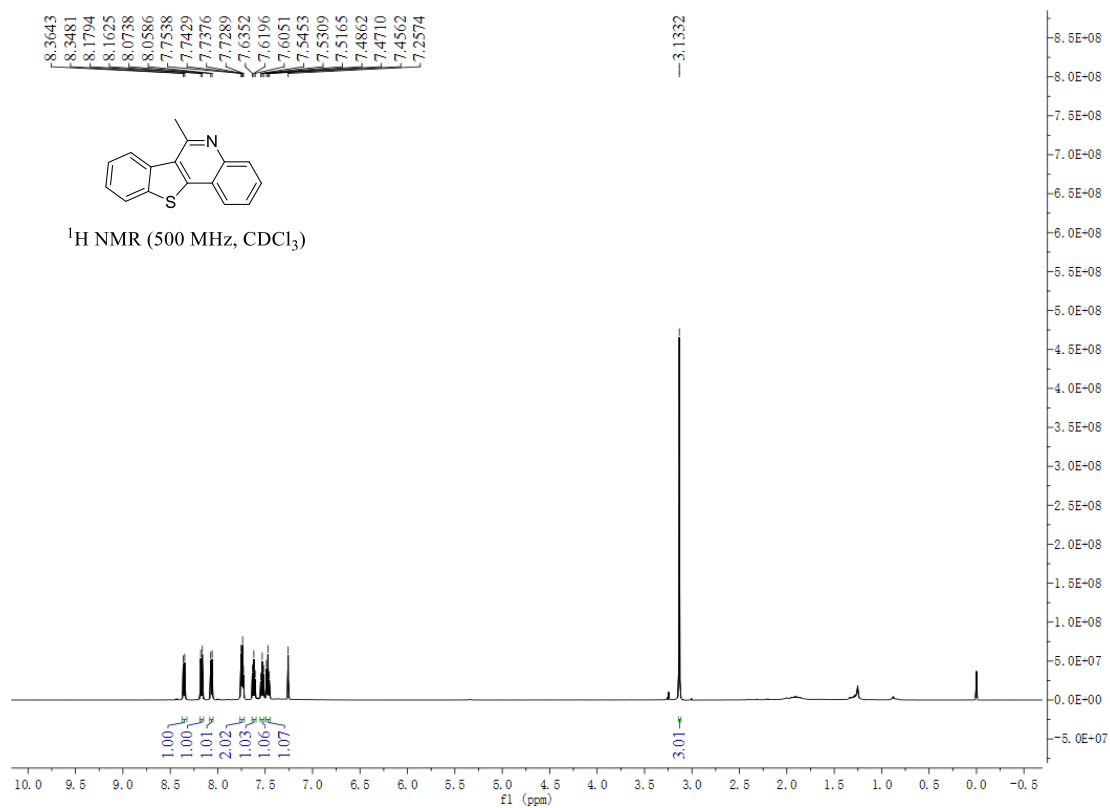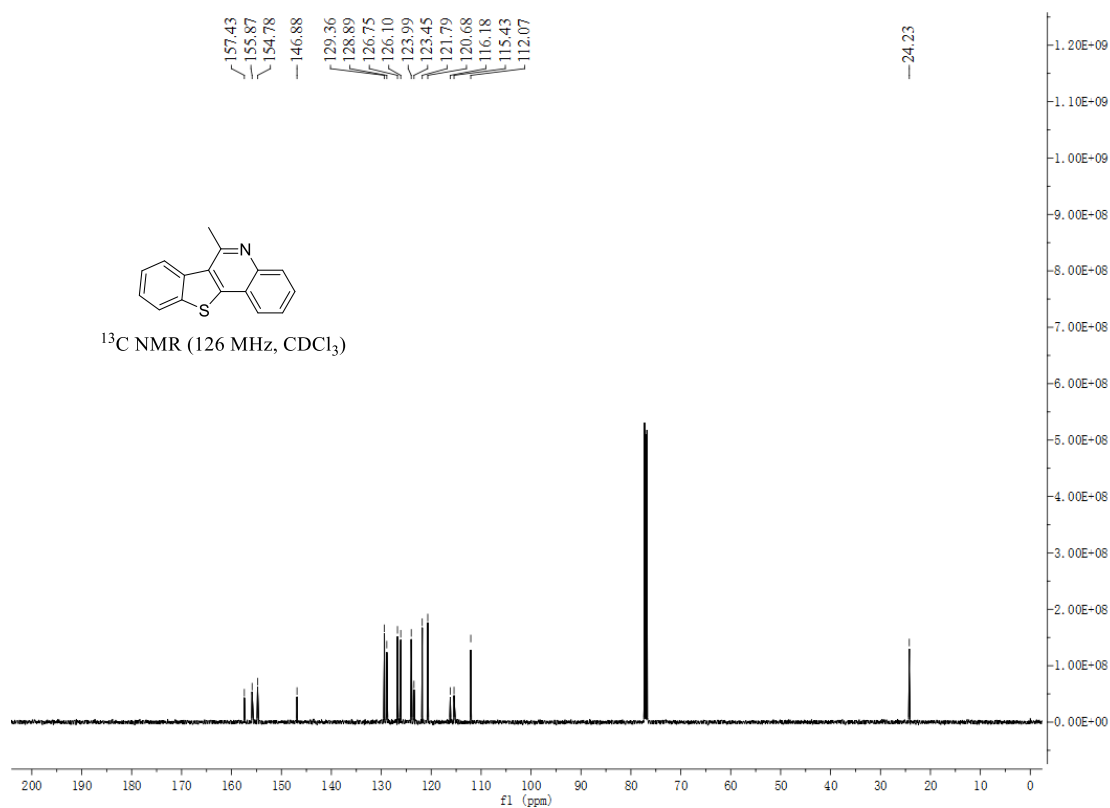

# Compound 2yf

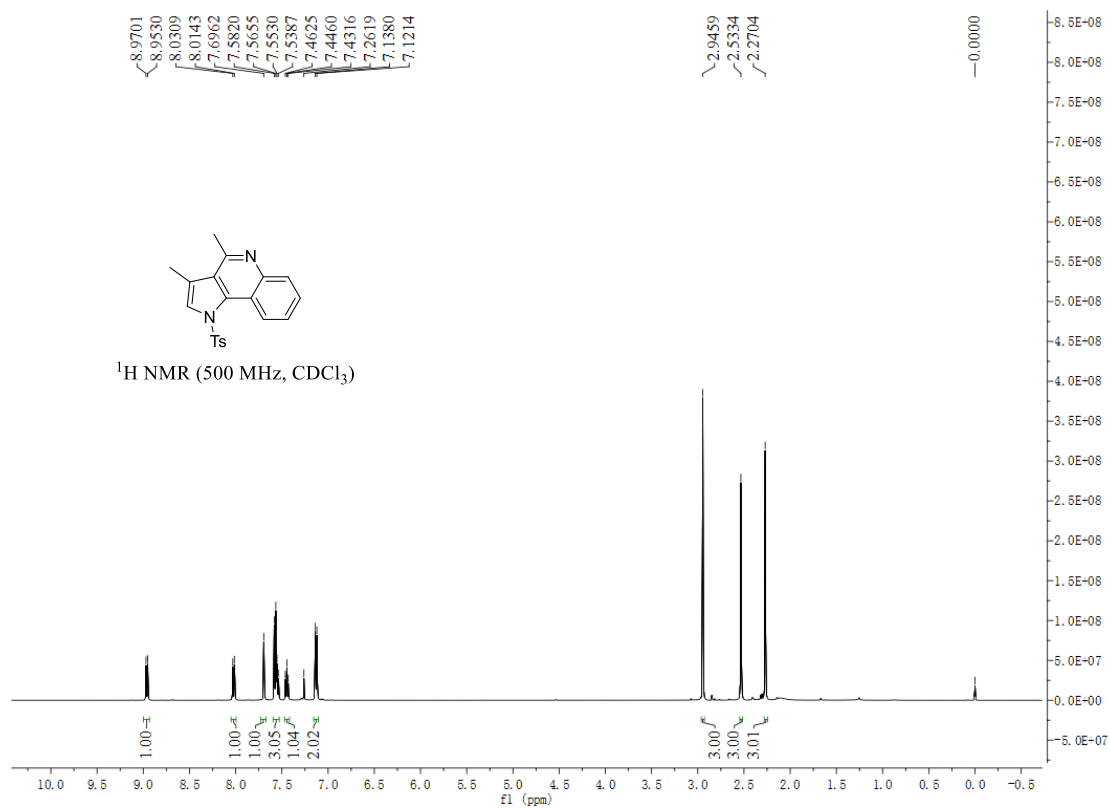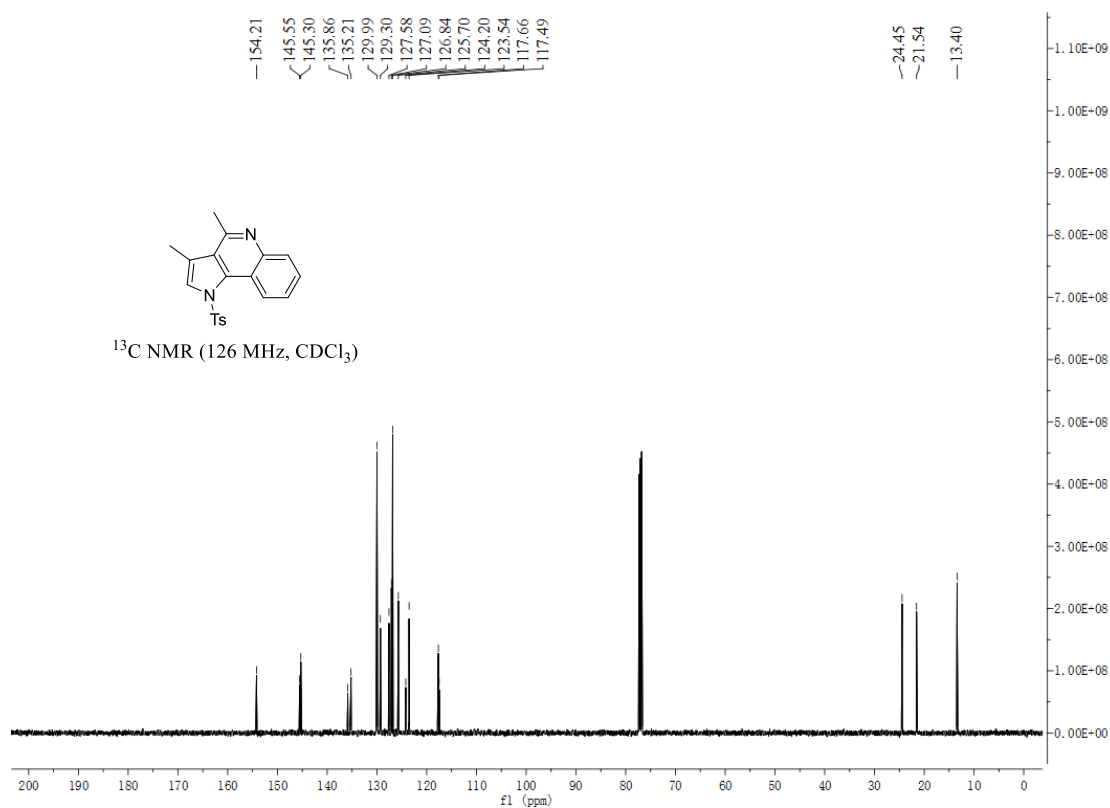

## Compound 2za

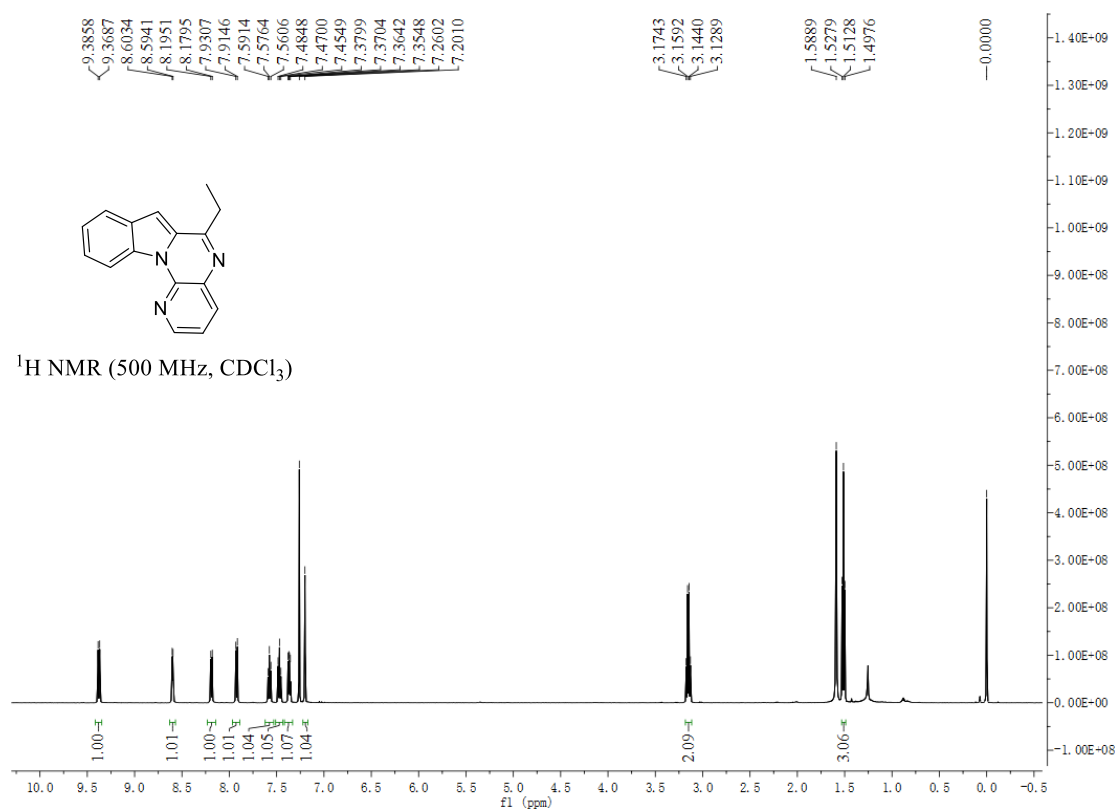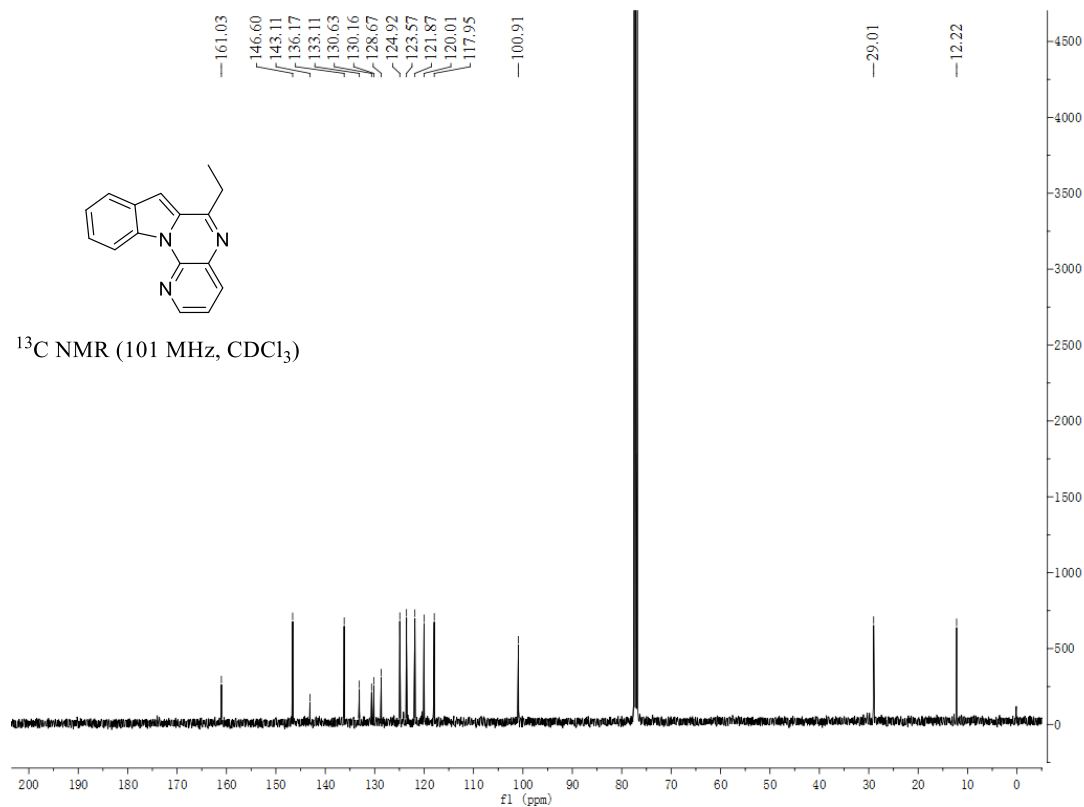

## Compound 2zb

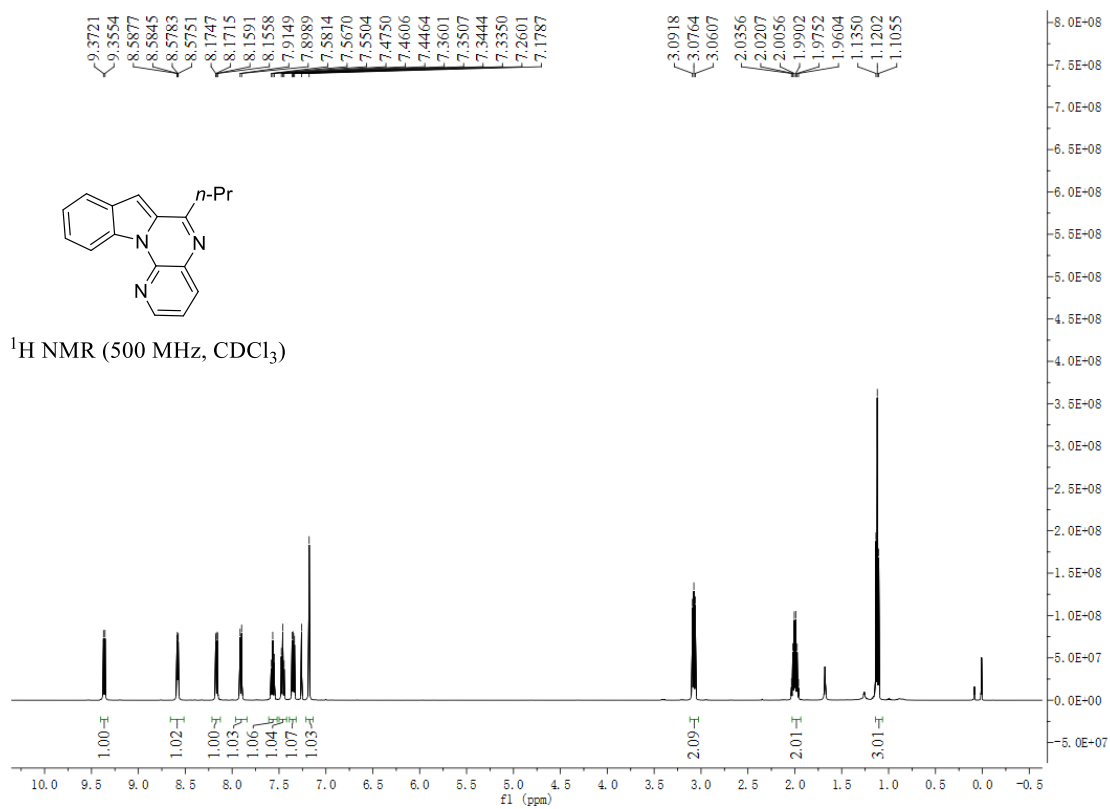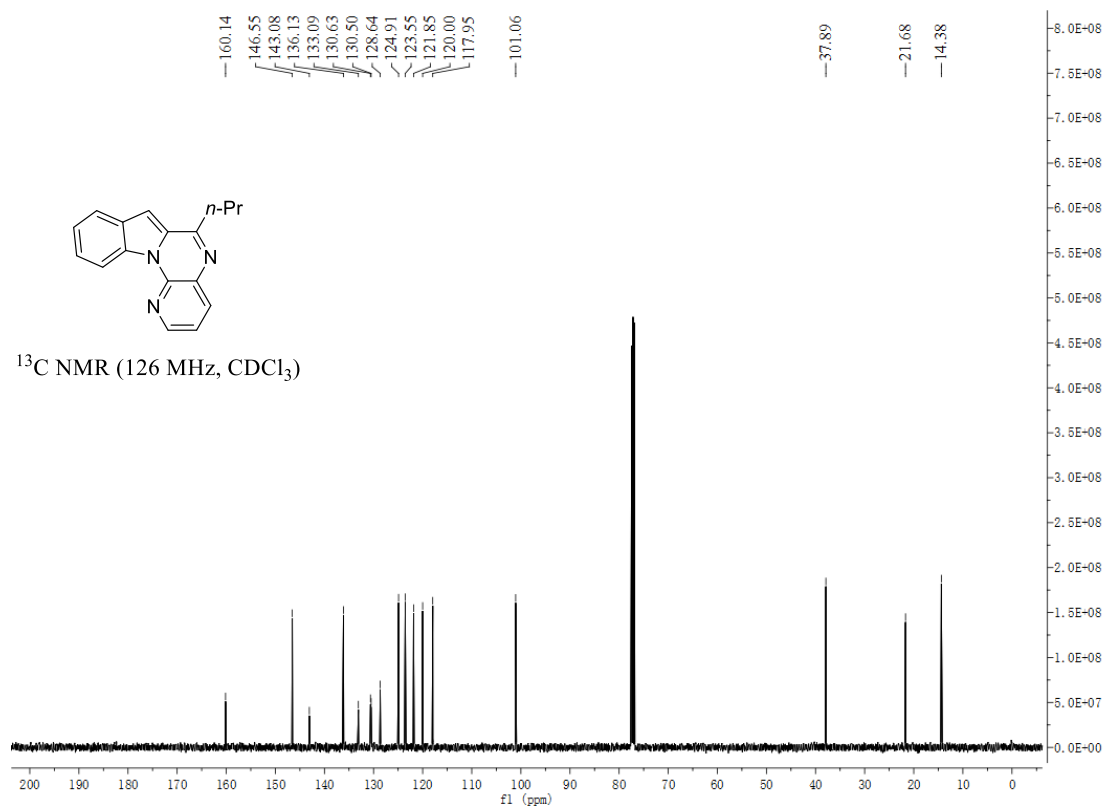

# Compound 4a

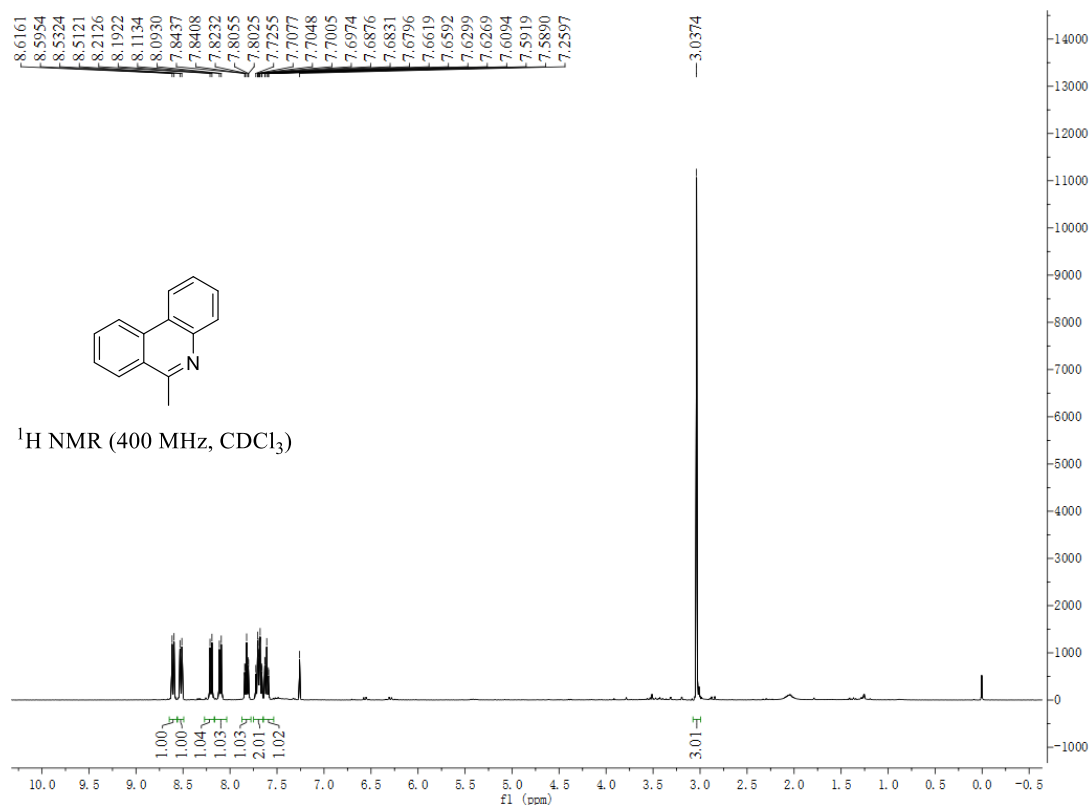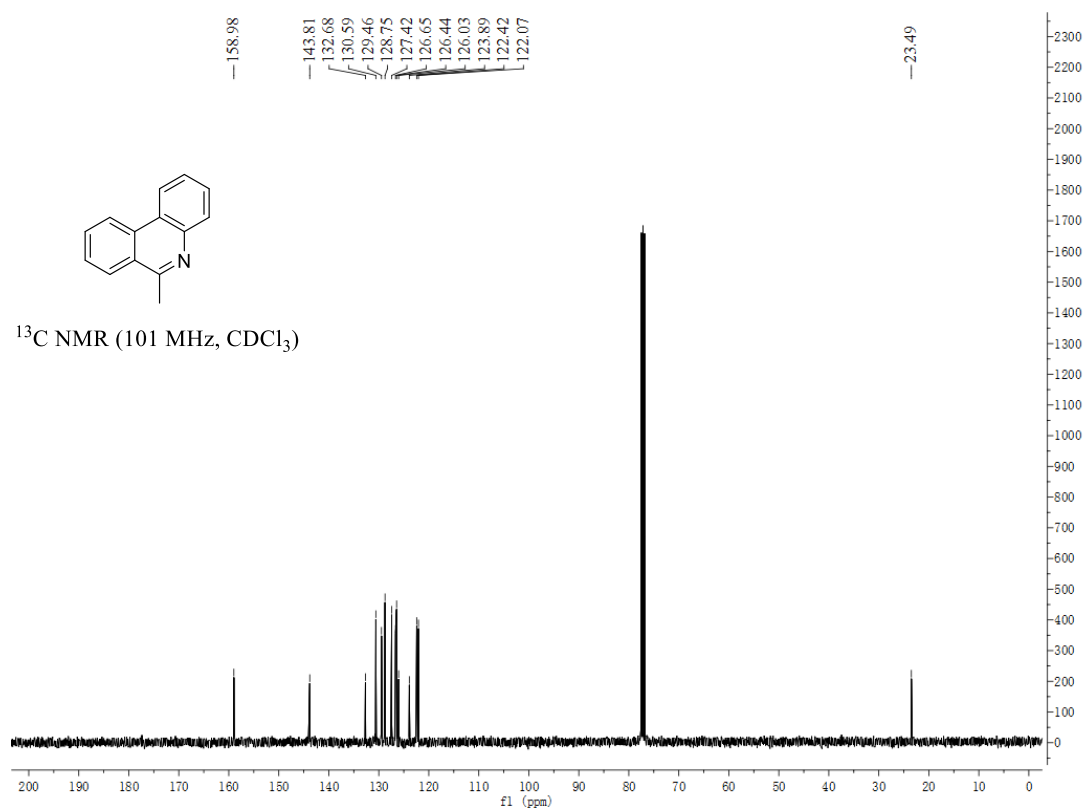

Supplement: d1cc03891e1.pdf [file d1cc03891e1.pdf]
